# Supplementary material for: DNA Methylation Diversification at the Integrated Organellar DNA-Like Sequence
Source: MDPI journal article supplement (doi:10.3390/genes9120602), 2018-12-03
Supplement: s1 [file s1]

>Region1\_Col

ATGGATCATATGTTTCCAAAAGGTAAACTTTCCCCTTCCTTTCTAGGTATGTGGGTGTT  
AGCGTGCCAGATATAACTCAATCGATGTGGTTCATCATCTTCTTTCAATACTTCTGGATG  
ACCCTTTGTACCTGTATTCAGGAACATAAACTTCATAAACAAAGAAACCGAGTTCGAACT  
GAATTTTGTTTTGT

>Region1\_Ler

ATGGATCATATGTTTCCAAAAGGTAAgACTTTCCCCTTCCTTTCTAGGTATGTGGGTGTT  
AGCcTGCCAGATATAACTCAATCGATGcGGTTCgTCATCTTCTTTCACTACTTCTGGATGA  
CCCTTCGTACCTGTATTCAGGAACATAAACTTCATAATCAAAGAAACCGAGTTCGaACTG  
AATTTTGTTTTGT

>Region2\_Col

GGAAAAAAGAAGGGCTGTTATGTAAAGATGGAAGAGTGGCGTCTCGAATCAGTCAAGC  
TTTCTCCCAATTTCTTCTATATTTTCATTTGTTTCTCTATTTAGCACAGAAAACATCTCG  
GTCTTATCAGATGGTATCAGAGCCTTCGATCTTGGTTAAAAACGTACCGTCAAGCAAGA  
AACGGAACCGTAAACTAGCCCAACATTCTCGGAAAACATAAAGAATCGAGGGTCCCCCA  
ACGAGTAAGGGAGTGAGTCTGTC

>Region2\_Ler

GGAAAAAAGAAGGGCTGTTATGTAAAGATGGAAGAGTGGCGTCTCGAATCAGTCAAGC  
TTTCTCCCAATTTCTTCTATATTTTCATTTGTTTCTCTATTTAGCACAGAAAACATCTCG  
GTCTTATCAGATGGTATCAGAGCCTTCGGTCTTGGTTAAAAACGTACCGTCAAGCAAGA  
AACGGAACCGTAAACTAGCCCAACATTCTCGGAAAACATAAAGAATCGAGGGTCCCCCA  
ACGAGTAAGGGAGTGAGTCTGTC
