# Supplementary material for: DNA Methylation Diversification at the Integrated Organellar DNA-Like Sequence
Source: MDPI journal article supplement (doi:10.3390/genes9120602), 2018-12-03
Supplement: s1 [file s1]

**Supplementary Table S1 Primers used in the amplicon-Seq**

| Primer Name      | Primer sequence (5' to 3')                                  | Description                                    |
|------------------|-------------------------------------------------------------|------------------------------------------------|
| <b>Region 1:</b> |                                                             |                                                |
| overhang_327F    | TCGTCGGCAGCGTCAGATGTGTATAAGAGACAGATGGATYATATGTTTTYAAAAGGTA  | PCR using bisulfite-modified gDNA for region 1 |
| overhang_520R    | GTCTCGTGGGCTCGGAGATGTGTATAAGAGACAGACAAAACAAAATTCARTTCRAACTC | PCR using bisulfite-modified gDNA for region1  |
| <b>Region 2:</b> |                                                             |                                                |
| oh_numt1381_136F | TCGTCGGCAGCGTCAGATGTGTATAAGAGACAGGGAAAAAAGAAGGGYTGTTATGTAA  | PCR using bisulfite-modified gDNA for region 2 |
| oh_numt1381_395R | GTCTCGTGGGCTCGGAGATGTGTATAAGAGACAGRACARACTCACTCCCTTACTC     | PCR using bisulfite-modified gDNA for region2  |

**Supplementary Table S2    Position and motif (CpG, CpHpG, and CpHpH) in analyzed sequence**

| position         | motif | Col | Ler |
|------------------|-------|-----|-----|
| <b>Resion 1:</b> |       |     |     |
| 29               | CHH   | CTT | CTT |
| 33               | CHH   | CCC | CCC |
| 34               | CHH   | CCC | CCC |
| 35               | CHH   | CCT | CCT |
| 36               | CHH   | CTT | CTT |
| 39               | CHH   | CCT | CCT |
| 40               | CHH   | CTT | CTT |
| 44               | CHH   | CTA | CTA |
| 67               | CHH   | CCA | CCA |
| 68               | CHG   | CAG | CAG |
| 77               | CHH   | CTC | CTC |
| 79               | CHH   | CAA | CAA |
| 83               | CG    | CGA | CGA |
| 96               | CHH   | CAT | CAT |
| 99               | CHH   | CTT | CTT |
| 102              | CHH   | CTT | CTT |
| 111              | CHH   | CTT | CTT |
| 114              | CHG   | CTG | CTG |
| 122              | CHH   | CCC | CCC |
| 123              | CHH   | CCT | CCT |
| 124              | CHH   | CTT | CTT |
| 131              | CHH   | CCT | CCT |
| 132              | CHG   | CTG | CTG |
| 139              | CHG   | CAG | CAG |
| 145              | CHH   | CAT | CAT |
| 151              | CHH   | CTT | CTT |
| 154              | CHH   | CAT | CAT |
| 160              | CHH   | CAA | CAA |
| 168              | CHG   | CCG | CCG |
| 169              | CG    | CGA | CGA |
| <b>Resion 2:</b> |       |     |     |
| 40               | CG    | CGT | CGT |

|     |     |     |     |
|-----|-----|-----|-----|
| 45  | CG  | CGA | CGA |
| 119 | CG  | CGG | CGG |
| 147 | CG  | CGA | CGG |
| 163 | CG  | CGT | CGT |
| 168 | CG  | CGT | CGT |
| 182 | CG  | CGG | CGG |
| 188 | CG  | CGT | CGT |
| 209 | CG  | CGG | CGG |
| 225 | CG  | CGA | CGA |
| 50  | CHG | CAG | CAG |
| 105 | CHG | CAG | CAG |
| 128 | CHG | CAG | CAG |
| 138 | CHG | CAG | CAG |
| 167 | CHG | CCG | CCG |
| 187 | CHG | CCG | CCG |
| 43  | CHH | CTC | CTC |
| 54  | CHH | CAA | CAA |
| 58  | CHH | CTT | CTT |
| 62  | CHH | CTC | CTC |
| 64  | CHH | CCC | CCC |
| 65  | CHH | CCA | CCA |
| 66  | CHH | CAA | CAA |
| 72  | CHH | CTT | CTT |
| 75  | CHH | CTA | CTA |
| 84  | CHH | CAT | CAT |
| 93  | CHH | CTC | CTC |
| 95  | CHH | CTA | CTA |
| 103 | CHH | CAC | CAC |
| 112 | CHH | CTC | CTC |
| 114 | CHH | CAT | CAT |
| 117 | CHH | CTC | CTC |
| 123 | CHH | CTT | CTT |
| 143 | CHH | CCT | CCT |
| 144 | CHH | CTT | CTT |
| 151 | CHH | CTT | CTT |
| 171 | CHH | CAA | CAA |

|     |     |     |     |
|-----|-----|-----|-----|
| 175 | CHH | CAA | CAA |
| 194 | CHH | CTA | CTA |
| 198 | CHH | CCC | CCC |
| 199 | CHH | CCA | CCA |
| 200 | CHH | CAA | CAA |
| 203 | CHH | CAT | CAT |
| 207 | CHH | CTC | CTC |
| 216 | CHH | CTA | CTA |
| 232 | CHH | CCC | CCC |
| 233 | CHH | CCC | CCC |
| 234 | CHH | CCC | CCC |
| 235 | CHH | CCA | CCA |

---

**Supplementary Table S3    Mapped data of bisulfite amplicon-Seq**

| Sample | locus    | genotype | Col_methylated | Col_unmethylated | Ler_methylated | Ler_unmethylated | Total_Mapped | Name         |
|--------|----------|----------|----------------|------------------|----------------|------------------|--------------|--------------|
| B-C12  | Region 1 | CC       | 60584          | 145460           | 232            | 653              | 206929       | Col_ind1     |
| B-C12  | Region 2 | CC       | 98313          | 232934           | 969            | 2508             | 334724       | Col_ind1     |
| B-D12  | Region 1 | CC       | 55795          | 200195           | 224            | 2631             | 258845       | Col_ind2     |
| B-D12  | Region 2 | CC       | 112102         | 278500           | 1309           | 3230             | 395141       | Col_ind2     |
| A-A01  | Region 2 | CL       | 44079          | 101759           | 35405          | 101772           | 283015       | ColLer_ind1  |
| A-B02  | Region 2 | CL       | 27517          | 61918            | 20907          | 59371            | 169713       | ColLer_ind10 |
| A-C02  | Region 2 | CL       | 22254          | 51441            | 17959          | 51875            | 143529       | ColLer_ind11 |
| A-D02  | Region 2 | CL       | 27087          | 61370            | 21472          | 61209            | 171138       | ColLer_ind12 |
| A-E02  | Region 2 | CL       | 22159          | 52310            | 16620          | 50327            | 141416       | ColLer_ind13 |
| A-F02  | Region 2 | CL       | 27462          | 63898            | 22108          | 61872            | 175340       | ColLer_ind14 |
| A-G02  | Region 2 | CL       | 37784          | 87281            | 27738          | 86812            | 239615       | ColLer_ind15 |
| A-H02  | Region 2 | CL       | 25411          | 57560            | 19549          | 58191            | 160711       | ColLer_ind16 |
| A-A03  | Region 2 | CL       | 42289          | 102805           | 34036          | 104544           | 283674       | ColLer_ind17 |
| A-B03  | Region 2 | CL       | 44826          | 103991           | 34717          | 101986           | 285520       | ColLer_ind18 |
| A-C03  | Region 2 | CL       | 46478          | 115605           | 33176          | 110575           | 305834       | ColLer_ind19 |
| A-B01  | Region 2 | CL       | 48695          | 115014           | 37770          | 113170           | 314649       | ColLer_ind2  |
| A-C01  | Region 2 | CL       | 51807          | 121478           | 38139          | 117254           | 328678       | ColLer_ind3  |
| A-D01  | Region 2 | CL       | 44119          | 105375           | 33898          | 104757           | 288149       | ColLer_ind4  |
| A-E01  | Region 2 | CL       | 38749          | 88734            | 30323          | 92707            | 250513       | ColLer_ind5  |
| A-F01  | Region 2 | CL       | 38223          | 92371            | 32065          | 94984            | 257643       | ColLer_ind6  |
| A-G01  | Region 2 | CL       | 40495          | 95772            | 34996          | 94181            | 265444       | ColLer_ind7  |

|       |          |    |       |        |       |        |        |                       |
|-------|----------|----|-------|--------|-------|--------|--------|-----------------------|
| A-H01 | Region 2 | CL | 39827 | 97472  | 33571 | 113183 | 284053 | ColLer_ind8           |
| A-A02 | Region 2 | CL | 23428 | 53804  | 17988 | 59684  | 154904 | ColLer_ind9           |
| A-A01 | Region 1 | CL | 4350  | 77063  | 1879  | 107518 | 190810 | ColLer_ind1           |
| A-B02 | Region 1 | CL | 3057  | 47065  | 676   | 58933  | 109731 | ColLer_ind10          |
| A-C02 | Region 1 | CL | 2860  | 40851  | 915   | 45609  | 90235  | ColLer_ind11          |
| A-D02 | Region 1 | CL | 2427  | 51020  | 614   | 55330  | 109391 | ColLer_ind12          |
| A-E02 | Region 1 | CL | 2988  | 35249  | 545   | 42977  | 81759  | ColLer_ind13          |
| A-F02 | Region 1 | CL | 2919  | 51389  | 1210  | 54813  | 110331 | ColLer_ind14          |
| A-G02 | Region 1 | CL | 2451  | 47494  | 667   | 62599  | 113211 | ColLer_ind15          |
| A-H02 | Region 1 | CL | 2940  | 35741  | 1160  | 44241  | 84082  | ColLer_ind16          |
| A-A03 | Region 1 | CL | 3629  | 84739  | 2391  | 80411  | 171170 | ColLer_ind17          |
| A-B03 | Region 1 | CL | 4828  | 74434  | 1422  | 89430  | 170114 | ColLer_ind18          |
| A-C03 | Region 1 | CL | 7081  | 80269  | 951   | 76220  | 164521 | ColLer_ind19          |
| A-B01 | Region 1 | CL | 3006  | 58950  | 797   | 75426  | 138179 | ColLer_ind2           |
| A-C01 | Region 1 | CL | 5293  | 61328  | 733   | 82484  | 149838 | ColLer_ind3           |
| A-D01 | Region 1 | CL | 5021  | 53933  | 1166  | 63981  | 124101 | ColLer_ind4           |
| A-E01 | Region 1 | CL | 2685  | 64180  | 860   | 70840  | 138565 | ColLer_ind5           |
| A-F01 | Region 1 | CL | 3917  | 53392  | 809   | 67289  | 125407 | ColLer_ind6           |
| A-G01 | Region 1 | CL | 3094  | 65847  | 1579  | 84695  | 155215 | ColLer_ind7           |
| A-H01 | Region 1 | CL | 3730  | 68304  | 1324  | 88335  | 161693 | ColLer_ind8           |
| A-A02 | Region 1 | CL | 3536  | 35018  | 1389  | 46942  | 86885  | ColLer_ind9           |
| A-F05 | Region 2 | LL | 1543  | 3577   | 90069 | 222037 | 317226 | ColLerF1_2_self_ind1  |
| A-G06 | Region 2 | CL | 42476 | 109653 | 35838 | 98112  | 286079 | ColLerF1_2_self_ind10 |

|       |          |    |        |        |       |        |        |                       |
|-------|----------|----|--------|--------|-------|--------|--------|-----------------------|
| A-H06 | Region 2 | LL | 1512   | 3456   | 75652 | 195910 | 276530 | ColLerF1_2_self_ind11 |
| A-A07 | Region 2 | CL | 53570  | 121169 | 39996 | 112111 | 326846 | ColLerF1_2_self_ind12 |
| A-B07 | Region 2 | CL | 54916  | 127019 | 46555 | 112188 | 340678 | ColLerF1_2_self_ind13 |
| A-C07 | Region 2 | CC | 100494 | 249501 | 1005  | 2611   | 353611 | ColLerF1_2_self_ind14 |
| A-D07 | Region 2 | LL | 2289   | 5033   | 84205 | 196385 | 287912 | ColLerF1_2_self_ind15 |
| A-E07 | Region 2 | LL | 1531   | 3610   | 74705 | 190042 | 269888 | ColLerF1_2_self_ind16 |
| A-F07 | Region 2 | LL | 2512   | 5897   | 94290 | 220588 | 323287 | ColLerF1_2_self_ind17 |
| A-G07 | Region 2 | CL | 46742  | 100685 | 39476 | 92500  | 279403 | ColLerF1_2_self_ind18 |
| A-H07 | Region 2 | CL | 49164  | 112794 | 45124 | 106334 | 313416 | ColLerF1_2_self_ind19 |
| A-G05 | Region 2 | LL | 1102   | 2649   | 68323 | 176930 | 249004 | ColLerF1_2_self_ind2  |
| A-A08 | Region 2 | CC | 57303  | 134938 | 597   | 1574   | 194412 | ColLerF1_2_self_ind20 |
| A-B08 | Region 2 | CL | 34786  | 77981  | 31359 | 71886  | 216012 | ColLerF1_2_self_ind21 |
| A-C08 | Region 2 | CL | 35091  | 80500  | 32360 | 76253  | 224204 | ColLerF1_2_self_ind22 |
| A-D08 | Region 2 | CL | 28861  | 64893  | 24431 | 59812  | 177997 | ColLerF1_2_self_ind23 |
| A-E08 | Region 2 | LL | 875    | 2109   | 51180 | 128175 | 182339 | ColLerF1_2_self_ind24 |
| A-F08 | Region 2 | LL | 1466   | 3251   | 51196 | 122617 | 178530 | ColLerF1_2_self_ind25 |
| A-G08 | Region 2 | CL | 30834  | 73186  | 26961 | 65020  | 196001 | ColLerF1_2_self_ind26 |
| A-H08 | Region 2 | CL | 27481  | 62956  | 25082 | 57642  | 173161 | ColLerF1_2_self_ind27 |
| A-A09 | Region 2 | LL | 1619   | 3687   | 88411 | 221705 | 315422 | ColLerF1_2_self_ind28 |
| A-B09 | Region 2 | LL | 1905   | 4121   | 97499 | 222072 | 325597 | ColLerF1_2_self_ind29 |
| A-H05 | Region 2 | CC | 78556  | 191242 | 1093  | 2733   | 273624 | ColLerF1_2_self_ind3  |
| A-C09 | Region 2 | CL | 60853  | 144497 | 55601 | 136599 | 397550 | ColLerF1_2_self_ind30 |
| A-A06 | Region 2 | LL | 1355   | 3130   | 80903 | 190057 | 275445 | ColLerF1_2_self_ind4  |

|       |          |    |       |        |        |        |        |                       |
|-------|----------|----|-------|--------|--------|--------|--------|-----------------------|
| A-B06 | Region 2 | LL | 1543  | 3483   | 83272  | 208211 | 296509 | ColLerF1_2_self_ind5  |
| A-C06 | Region 2 | LL | 1178  | 2791   | 79653  | 206298 | 289920 | ColLerF1_2_self_ind6  |
| A-D06 | Region 2 | CC | 83902 | 196421 | 943    | 2192   | 283458 | ColLerF1_2_self_ind7  |
| A-E06 | Region 2 | LL | 1085  | 2642   | 67192  | 174185 | 245104 | ColLerF1_2_self_ind8  |
| A-F06 | Region 2 | CL | 43587 | 103862 | 39350  | 95804  | 282603 | ColLerF1_2_self_ind9  |
| A-F05 | Region 1 | CL | 14354 | 101264 | 15914  | 65008  | 196540 | ColLerF1_2_self_ind1  |
| A-G06 | Region 1 | CL | 13508 | 96522  | 14236  | 58830  | 183096 | ColLerF1_2_self_ind10 |
| A-H06 | Region 1 | LL | 55    | 108    | 2415   | 184670 | 187248 | ColLerF1_2_self_ind11 |
| A-A07 | Region 1 | CL | 18788 | 98027  | 21350  | 62645  | 200810 | ColLerF1_2_self_ind12 |
| A-B07 | Region 1 | CL | 16701 | 64801  | 11806  | 74674  | 167982 | ColLerF1_2_self_ind13 |
| A-C07 | Region 1 | CL | 6670  | 61629  | 1954   | 59205  | 129458 | ColLerF1_2_self_ind14 |
| A-D07 | Region 1 | CL | 15731 | 71450  | 9783   | 71177  | 168141 | ColLerF1_2_self_ind15 |
| A-E07 | Region 1 | CL | 5336  | 72476  | 1458   | 70806  | 150076 | ColLerF1_2_self_ind16 |
| A-F07 | Region 1 | CL | 67773 | 73986  | 63248  | 56539  | 261546 | ColLerF1_2_self_ind17 |
| A-G07 | Region 1 | LL | 55    | 366    | 138665 | 128405 | 267491 | ColLerF1_2_self_ind18 |
| A-H07 | Region 1 | LL | 172   | 543    | 52908  | 102014 | 155637 | ColLerF1_2_self_ind19 |
| A-G05 | Region 1 | LL | 36    | 322    | 16468  | 134357 | 151183 | ColLerF1_2_self_ind2  |
| A-A08 | Region 1 | LL | 56    | 303    | 8292   | 101664 | 110315 | ColLerF1_2_self_ind20 |
| A-B08 | Region 1 | CC | 74550 | 79362  | 322    | 739    | 154973 | ColLerF1_2_self_ind21 |
| A-C08 | Region 1 | CL | 11755 | 42887  | 5808   | 44773  | 105223 | ColLerF1_2_self_ind22 |
| A-D08 | Region 1 | LL | 138   | 382    | 61470  | 71871  | 133861 | ColLerF1_2_self_ind23 |
| A-E08 | Region 1 | CL | 23018 | 47854  | 22975  | 34269  | 128116 | ColLerF1_2_self_ind24 |
| A-F08 | Region 1 | CC | 88415 | 80653  | 239    | 435    | 169742 | ColLerF1_2_self_ind25 |



|       |          |    |        |        |       |        |        |                       |
|-------|----------|----|--------|--------|-------|--------|--------|-----------------------|
| A-G08 | Region 1 | LL | 67     | 190    | 889   | 122428 | 123574 | ColLerF1_2_self_ind26 |
| A-H08 | Region 1 | LL | 95     | 199    | 44965 | 108278 | 153537 | ColLerF1_2_self_ind27 |
| A-A09 | Region 1 | CL | 18917  | 86061  | 18945 | 53940  | 177863 | ColLerF1_2_self_ind28 |
| A-B09 | Region 1 | CC | 23326  | 182428 | 151   | 739    | 206644 | ColLerF1_2_self_ind29 |
| A-H05 | Region 1 | LL | 67     | 388    | 24749 | 128883 | 154087 | ColLerF1_2_self_ind3  |
| A-C09 | Region 1 | CL | 7531   | 95796  | 2594  | 82513  | 188434 | ColLerF1_2_self_ind30 |
| A-A06 | Region 1 | CC | 118233 | 135280 | 213   | 775    | 254501 | ColLerF1_2_self_ind4  |
| A-B06 | Region 1 | LL | 109    | 284    | 1215  | 129036 | 130644 | ColLerF1_2_self_ind5  |
| A-C06 | Region 1 | CL | 10720  | 62095  | 9064  | 38858  | 120737 | ColLerF1_2_self_ind6  |
| A-D06 | Region 1 | LL | 74     | 351    | 14442 | 134596 | 149463 | ColLerF1_2_self_ind7  |
| A-E06 | Region 1 | CL | 17062  | 72055  | 16427 | 53404  | 158948 | ColLerF1_2_self_ind8  |
| A-F06 | Region 1 | CL | 6012   | 78594  | 891   | 76019  | 161516 | ColLerF1_2_self_ind9  |
| A-D09 | Region 2 | CL | 55361  | 124020 | 48631 | 118158 | 346170 | ColLerF1_4_self_ind1  |
| A-E10 | Region 2 | CC | 90561  | 223991 | 922   | 2398   | 317872 | ColLerF1_4_self_ind10 |
| A-F10 | Region 2 | CL | 49764  | 118443 | 39308 | 112080 | 319595 | ColLerF1_4_self_ind11 |
| A-G10 | Region 2 | CL | 47816  | 104603 | 39773 | 95721  | 287913 | ColLerF1_4_self_ind12 |
| A-H10 | Region 2 | CL | 33979  | 77628  | 29224 | 75055  | 215886 | ColLerF1_4_self_ind13 |
| A-A11 | Region 2 | CL | 46456  | 120116 | 41118 | 116717 | 324407 | ColLerF1_4_self_ind14 |
| A-B11 | Region 2 | CL | 50083  | 120313 | 41645 | 116399 | 328440 | ColLerF1_4_self_ind15 |
| A-C11 | Region 2 | CC | 105719 | 230058 | 669   | 1585   | 338031 | ColLerF1_4_self_ind16 |
| A-D11 | Region 2 | CL | 44399  | 101146 | 38254 | 97995  | 281794 | ColLerF1_4_self_ind17 |
| A-E11 | Region 2 | CL | 47087  | 108480 | 37947 | 106678 | 300192 | ColLerF1_4_self_ind18 |
| A-F11 | Region 2 | CL | 50124  | 124520 | 42342 | 122607 | 339593 | ColLerF1_4_self_ind19 |

|       |          |    |        |        |       |        |        |                       |
|-------|----------|----|--------|--------|-------|--------|--------|-----------------------|
| A-E09 | Region 2 | CC | 102735 | 254051 | 1160  | 2748   | 360694 | ColLerF1_4_self_ind2  |
| A-G11 | Region 2 | CL | 48603  | 111600 | 40541 | 107229 | 307973 | ColLerF1_4_self_ind20 |
| A-H11 | Region 2 | CL | 44342  | 99833  | 38592 | 105330 | 288097 | ColLerF1_4_self_ind21 |
| A-A12 | Region 2 | CC | 96618  | 236042 | 812   | 1888   | 335360 | ColLerF1_4_self_ind22 |
| A-B12 | Region 2 | CC | 109253 | 255827 | 831   | 1998   | 367909 | ColLerF1_4_self_ind23 |
| A-C12 | Region 2 | CL | 60153  | 129991 | 49130 | 127069 | 366343 | ColLerF1_4_self_ind24 |
| A-D12 | Region 2 | CC | 96466  | 245883 | 892   | 2431   | 345672 | ColLerF1_4_self_ind25 |
| A-E12 | Region 2 | CL | 49994  | 114816 | 41275 | 106332 | 312417 | ColLerF1_4_self_ind26 |
| A-F12 | Region 2 | CC | 106690 | 264598 | 1324  | 3261   | 375873 | ColLerF1_4_self_ind27 |
| A-G12 | Region 2 | CC | 106500 | 262134 | 1024  | 2443   | 372101 | ColLerF1_4_self_ind28 |
| A-F09 | Region 2 | CL | 53549  | 128982 | 46750 | 123792 | 353073 | ColLerF1_4_self_ind3  |
| A-G09 | Region 2 | LL | 1284   | 3211   | 88527 | 235378 | 328400 | ColLerF1_4_self_ind4  |
| A-H09 | Region 2 | CL | 48267  | 115671 | 40194 | 107954 | 312086 | ColLerF1_4_self_ind5  |
| A-A10 | Region 2 | CL | 42697  | 104009 | 34731 | 99431  | 280868 | ColLerF1_4_self_ind6  |
| A-B10 | Region 2 | CC | 78380  | 183031 | 893   | 2195   | 264499 | ColLerF1_4_self_ind7  |
| A-C10 | Region 2 | CL | 49194  | 120843 | 42131 | 113639 | 325807 | ColLerF1_4_self_ind8  |
| A-D10 | Region 2 | LL | 1464   | 3506   | 80606 | 206898 | 292474 | ColLerF1_4_self_ind9  |
| A-D09 | Region 1 | CL | 17419  | 93678  | 12483 | 79646  | 203226 | ColLerF1_4_self_ind1  |
| A-E10 | Region 1 | CL | 6029   | 90832  | 3162  | 67914  | 167937 | ColLerF1_4_self_ind10 |
| A-F10 | Region 1 | LL | 83     | 435    | 1834  | 160359 | 162711 | ColLerF1_4_self_ind11 |
| A-G10 | Region 1 | CL | 19069  | 62392  | 20243 | 81138  | 182842 | ColLerF1_4_self_ind12 |
| A-H10 | Region 1 | CL | 26118  | 48532  | 20432 | 42826  | 137908 | ColLerF1_4_self_ind13 |
| A-A11 | Region 1 | LL | 100    | 523    | 5175  | 145448 | 151246 | ColLerF1_4_self_ind14 |

|       |          |    |        |        |       |        |        |                       |
|-------|----------|----|--------|--------|-------|--------|--------|-----------------------|
| A-B11 | Region 1 | LL | 44     | 217    | 56122 | 158974 | 215357 | ColLerF1_4_self_ind15 |
| A-C11 | Region 1 | CL | 3149   | 73891  | 1014  | 81667  | 159721 | ColLerF1_4_self_ind16 |
| A-D11 | Region 1 | CL | 8533   | 61943  | 4093  | 67499  | 142068 | ColLerF1_4_self_ind17 |
| A-E11 | Region 1 | CL | 5274   | 74844  | 949   | 75087  | 156154 | ColLerF1_4_self_ind18 |
| A-F11 | Region 1 | CL | 4077   | 71314  | 1269  | 86042  | 162702 | ColLerF1_4_self_ind19 |
| A-E09 | Region 1 | CL | 29971  | 94935  | 26239 | 79474  | 230619 | ColLerF1_4_self_ind2  |
| A-G11 | Region 1 | CC | 32029  | 162393 | 156   | 661    | 195239 | ColLerF1_4_self_ind20 |
| A-H11 | Region 1 | CC | 102639 | 121279 | 332   | 983    | 225233 | ColLerF1_4_self_ind21 |
| A-A12 | Region 1 | LL | 111    | 312    | 4040  | 159511 | 163974 | ColLerF1_4_self_ind22 |
| A-B12 | Region 1 | CL | 13493  | 60087  | 10279 | 86937  | 170796 | ColLerF1_4_self_ind23 |
| A-C12 | Region 1 | CL | 41754  | 67675  | 35880 | 75860  | 221169 | ColLerF1_4_self_ind24 |
| A-D12 | Region 1 | LL | 137    | 320    | 12456 | 142560 | 155473 | ColLerF1_4_self_ind25 |
| A-E12 | Region 1 | CC | 125849 | 153833 | 336   | 719    | 280737 | ColLerF1_4_self_ind26 |
| A-F12 | Region 1 | CL | 20818  | 70469  | 15749 | 109072 | 216108 | ColLerF1_4_self_ind27 |
| A-G12 | Region 1 | CL | 10583  | 88516  | 6462  | 95309  | 200870 | ColLerF1_4_self_ind28 |
| A-F09 | Region 1 | CL | 20070  | 101992 | 12308 | 93960  | 228330 | ColLerF1_4_self_ind3  |
| A-G09 | Region 1 | CL | 72944  | 77390  | 77114 | 76969  | 304417 | ColLerF1_4_self_ind4  |
| A-H09 | Region 1 | CC | 74333  | 87432  | 388   | 672    | 162825 | ColLerF1_4_self_ind5  |
| A-A10 | Region 1 | CL | 17058  | 57840  | 12627 | 80115  | 167640 | ColLerF1_4_self_ind6  |
| A-B10 | Region 1 | CC | 65244  | 114753 | 197   | 603    | 180797 | ColLerF1_4_self_ind7  |
| A-C10 | Region 1 | CL | 3063   | 85111  | 1481  | 62078  | 151733 | ColLerF1_4_self_ind8  |
| A-D10 | Region 1 | CC | 87367  | 103385 | 202   | 494    | 191448 | ColLerF1_4_self_ind9  |
| B-E12 | Region 1 | LL | 36     | 192    | 1148  | 129467 | 130843 | Ler_ind1              |

|       |          |    |       |        |       |        |        |              |
|-------|----------|----|-------|--------|-------|--------|--------|--------------|
| B-E12 | Region 2 | LL | 1488  | 4303   | 47622 | 202958 | 256371 | Ler_ind1     |
| B-F12 | Region 1 | LL | 128   | 525    | 1567  | 179963 | 182183 | Ler_ind2     |
| B-F12 | Region 2 | LL | 1567  | 4952   | 57436 | 331267 | 395222 | Ler_ind2     |
| A-D03 | Region 1 | CL | 7856  | 71194  | 2700  | 75205  | 156955 | LerCol_ind1  |
| A-D03 | Region 2 | CL | 41089 | 98848  | 28616 | 100768 | 269321 | LerCol_ind1  |
| A-E04 | Region 1 | CL | 2249  | 22389  | 259   | 18789  | 43686  | LerCol_ind10 |
| A-E04 | Region 2 | CL | 14603 | 34564  | 9908  | 27498  | 86573  | LerCol_ind10 |
| A-F04 | Region 1 | CL | 5439  | 71533  | 1630  | 82884  | 161486 | LerCol_ind11 |
| A-F04 | Region 2 | CL | 42929 | 103565 | 29634 | 106816 | 282944 | LerCol_ind11 |
| A-G04 | Region 1 | CL | 7718  | 58692  | 1505  | 59378  | 127293 | LerCol_ind12 |
| A-G04 | Region 2 | CL | 34121 | 79189  | 22993 | 86043  | 222346 | LerCol_ind12 |
| A-H04 | Region 1 | CL | 4756  | 71480  | 1691  | 82057  | 159984 | LerCol_ind13 |
| A-H04 | Region 2 | CL | 35232 | 85702  | 26961 | 87206  | 235101 | LerCol_ind13 |
| A-A05 | Region 1 | CL | 6375  | 74822  | 1660  | 75509  | 158366 | LerCol_ind14 |
| A-A05 | Region 2 | CL | 48034 | 113041 | 33809 | 123317 | 318201 | LerCol_ind14 |
| A-B05 | Region 1 | CL | 5759  | 68585  | 1561  | 77996  | 153901 | LerCol_ind15 |
| A-B05 | Region 2 | CL | 43448 | 102549 | 38913 | 103505 | 288415 | LerCol_ind15 |
| A-C05 | Region 1 | CL | 4833  | 71676  | 1023  | 63616  | 141148 | LerCol_ind16 |
| A-C05 | Region 2 | CL | 45299 | 110926 | 33607 | 106938 | 296770 | LerCol_ind16 |
| A-D05 | Region 1 | CL | 7813  | 86431  | 1278  | 91731  | 187253 | LerCol_ind17 |
| A-D05 | Region 2 | CL | 48669 | 111892 | 32830 | 112660 | 306051 | LerCol_ind17 |
| A-E05 | Region 1 | CL | 5143  | 78621  | 1019  | 67280  | 152063 | LerCol_ind18 |
| A-E05 | Region 2 | CL | 40309 | 94195  | 29815 | 94454  | 258773 | LerCol_ind18 |

|       |          |    |       |        |       |        |        |                       |
|-------|----------|----|-------|--------|-------|--------|--------|-----------------------|
| A-E03 | Region 1 | CL | 7440  | 81343  | 1776  | 67976  | 158535 | LerCol_ind2           |
| A-E03 | Region 2 | CL | 42947 | 103156 | 28406 | 105882 | 280391 | LerCol_ind2           |
| A-F03 | Region 1 | CL | 4979  | 72681  | 829   | 85519  | 164008 | LerCol_ind3           |
| A-F03 | Region 2 | CL | 45722 | 104441 | 33152 | 106407 | 289722 | LerCol_ind3           |
| A-G03 | Region 1 | CL | 4218  | 65502  | 682   | 70688  | 141090 | LerCol_ind4           |
| A-G03 | Region 2 | CL | 42958 | 96987  | 28498 | 105148 | 273591 | LerCol_ind4           |
| A-H03 | Region 1 | CL | 5642  | 93405  | 1614  | 117658 | 218319 | LerCol_ind5           |
| A-H03 | Region 2 | CL | 41609 | 95677  | 35519 | 93205  | 266010 | LerCol_ind5           |
| A-A04 | Region 1 | CL | 4950  | 59617  | 1020  | 67066  | 132653 | LerCol_ind6           |
| A-A04 | Region 2 | CL | 38620 | 92369  | 27620 | 101169 | 259778 | LerCol_ind6           |
| A-B04 | Region 1 | CL | 6248  | 66723  | 1512  | 76779  | 151262 | LerCol_ind7           |
| A-B04 | Region 2 | CL | 40901 | 98560  | 27826 | 102908 | 270195 | LerCol_ind7           |
| A-C04 | Region 1 | CL | 4679  | 42219  | 2137  | 34795  | 83830  | LerCol_ind8           |
| A-C04 | Region 2 | CL | 19598 | 48555  | 13389 | 46828  | 128370 | LerCol_ind8           |
| A-D04 | Region 1 | CL | 4323  | 60683  | 590   | 65584  | 131180 | LerCol_ind9           |
| A-D04 | Region 2 | CL | 38047 | 91629  | 31721 | 87555  | 248952 | LerCol_ind9           |
| B-A01 | Region 2 | CL | 44835 | 113023 | 39037 | 99523  | 296418 | LerColF1_3_self_ind1  |
| B-B02 | Region 2 | CL | 35868 | 88309  | 32002 | 82792  | 238971 | LerColF1_3_self_ind10 |
| B-C02 | Region 2 | CL | 37909 | 95174  | 33211 | 85935  | 252229 | LerColF1_3_self_ind11 |
| B-D02 | Region 2 | LL | 1468  | 3204   | 64176 | 152887 | 221735 | LerColF1_3_self_ind12 |
| B-E02 | Region 2 | CL | 35612 | 91305  | 31198 | 84000  | 242115 | LerColF1_3_self_ind13 |
| B-F02 | Region 2 | CL | 38276 | 92200  | 36752 | 90890  | 258118 | LerColF1_3_self_ind14 |
| B-G02 | Region 2 | CC | 61068 | 134173 | 669   | 1543   | 197453 | LerColF1_3_self_ind15 |

|       |          |    |       |        |       |        |        |                       |
|-------|----------|----|-------|--------|-------|--------|--------|-----------------------|
| B-H02 | Region 2 | CL | 20295 | 46897  | 17990 | 44481  | 129663 | LerColF1_3_self_ind16 |
| B-A03 | Region 2 | LL | 1383  | 3042   | 91146 | 202530 | 298101 | LerColF1_3_self_ind17 |
| B-B03 | Region 2 | LL | 1554  | 3430   | 82818 | 183684 | 271486 | LerColF1_3_self_ind18 |
| B-C03 | Region 2 | CL | 48049 | 110404 | 41182 | 98333  | 297968 | LerColF1_3_self_ind19 |
| B-B01 | Region 2 | CC | 98752 | 246282 | 1258  | 3180   | 349472 | LerColF1_3_self_ind2  |
| B-D03 | Region 2 | CL | 42644 | 96168  | 37972 | 88504  | 265288 | LerColF1_3_self_ind20 |
| B-E03 | Region 2 | LL | 1164  | 2791   | 74233 | 190118 | 268306 | LerColF1_3_self_ind21 |
| B-F03 | Region 2 | LL | 1713  | 3737   | 83414 | 186680 | 275544 | LerColF1_3_self_ind22 |
| B-G03 | Region 2 | CL | 42650 | 98804  | 35898 | 86208  | 263560 | LerColF1_3_self_ind23 |
| B-H03 | Region 2 | CL | 43577 | 102570 | 38517 | 94995  | 279659 | LerColF1_3_self_ind24 |
| B-A04 | Region 2 | LL | 1142  | 2539   | 67489 | 164651 | 235821 | LerColF1_3_self_ind25 |
| B-B04 | Region 2 | LL | 1237  | 2899   | 71695 | 184840 | 260671 | LerColF1_3_self_ind26 |
| B-C04 | Region 2 | CL | 41350 | 103504 | 37530 | 96755  | 279139 | LerColF1_3_self_ind27 |
| B-D04 | Region 2 | CC | 71493 | 168390 | 846   | 1952   | 242681 | LerColF1_3_self_ind28 |
| B-E04 | Region 2 | LL | 1169  | 2730   | 74362 | 183012 | 261273 | LerColF1_3_self_ind29 |
| B-C01 | Region 2 | LL | 1526  | 3587   | 97680 | 238423 | 341216 | LerColF1_3_self_ind3  |
| B-F04 | Region 2 | CC | 72441 | 173600 | 875   | 2218   | 249134 | LerColF1_3_self_ind30 |
| B-D01 | Region 2 | CC | 98545 | 230669 | 910   | 2230   | 332354 | LerColF1_3_self_ind4  |
| B-E01 | Region 2 | CL | 50325 | 116834 | 41770 | 99053  | 307982 | LerColF1_3_self_ind5  |
| B-F01 | Region 2 | CL | 55606 | 128080 | 51979 | 124991 | 360656 | LerColF1_3_self_ind6  |
| B-G01 | Region 2 | CC | 91724 | 221207 | 1020  | 2547   | 316498 | LerColF1_3_self_ind7  |
| B-H01 | Region 2 | LL | 1938  | 4671   | 87231 | 210225 | 304065 | LerColF1_3_self_ind8  |
| B-A02 | Region 2 | CL | 37082 | 89030  | 35337 | 85499  | 246948 | LerColF1_3_self_ind9  |

|       |          |    |       |        |       |        |        |                       |
|-------|----------|----|-------|--------|-------|--------|--------|-----------------------|
| B-A01 | Region 1 | CC | 80156 | 169461 | 221   | 1089   | 250927 | LerColF1_3_self_ind1  |
| B-B02 | Region 1 | CL | 3398  | 36212  | 1531  | 47528  | 88669  | LerColF1_3_self_ind10 |
| B-C02 | Region 1 | CL | 33530 | 59622  | 36363 | 51661  | 181176 | LerColF1_3_self_ind11 |
| B-D02 | Region 1 | CL | 24885 | 53013  | 22375 | 52585  | 152858 | LerColF1_3_self_ind12 |
| B-E02 | Region 1 | LL | 102   | 254    | 21366 | 82921  | 104643 | LerColF1_3_self_ind13 |
| B-F02 | Region 1 | CL | 4864  | 64884  | 3062  | 63138  | 135948 | LerColF1_3_self_ind14 |
| B-G02 | Region 1 | LL | 131   | 325    | 69654 | 55749  | 125859 | LerColF1_3_self_ind15 |
| B-H02 | Region 1 | LL | 117   | 243    | 20594 | 50927  | 71881  | LerColF1_3_self_ind16 |
| B-A03 | Region 1 | CL | 25173 | 57431  | 16105 | 91169  | 189878 | LerColF1_3_self_ind17 |
| B-B03 | Region 1 | CL | 13418 | 19700  | 10121 | 22047  | 65286  | LerColF1_3_self_ind18 |
| B-C03 | Region 1 | CL | 30794 | 59947  | 21251 | 57818  | 169810 | LerColF1_3_self_ind19 |
| B-B01 | Region 1 | CL | 10575 | 79757  | 5425  | 96429  | 192186 | LerColF1_3_self_ind2  |
| B-D03 | Region 1 | CL | 12248 | 57609  | 6960  | 61614  | 138431 | LerColF1_3_self_ind20 |
| B-E03 | Region 1 | CC | 75364 | 133791 | 139   | 321    | 209615 | LerColF1_3_self_ind21 |
| B-F03 | Region 1 | CL | 7003  | 72184  | 1469  | 79650  | 160306 | LerColF1_3_self_ind22 |
| B-G03 | Region 1 | CC | 91952 | 128711 | 380   | 686    | 221729 | LerColF1_3_self_ind23 |
| B-H03 | Region 1 | CL | 6478  | 82967  | 6715  | 52091  | 148251 | LerColF1_3_self_ind24 |
| B-A04 | Region 1 | CC | 81851 | 87102  | 190   | 586    | 169729 | LerColF1_3_self_ind25 |
| B-B04 | Region 1 | LL | 160   | 326    | 17713 | 118020 | 136219 | LerColF1_3_self_ind26 |
| B-C04 | Region 1 | CL | 1810  | 40958  | 424   | 39247  | 82439  | LerColF1_3_self_ind27 |
| B-D04 | Region 1 | CC | 47102 | 89961  | 173   | 394    | 137630 | LerColF1_3_self_ind28 |
| B-E04 | Region 1 | CL | 5504  | 70875  | 1362  | 58169  | 135910 | LerColF1_3_self_ind29 |
| B-C01 | Region 1 | CL | 8379  | 100992 | 5699  | 76128  | 191198 | LerColF1_3_self_ind3  |

|       |          |    |        |        |       |        |        |                       |
|-------|----------|----|--------|--------|-------|--------|--------|-----------------------|
| B-F04 | Region 1 | CC | 52342  | 82251  | 166   | 439    | 135198 | LerColF1_3_self_ind30 |
| B-D01 | Region 1 | CL | 15167  | 86392  | 6707  | 88120  | 196386 | LerColF1_3_self_ind4  |
| B-E01 | Region 1 | CL | 15504  | 91754  | 15321 | 66646  | 189225 | LerColF1_3_self_ind5  |
| B-F01 | Region 1 | CC | 107431 | 149635 | 224   | 724    | 258014 | LerColF1_3_self_ind6  |
| B-G01 | Region 1 | CC | 75303  | 147705 | 241   | 501    | 223750 | LerColF1_3_self_ind7  |
| B-H01 | Region 1 | CL | 8641   | 89648  | 4128  | 107987 | 210404 | LerColF1_3_self_ind8  |
| B-A02 | Region 1 | LL | 30     | 263    | 3179  | 137099 | 140571 | LerColF1_3_self_ind9  |
| B-G04 | Region 2 | CL | 37484  | 95656  | 33452 | 89844  | 256436 | LerColF1_4_self_ind1  |
| B-A06 | Region 2 | LL | 1375   | 3205   | 81240 | 211019 | 296839 | LerColF1_4_self_ind11 |
| B-B06 | Region 2 | LL | 1254   | 2798   | 85162 | 206682 | 295896 | LerColF1_4_self_ind12 |
| B-C06 | Region 2 | CL | 49371  | 123535 | 44697 | 114976 | 332579 | LerColF1_4_self_ind13 |
| B-D06 | Region 2 | CL | 76322  | 185016 | 62356 | 183822 | 507516 | LerColF1_4_self_ind14 |
| B-E06 | Region 2 | CL | 44592  | 106905 | 38674 | 97076  | 287247 | LerColF1_4_self_ind15 |
| B-F06 | Region 2 | CL | 48383  | 117708 | 43652 | 107225 | 316968 | LerColF1_4_self_ind16 |
| B-G06 | Region 2 | CC | 51973  | 124361 | 644   | 1581   | 178559 | LerColF1_4_self_ind17 |
| B-H06 | Region 2 | CL | 41645  | 98712  | 37881 | 92325  | 270563 | LerColF1_4_self_ind18 |
| B-A07 | Region 2 | CC | 83026  | 220285 | 1102  | 3038   | 307451 | LerColF1_4_self_ind19 |
| B-H04 | Region 2 | CL | 28481  | 73202  | 26963 | 69664  | 198310 | LerColF1_4_self_ind2  |
| B-B07 | Region 2 | CL | 42939  | 104725 | 38575 | 97043  | 283282 | LerColF1_4_self_ind20 |
| B-C07 | Region 2 | LL | 1500   | 3911   | 76064 | 230615 | 312090 | LerColF1_4_self_ind21 |
| B-D07 | Region 2 | LL | 2120   | 5358   | 76453 | 225206 | 309137 | LerColF1_4_self_ind22 |
| B-E07 | Region 2 | CL | 40227  | 111192 | 36960 | 93523  | 281902 | LerColF1_4_self_ind23 |
| B-F07 | Region 2 | CL | 45340  | 114083 | 41336 | 106336 | 307095 | LerColF1_4_self_ind24 |



|       |          |    |       |        |       |        |        |                       |
|-------|----------|----|-------|--------|-------|--------|--------|-----------------------|
| B-G07 | Region 2 | LL | 1384  | 3399   | 69272 | 185501 | 259556 | LerColF1_4_self_ind25 |
| B-H07 | Region 2 | LL | 1642  | 4062   | 71436 | 205000 | 282140 | LerColF1_4_self_ind26 |
| B-A08 | Region 2 | CC | 59729 | 156476 | 691   | 1808   | 218704 | LerColF1_4_self_ind27 |
| B-B08 | Region 2 | CC | 55972 | 134710 | 556   | 1521   | 192759 | LerColF1_4_self_ind28 |
| B-C08 | Region 2 | LL | 1036  | 2390   | 58663 | 138252 | 200341 | LerColF1_4_self_ind29 |
| B-A05 | Region 2 | CC | 81823 | 190551 | 897   | 2232   | 275503 | LerColF1_4_self_ind3  |
| B-D08 | Region 2 | CL | 33823 | 78798  | 28638 | 69359  | 210618 | LerColF1_4_self_ind30 |
| B-B05 | Region 2 | CC | 89948 | 212744 | 748   | 1896   | 305336 | LerColF1_4_self_ind4  |
| B-C05 | Region 2 | CL | 45599 | 107295 | 40068 | 105722 | 298684 | LerColF1_4_self_ind5  |
| B-D05 | Region 2 | LL | 1931  | 4593   | 97491 | 234009 | 338024 | LerColF1_4_self_ind6  |
| B-E05 | Region 2 | CL | 44506 | 104878 | 41965 | 102287 | 293636 | LerColF1_4_self_ind7  |
| B-F05 | Region 2 | LL | 1787  | 4047   | 83655 | 208749 | 298238 | LerColF1_4_self_ind8  |
| B-G05 | Region 2 | CL | 42766 | 96421  | 37193 | 86521  | 262901 | LerColF1_4_self_ind9  |
| B-G04 | Region 1 | LL | 14    | 84     | 2059  | 103358 | 105515 | LerColF1_4_self_ind1  |
| B-A06 | Region 1 | LL | 76    | 346    | 1101  | 111813 | 113336 | LerColF1_4_self_ind11 |
| B-B06 | Region 1 | CL | 20353 | 64840  | 13064 | 70035  | 168292 | LerColF1_4_self_ind12 |
| B-C06 | Region 1 | CC | 47269 | 124509 | 124   | 446    | 172348 | LerColF1_4_self_ind13 |
| B-D06 | Region 1 | CL | 5674  | 63484  | 3805  | 50006  | 122969 | LerColF1_4_self_ind14 |
| B-E06 | Region 1 | CL | 5186  | 67292  | 1707  | 54737  | 128922 | LerColF1_4_self_ind15 |
| B-F06 | Region 1 | CC | 49257 | 113963 | 163   | 472    | 163855 | LerColF1_4_self_ind16 |
| B-G06 | Region 1 | CL | 7475  | 45845  | 5971  | 32841  | 92132  | LerColF1_4_self_ind17 |
| B-H06 | Region 1 | LL | 67    | 261    | 13964 | 138008 | 152300 | LerColF1_4_self_ind18 |
| B-A07 | Region 1 | CL | 17718 | 82150  | 16938 | 77895  | 194701 | LerColF1_4_self_ind19 |

|       |          |    |       |        |       |        |        |                       |
|-------|----------|----|-------|--------|-------|--------|--------|-----------------------|
| B-H04 | Region 1 | CC | 22633 | 91073  | 164   | 791    | 114661 | LerColF1_4_self_ind2  |
| B-B07 | Region 1 | CL | 21935 | 79636  | 21313 | 56552  | 179436 | LerColF1_4_self_ind20 |
| B-C07 | Region 1 | CL | 10019 | 69051  | 5390  | 57492  | 141952 | LerColF1_4_self_ind21 |
| B-D07 | Region 1 | LL | 12    | 216    | 978   | 118866 | 120072 | LerColF1_4_self_ind22 |
| B-E07 | Region 1 | LL | 34    | 92     | 4115  | 100539 | 104780 | LerColF1_4_self_ind23 |
| B-F07 | Region 1 | CL | 5594  | 80586  | 886   | 64588  | 151654 | LerColF1_4_self_ind24 |
| B-G07 | Region 1 | CC | 57180 | 144085 | 172   | 599    | 202036 | LerColF1_4_self_ind25 |
| B-H07 | Region 1 | CL | 9274  | 73722  | 3392  | 72557  | 158945 | LerColF1_4_self_ind26 |
| B-A08 | Region 1 | CC | 23386 | 105456 | 65    | 606    | 129513 | LerColF1_4_self_ind27 |
| B-B08 | Region 1 | LL | 44    | 217    | 1407  | 89602  | 91270  | LerColF1_4_self_ind28 |
| B-C08 | Region 1 | CL | 13650 | 47597  | 9622  | 45689  | 116558 | LerColF1_4_self_ind29 |
| B-A05 | Region 1 | CL | 6802  | 65809  | 2548  | 58339  | 133498 | LerColF1_4_self_ind3  |
| B-D08 | Region 1 | CL | 11162 | 34314  | 7514  | 35115  | 88105  | LerColF1_4_self_ind30 |
| B-B05 | Region 1 | CL | 22643 | 61984  | 20032 | 64645  | 169304 | LerColF1_4_self_ind4  |
| B-C05 | Region 1 | LL | 63    | 232    | 7483  | 102118 | 109896 | LerColF1_4_self_ind5  |
| B-D05 | Region 1 | LL | 63    | 263    | 5812  | 97952  | 104090 | LerColF1_4_self_ind6  |
| B-E05 | Region 1 | CC | 60919 | 78723  | 169   | 320    | 140131 | LerColF1_4_self_ind7  |
| B-F05 | Region 1 | CC | 61921 | 110176 | 158   | 626    | 172881 | LerColF1_4_self_ind8  |
| B-G05 | Region 1 | CL | 11358 | 59425  | 8316  | 52324  | 131423 | LerColF1_4_self_ind9  |

---

**Supplementary Table S4 Genotype of F<sub>2</sub> populations**

| Region   | Population                            |                 | Genotype |         |         | Total |
|----------|---------------------------------------|-----------------|----------|---------|---------|-------|
|          |                                       |                 | Col/Col  | Col/Ler | Ler/Ler |       |
| Region 1 | F <sub>2</sub> (Col x Ler ind.2 Self) | Observed        | 4        | 15      | 11      | 30    |
|          |                                       | Expected        | 7.5      | 15      | 7.5     | 30    |
|          |                                       | Chi-square      |          | 3.27    |         |       |
|          |                                       | <i>p</i> -value |          | 0.195   |         |       |
|          | F <sub>2</sub> (Col x Ler ind.4 Self) | Observed        | 6        | 17      | 5       | 28    |
|          |                                       | Expected        | 7        | 14      | 7       | 28    |
|          |                                       | Chi-square      |          | 1.36    |         |       |
|          |                                       | <i>p</i> -value |          | 0.507   |         |       |
|          | F <sub>2</sub> (Ler x Col ind.3 Self) | Observed        | 8        | 17      | 5       | 30    |
|          |                                       | Expected        | 7.5      | 15      | 7.5     | 30    |
|          |                                       | Chi-square      |          | 1.13    |         |       |
|          |                                       | <i>p</i> -value |          | 0.567   |         |       |
|          | F <sub>2</sub> (Ler x col ind.4 Self) | Observed        | 7        | 14      | 8       | 29    |
|          |                                       | Expected        | 7.25     | 14.5    | 7.25    | 29    |
|          |                                       | Chi-square      |          | 0.10    |         |       |
|          |                                       | <i>p</i> -value |          | 0.950   |         |       |
|          | F <sub>2</sub> (Col x Ler ind.2 Self) | Observed        | 4        | 12      | 14      | 30    |
|          |                                       | Expected        | 7.5      | 15      | 7.5     | 30    |
|          |                                       | Chi-square      |          | 7.87    |         |       |
|          |                                       | <i>p</i> -value |          | 0.0196  |         |       |
|          | F <sub>2</sub> (Col x Ler ind.4 Self) | Observed        | 9        | 17      | 2       | 28    |
|          |                                       | Expected        | 7        | 14      | 7       | 28    |
|          |                                       | Chi-square      |          | 4.79    |         |       |
|          |                                       | <i>p</i> -value |          | 0.0914  |         |       |
|          | F <sub>2</sub> (Ler x Col ind.3 Self) | Observed        | 6        | 14      | 10      | 30    |
|          |                                       | Expected        | 7.5      | 15      | 7.5     | 30    |
|          |                                       | Chi-square      |          | 1.20    |         |       |
|          |                                       | <i>p</i> -value |          | 0.549   |         |       |
|          | F <sub>2</sub> (Ler x col ind.4 Self) | Observed        | 6        | 14      | 9       | 29    |
|          |                                       | Expected        | 7.25     | 14.5    | 7.25    | 29    |
|          |                                       | Chi-square      |          | 0.66    |         |       |
|          |                                       | <i>p</i> -value |          | 0.721   |         |       |

**Supplementary Table S5    Level of DNA methylation**

| <b>Methylation level</b> | <b>Motif</b> | <b>Allele</b> | <b>Genotype</b> | <b>Locus</b> | <b>Name</b> | <b>Group</b> |
|--------------------------|--------------|---------------|-----------------|--------------|-------------|--------------|
| 0.717263581              | CG           | Col           | CC              | Region 1     | B-C12       | Parent       |
| 0.420333164              | CHG          | Col           | CC              | Region 1     | B-C12       | Parent       |
| 0.211483334              | CHH          | Col           | CC              | Region 1     | B-C12       | Parent       |
| 0.879665171              | CG           | Col           | CC              | Region 2     | B-C12       | Parent       |
| 0.518320083              | CHG          | Col           | CC              | Region 2     | B-C12       | Parent       |
| 0.079522881              | CHH          | Col           | CC              | Region 2     | B-C12       | Parent       |
| 0.624003629              | CG           | Col           | CC              | Region 1     | B-D12       | Parent       |
| 0.339938207              | CHG          | Col           | CC              | Region 1     | B-D12       | Parent       |
| 0.140719319              | CHH          | Col           | CC              | Region 1     | B-D12       | Parent       |
| 0.841668755              | CG           | Col           | CC              | Region 2     | B-D12       | Parent       |
| 0.506945316              | CHG          | Col           | CC              | Region 2     | B-D12       | Parent       |
| 0.078664375              | CHH          | Col           | CC              | Region 2     | B-D12       | Parent       |
| 0.005520287              | CG           | Ler           | LL              | Region 1     | B-E12       | Parent       |
| 0.008696125              | CHG          | Ler           | LL              | Region 1     | B-E12       | Parent       |
| 0.00900543               | CHH          | Ler           | LL              | Region 1     | B-E12       | Parent       |
| 0.660951489              | CG           | Ler           | LL              | Region 2     | B-E12       | Parent       |
| 0.301104342              | CHG          | Ler           | LL              | Region 2     | B-E12       | Parent       |
| 0.026652907              | CHH          | Ler           | LL              | Region 2     | B-E12       | Parent       |
| 0.008155147              | CG           | Ler           | LL              | Region 1     | B-F12       | Parent       |
| 0.008455997              | CHG          | Ler           | LL              | Region 1     | B-F12       | Parent       |
| 0.008674949              | CHH          | Ler           | LL              | Region 1     | B-F12       | Parent       |
| 0.564532392              | CG           | Ler           | LL              | Region 2     | B-F12       | Parent       |
| 0.175210807              | CHG          | Ler           | LL              | Region 2     | B-F12       | Parent       |
| 0.016405283              | CHH          | Ler           | LL              | Region 2     | B-F12       | Parent       |
| 0.374442191              | CG           | Col           | CL              | Region 1     | A-A01       | ColLer       |
| 0.076467765              | CHG          | Col           | CL              | Region 1     | A-A01       | ColLer       |
| 0.017163441              | CHH          | Col           | CL              | Region 1     | A-A01       | ColLer       |
| 0.042602378              | CG           | Ler           | CL              | Region 1     | A-A01       | ColLer       |
| 0.016430705              | CHG          | Ler           | CL              | Region 1     | A-A01       | ColLer       |
| 0.010053282              | CHH          | Ler           | CL              | Region 1     | A-A01       | ColLer       |
| 0.911756811              | CG           | Col           | CL              | Region 2     | A-A01       | ColLer       |
| 0.525425627              | CHG          | Col           | CL              | Region 2     | A-A01       | ColLer       |
| 0.076616723              | CHH          | Col           | CL              | Region 2     | A-A01       | ColLer       |
| 0.835928314              | CG           | Ler           | CL              | Region 2     | A-A01       | ColLer       |

|             |     |     |    |          |       |        |
|-------------|-----|-----|----|----------|-------|--------|
| 0.433097124 | CHG | Ler | CL | Region 2 | A-A01 | ColLer |
| 0.05058821  | CHH | Ler | CL | Region 2 | A-A01 | ColLer |
| 0.332177161 | CG  | Col | CL | Region 1 | A-B01 | ColLer |
| 0.072066394 | CHG | Col | CL | Region 1 | A-B01 | ColLer |
| 0.015843559 | CHH | Col | CL | Region 1 | A-B01 | ColLer |
| 0.016844603 | CG  | Ler | CL | Region 1 | A-B01 | ColLer |
| 0.012399776 | CHG | Ler | CL | Region 1 | A-B01 | ColLer |
| 0.008819469 | CHH | Ler | CL | Region 1 | A-B01 | ColLer |
| 0.881522682 | CG  | Col | CL | Region 2 | A-B01 | ColLer |
| 0.530296219 | CHG | Col | CL | Region 2 | A-B01 | ColLer |
| 0.078008073 | CHH | Col | CL | Region 2 | A-B01 | ColLer |
| 0.805911681 | CG  | Ler | CL | Region 2 | A-B01 | ColLer |
| 0.429661705 | CHG | Ler | CL | Region 2 | A-B01 | ColLer |
| 0.048623212 | CHH | Ler | CL | Region 2 | A-B01 | ColLer |
| 0.49950446  | CG  | Col | CL | Region 1 | A-C01 | ColLer |
| 0.143318017 | CHG | Col | CL | Region 1 | A-C01 | ColLer |
| 0.022143088 | CHH | Col | CL | Region 1 | A-C01 | ColLer |
| 0.014069264 | CG  | Ler | CL | Region 1 | A-C01 | ColLer |
| 0.009046684 | CHG | Ler | CL | Region 1 | A-C01 | ColLer |
| 0.008124858 | CHH | Ler | CL | Region 1 | A-C01 | ColLer |
| 0.904677224 | CG  | Col | CL | Region 2 | A-C01 | ColLer |
| 0.524305719 | CHG | Col | CL | Region 2 | A-C01 | ColLer |
| 0.07404391  | CHH | Col | CL | Region 2 | A-C01 | ColLer |
| 0.813446225 | CG  | Ler | CL | Region 2 | A-C01 | ColLer |
| 0.412154348 | CHG | Ler | CL | Region 2 | A-C01 | ColLer |
| 0.042592451 | CHH | Ler | CL | Region 2 | A-C01 | ColLer |
| 0.464285714 | CG  | Col | CL | Region 1 | A-D01 | ColLer |
| 0.154229407 | CHG | Col | CL | Region 1 | A-D01 | ColLer |
| 0.030927835 | CHH | Col | CL | Region 1 | A-D01 | ColLer |
| 0.045643154 | CG  | Ler | CL | Region 1 | A-D01 | ColLer |
| 0.016243323 | CHG | Ler | CL | Region 1 | A-D01 | ColLer |
| 0.011675029 | CHH | Ler | CL | Region 1 | A-D01 | ColLer |
| 0.883788552 | CG  | Col | CL | Region 2 | A-D01 | ColLer |
| 0.511262985 | CHG | Col | CL | Region 2 | A-D01 | ColLer |
| 0.076712792 | CHH | Col | CL | Region 2 | A-D01 | ColLer |
| 0.790075124 | CG  | Ler | CL | Region 2 | A-D01 | ColLer |

|             |     |     |    |          |       |        |
|-------------|-----|-----|----|----------|-------|--------|
| 0.404676365 | CHG | Ler | CL | Region 2 | A-D01 | ColLer |
| 0.049570836 | CHH | Ler | CL | Region 2 | A-D01 | ColLer |
| 0.296689723 | CG  | Col | CL | Region 1 | A-E01 | ColLer |
| 0.046020627 | CHG | Col | CL | Region 1 | A-E01 | ColLer |
| 0.014722001 | CHH | Col | CL | Region 1 | A-E01 | ColLer |
| 0.023063424 | CG  | Ler | CL | Region 1 | A-E01 | ColLer |
| 0.011399683 | CHG | Ler | CL | Region 1 | A-E01 | ColLer |
| 0.009008812 | CHH | Ler | CL | Region 1 | A-E01 | ColLer |
| 0.900134177 | CG  | Col | CL | Region 2 | A-E01 | ColLer |
| 0.529539921 | CHG | Col | CL | Region 2 | A-E01 | ColLer |
| 0.08165097  | CHH | Col | CL | Region 2 | A-E01 | ColLer |
| 0.80604954  | CG  | Ler | CL | Region 2 | A-E01 | ColLer |
| 0.411491507 | CHG | Ler | CL | Region 2 | A-E01 | ColLer |
| 0.046094364 | CHH | Ler | CL | Region 2 | A-E01 | ColLer |
| 0.400230681 | CG  | Col | CL | Region 1 | A-F01 | ColLer |
| 0.116101888 | CHG | Col | CL | Region 1 | A-F01 | ColLer |
| 0.023421435 | CHH | Col | CL | Region 1 | A-F01 | ColLer |
| 0.024370861 | CG  | Ler | CL | Region 1 | A-F01 | ColLer |
| 0.014822547 | CHG | Ler | CL | Region 1 | A-F01 | ColLer |
| 0.008771525 | CHH | Ler | CL | Region 1 | A-F01 | ColLer |
| 0.880760024 | CG  | Col | CL | Region 2 | A-F01 | ColLer |
| 0.507449606 | CHG | Col | CL | Region 2 | A-F01 | ColLer |
| 0.074736579 | CHH | Col | CL | Region 2 | A-F01 | ColLer |
| 0.807843288 | CG  | Ler | CL | Region 2 | A-F01 | ColLer |
| 0.435851242 | CHG | Ler | CL | Region 2 | A-F01 | ColLer |
| 0.05027946  | CHH | Ler | CL | Region 2 | A-F01 | ColLer |
| 0.348441247 | CG  | Col | CL | Region 1 | A-G01 | ColLer |
| 0.058867925 | CHG | Col | CL | Region 1 | A-G01 | ColLer |
| 0.013359455 | CHH | Col | CL | Region 1 | A-G01 | ColLer |
| 0.077965395 | CG  | Ler | CL | Region 1 | A-G01 | ColLer |
| 0.020610058 | CHG | Ler | CL | Region 1 | A-G01 | ColLer |
| 0.008050709 | CHH | Ler | CL | Region 1 | A-G01 | ColLer |
| 0.906805531 | CG  | Col | CL | Region 2 | A-G01 | ColLer |
| 0.519126994 | CHG | Col | CL | Region 2 | A-G01 | ColLer |
| 0.071798393 | CHH | Col | CL | Region 2 | A-G01 | ColLer |
| 0.870279892 | CG  | Ler | CL | Region 2 | A-G01 | ColLer |

|             |     |     |    |          |       |        |
|-------------|-----|-----|----|----------|-------|--------|
| 0.452770582 | CHG | Ler | CL | Region 2 | A-G01 | ColLer |
| 0.055806036 | CHH | Ler | CL | Region 2 | A-G01 | ColLer |
| 0.360284013 | CG  | Col | CL | Region 1 | A-H01 | ColLer |
| 0.074977416 | CHG | Col | CL | Region 1 | A-H01 | ColLer |
| 0.017499052 | CHH | Col | CL | Region 1 | A-H01 | ColLer |
| 0.046413502 | CG  | Ler | CL | Region 1 | A-H01 | ColLer |
| 0.016876634 | CHG | Ler | CL | Region 1 | A-H01 | ColLer |
| 0.008044728 | CHH | Ler | CL | Region 1 | A-H01 | ColLer |
| 0.882916578 | CG  | Col | CL | Region 2 | A-H01 | ColLer |
| 0.504533524 | CHG | Col | CL | Region 2 | A-H01 | ColLer |
| 0.071187541 | CHH | Col | CL | Region 2 | A-H01 | ColLer |
| 0.762494162 | CG  | Ler | CL | Region 2 | A-H01 | ColLer |
| 0.391710709 | CHG | Ler | CL | Region 2 | A-H01 | ColLer |
| 0.037195227 | CHH | Ler | CL | Region 2 | A-H01 | ColLer |
| 0.503442341 | CG  | Col | CL | Region 1 | A-A02 | ColLer |
| 0.172636225 | CHG | Col | CL | Region 1 | A-A02 | ColLer |
| 0.0310522   | CHH | Col | CL | Region 1 | A-A02 | ColLer |
| 0.073243647 | CG  | Ler | CL | Region 1 | A-A02 | ColLer |
| 0.031360424 | CHG | Ler | CL | Region 1 | A-A02 | ColLer |
| 0.016681299 | CHH | Ler | CL | Region 1 | A-A02 | ColLer |
| 0.913255608 | CG  | Col | CL | Region 2 | A-A02 | ColLer |
| 0.523860021 | CHG | Col | CL | Region 2 | A-A02 | ColLer |
| 0.078335256 | CHH | Col | CL | Region 2 | A-A02 | ColLer |
| 0.770072304 | CG  | Ler | CL | Region 2 | A-A02 | ColLer |
| 0.392113565 | CHG | Ler | CL | Region 2 | A-A02 | ColLer |
| 0.038483619 | CHH | Ler | CL | Region 2 | A-A02 | ColLer |
| 0.363365353 | CG  | Col | CL | Region 1 | A-B02 | ColLer |
| 0.104169373 | CHG | Col | CL | Region 1 | A-B02 | ColLer |
| 0.022617819 | CHH | Col | CL | Region 1 | A-B02 | ColLer |
| 0.019951632 | CG  | Ler | CL | Region 1 | A-B02 | ColLer |
| 0.009781701 | CHG | Ler | CL | Region 1 | A-B02 | ColLer |
| 0.009546414 | CHH | Ler | CL | Region 1 | A-B02 | ColLer |
| 0.909974872 | CG  | Col | CL | Region 2 | A-B02 | ColLer |
| 0.519963454 | CHG | Col | CL | Region 2 | A-B02 | ColLer |
| 0.085856236 | CHH | Col | CL | Region 2 | A-B02 | ColLer |
| 0.818614296 | CG  | Ler | CL | Region 2 | A-B02 | ColLer |

|             |     |     |    |          |       |        |
|-------------|-----|-----|----|----------|-------|--------|
| 0.440924832 | CHG | Ler | CL | Region 2 | A-B02 | ColLer |
| 0.058375259 | CHH | Ler | CL | Region 2 | A-B02 | ColLer |
| 0.440620272 | CG  | Col | CL | Region 1 | A-C02 | ColLer |
| 0.089269747 | CHG | Col | CL | Region 1 | A-C02 | ColLer |
| 0.023105239 | CHH | Col | CL | Region 1 | A-C02 | ColLer |
| 0.049129594 | CG  | Ler | CL | Region 1 | A-C02 | ColLer |
| 0.02293578  | CHG | Ler | CL | Region 1 | A-C02 | ColLer |
| 0.010740703 | CHH | Ler | CL | Region 1 | A-C02 | ColLer |
| 0.91893864  | CG  | Col | CL | Region 2 | A-C02 | ColLer |
| 0.52672347  | CHG | Col | CL | Region 2 | A-C02 | ColLer |
| 0.073433907 | CHH | Col | CL | Region 2 | A-C02 | ColLer |
| 0.831714984 | CG  | Ler | CL | Region 2 | A-C02 | ColLer |
| 0.445317079 | CHG | Ler | CL | Region 2 | A-C02 | ColLer |
| 0.047970715 | CHH | Ler | CL | Region 2 | A-C02 | ColLer |
| 0.316666667 | CG  | Col | CL | Region 1 | A-D02 | ColLer |
| 0.050773164 | CHG | Col | CL | Region 1 | A-D02 | ColLer |
| 0.018609654 | CHH | Col | CL | Region 1 | A-D02 | ColLer |
| 0.014567821 | CG  | Ler | CL | Region 1 | A-D02 | ColLer |
| 0.011684023 | CHG | Ler | CL | Region 1 | A-D02 | ColLer |
| 0.009373334 | CHH | Ler | CL | Region 1 | A-D02 | ColLer |
| 0.9024808   | CG  | Col | CL | Region 2 | A-D02 | ColLer |
| 0.519125683 | CHG | Col | CL | Region 2 | A-D02 | ColLer |
| 0.086433848 | CHH | Col | CL | Region 2 | A-D02 | ColLer |
| 0.807057989 | CG  | Ler | CL | Region 2 | A-D02 | ColLer |
| 0.439549585 | CHG | Ler | CL | Region 2 | A-D02 | ColLer |
| 0.060551052 | CHH | Ler | CL | Region 2 | A-D02 | ColLer |
| 0.482922611 | CG  | Col | CL | Region 1 | A-E02 | ColLer |
| 0.13519496  | CHG | Col | CL | Region 1 | A-E02 | ColLer |
| 0.023864106 | CHH | Col | CL | Region 1 | A-E02 | ColLer |
| 0.023563456 | CG  | Ler | CL | Region 1 | A-E02 | ColLer |
| 0.012254902 | CHG | Ler | CL | Region 1 | A-E02 | ColLer |
| 0.009240543 | CHH | Ler | CL | Region 1 | A-E02 | ColLer |
| 0.910748246 | CG  | Col | CL | Region 2 | A-E02 | ColLer |
| 0.516897081 | CHG | Col | CL | Region 2 | A-E02 | ColLer |
| 0.071049375 | CHH | Col | CL | Region 2 | A-E02 | ColLer |
| 0.820486668 | CG  | Ler | CL | Region 2 | A-E02 | ColLer |



|             |     |     |    |          |       |        |
|-------------|-----|-----|----|----------|-------|--------|
| 0.420039005 | CHG | Ler | CL | Region 2 | A-E02 | ColLer |
| 0.042475674 | CHH | Ler | CL | Region 2 | A-E02 | ColLer |
| 0.373020706 | CG  | Col | CL | Region 1 | A-F02 | ColLer |
| 0.075779376 | CHG | Col | CL | Region 1 | A-F02 | ColLer |
| 0.017888804 | CHH | Col | CL | Region 1 | A-F02 | ColLer |
| 0.054533721 | CG  | Ler | CL | Region 1 | A-F02 | ColLer |
| 0.02310231  | CHG | Ler | CL | Region 1 | A-F02 | ColLer |
| 0.013211781 | CHH | Ler | CL | Region 1 | A-F02 | ColLer |
| 0.916880342 | CG  | Col | CL | Region 2 | A-F02 | ColLer |
| 0.531264017 | CHG | Col | CL | Region 2 | A-F02 | ColLer |
| 0.071166043 | CHH | Col | CL | Region 2 | A-F02 | ColLer |
| 0.858273214 | CG  | Ler | CL | Region 2 | A-F02 | ColLer |
| 0.447630193 | CHG | Ler | CL | Region 2 | A-F02 | ColLer |
| 0.048922848 | CHH | Ler | CL | Region 2 | A-F02 | ColLer |
| 0.348414795 | CG  | Col | CL | Region 1 | A-G02 | ColLer |
| 0.063793777 | CHG | Col | CL | Region 1 | A-G02 | ColLer |
| 0.016724237 | CHH | Col | CL | Region 1 | A-G02 | ColLer |
| 0.02853067  | CG  | Ler | CL | Region 1 | A-G02 | ColLer |
| 0.009762118 | CHG | Ler | CL | Region 1 | A-G02 | ColLer |
| 0.008196721 | CHH | Ler | CL | Region 1 | A-G02 | ColLer |
| 0.897267503 | CG  | Col | CL | Region 2 | A-G02 | ColLer |
| 0.533071895 | CHG | Col | CL | Region 2 | A-G02 | ColLer |
| 0.079291543 | CHH | Col | CL | Region 2 | A-G02 | ColLer |
| 0.771232351 | CG  | Ler | CL | Region 2 | A-G02 | ColLer |
| 0.429416376 | CHG | Ler | CL | Region 2 | A-G02 | ColLer |
| 0.047123544 | CHH | Ler | CL | Region 2 | A-G02 | ColLer |
| 0.469457497 | CG  | Col | CL | Region 1 | A-H02 | ColLer |
| 0.135198921 | CHG | Col | CL | Region 1 | A-H02 | ColLer |
| 0.023767965 | CHH | Col | CL | Region 1 | A-H02 | ColLer |
| 0.070747218 | CG  | Ler | CL | Region 1 | A-H02 | ColLer |
| 0.031313606 | CHG | Ler | CL | Region 1 | A-H02 | ColLer |
| 0.012255072 | CHH | Ler | CL | Region 1 | A-H02 | ColLer |
| 0.908898055 | CG  | Col | CL | Region 2 | A-H02 | ColLer |
| 0.542589857 | CHG | Col | CL | Region 2 | A-H02 | ColLer |
| 0.080151852 | CHH | Col | CL | Region 2 | A-H02 | ColLer |
| 0.816318833 | CG  | Ler | CL | Region 2 | A-H02 | ColLer |

|             |     |     |    |          |       |        |
|-------------|-----|-----|----|----------|-------|--------|
| 0.427370191 | CHG | Ler | CL | Region 2 | A-H02 | ColLer |
| 0.047731009 | CHH | Ler | CL | Region 2 | A-H02 | ColLer |
| 0.291424282 | CG  | Col | CL | Region 1 | A-A03 | ColLer |
| 0.054888381 | CHG | Col | CL | Region 1 | A-A03 | ColLer |
| 0.013948725 | CHH | Col | CL | Region 1 | A-A03 | ColLer |
| 0.096393443 | CG  | Ler | CL | Region 1 | A-A03 | ColLer |
| 0.041684572 | CHG | Ler | CL | Region 1 | A-A03 | ColLer |
| 0.012081097 | CHH | Ler | CL | Region 1 | A-A03 | ColLer |
| 0.887112517 | CG  | Col | CL | Region 2 | A-A03 | ColLer |
| 0.51888175  | CHG | Col | CL | Region 2 | A-A03 | ColLer |
| 0.068886408 | CHH | Col | CL | Region 2 | A-A03 | ColLer |
| 0.795601917 | CG  | Ler | CL | Region 2 | A-A03 | ColLer |
| 0.427257722 | CHG | Ler | CL | Region 2 | A-A03 | ColLer |
| 0.045174714 | CHH | Ler | CL | Region 2 | A-A03 | ColLer |
| 0.397580309 | CG  | Col | CL | Region 1 | A-B03 | ColLer |
| 0.095880273 | CHG | Col | CL | Region 1 | A-B03 | ColLer |
| 0.019150904 | CHH | Col | CL | Region 1 | A-B03 | ColLer |
| 0.033763654 | CG  | Ler | CL | Region 1 | A-B03 | ColLer |
| 0.017935464 | CHG | Ler | CL | Region 1 | A-B03 | ColLer |
| 0.010650806 | CHH | Ler | CL | Region 1 | A-B03 | ColLer |
| 0.905018392 | CG  | Col | CL | Region 2 | A-B03 | ColLer |
| 0.533238027 | CHG | Col | CL | Region 2 | A-B03 | ColLer |
| 0.075574721 | CHH | Col | CL | Region 2 | A-B03 | ColLer |
| 0.818110321 | CG  | Ler | CL | Region 2 | A-B03 | ColLer |
| 0.441684085 | CHG | Ler | CL | Region 2 | A-B03 | ColLer |
| 0.048214907 | CHH | Ler | CL | Region 2 | A-B03 | ColLer |
| 0.509878419 | CG  | Col | CL | Region 1 | A-C03 | ColLer |
| 0.140029873 | CHG | Col | CL | Region 1 | A-C03 | ColLer |
| 0.024105306 | CHH | Col | CL | Region 1 | A-C03 | ColLer |
| 0.021988304 | CG  | Ler | CL | Region 1 | A-C03 | ColLer |
| 0.012254676 | CHG | Ler | CL | Region 1 | A-C03 | ColLer |
| 0.008648935 | CHH | Ler | CL | Region 1 | A-C03 | ColLer |
| 0.892270109 | CG  | Col | CL | Region 2 | A-C03 | ColLer |
| 0.493520246 | CHG | Col | CL | Region 2 | A-C03 | ColLer |
| 0.065135891 | CHH | Col | CL | Region 2 | A-C03 | ColLer |
| 0.77801563  | CG  | Ler | CL | Region 2 | A-C03 | ColLer |

|             |     |     |    |          |       |        |
|-------------|-----|-----|----|----------|-------|--------|
| 0.388276097 | CHG | Ler | CL | Region 2 | A-C03 | ColLer |
| 0.035665181 | CHH | Ler | CL | Region 2 | A-C03 | ColLer |
| 0.542138365 | CG  | Col | CL | Region 1 | A-D03 | LerCol |
| 0.18649385  | CHG | Col | CL | Region 1 | A-D03 | LerCol |
| 0.033780346 | CHH | Col | CL | Region 1 | A-D03 | LerCol |
| 0.084781098 | CG  | Ler | CL | Region 1 | A-D03 | LerCol |
| 0.042085083 | CHG | Ler | CL | Region 1 | A-D03 | LerCol |
| 0.015976761 | CHH | Ler | CL | Region 1 | A-D03 | LerCol |
| 0.91613399  | CG  | Col | CL | Region 2 | A-D03 | LerCol |
| 0.504500818 | CHG | Col | CL | Region 2 | A-D03 | LerCol |
| 0.066137285 | CHH | Col | CL | Region 2 | A-D03 | LerCol |
| 0.755176062 | CG  | Ler | CL | Region 2 | A-D03 | LerCol |
| 0.356777897 | CHG | Ler | CL | Region 2 | A-D03 | LerCol |
| 0.034136592 | CHH | Ler | CL | Region 2 | A-D03 | LerCol |
| 0.468820015 | CG  | Col | CL | Region 1 | A-E03 | LerCol |
| 0.150257164 | CHG | Col | CL | Region 1 | A-E03 | LerCol |
| 0.029285657 | CHH | Col | CL | Region 1 | A-E03 | LerCol |
| 0.064282011 | CG  | Ler | CL | Region 1 | A-E03 | LerCol |
| 0.02767848  | CHG | Ler | CL | Region 1 | A-E03 | LerCol |
| 0.013757853 | CHH | Ler | CL | Region 1 | A-E03 | LerCol |
| 0.893001638 | CG  | Col | CL | Region 2 | A-E03 | LerCol |
| 0.514388086 | CHG | Col | CL | Region 2 | A-E03 | LerCol |
| 0.071707516 | CHH | Col | CL | Region 2 | A-E03 | LerCol |
| 0.725795901 | CG  | Ler | CL | Region 2 | A-E03 | LerCol |
| 0.343871595 | CHG | Ler | CL | Region 2 | A-E03 | LerCol |
| 0.030768379 | CHH | Ler | CL | Region 2 | A-E03 | LerCol |
| 0.364547782 | CG  | Col | CL | Region 1 | A-F03 | LerCol |
| 0.109759168 | CHG | Col | CL | Region 1 | A-F03 | LerCol |
| 0.023551831 | CHH | Col | CL | Region 1 | A-F03 | LerCol |
| 0.017521902 | CG  | Ler | CL | Region 1 | A-F03 | LerCol |
| 0.008968979 | CHG | Ler | CL | Region 1 | A-F03 | LerCol |
| 0.008533789 | CHH | Ler | CL | Region 1 | A-F03 | LerCol |
| 0.899785114 | CG  | Col | CL | Region 2 | A-F03 | LerCol |
| 0.52912067  | CHG | Col | CL | Region 2 | A-F03 | LerCol |
| 0.082684372 | CHH | Col | CL | Region 2 | A-F03 | LerCol |
| 0.774727196 | CG  | Ler | CL | Region 2 | A-F03 | LerCol |

|             |     |     |    |          |       |        |
|-------------|-----|-----|----|----------|-------|--------|
| 0.392583494 | CHG | Ler | CL | Region 2 | A-F03 | LerCol |
| 0.045691336 | CHH | Ler | CL | Region 2 | A-F03 | LerCol |
| 0.384816754 | CG  | Col | CL | Region 1 | A-G03 | LerCol |
| 0.100673653 | CHG | Col | CL | Region 1 | A-G03 | LerCol |
| 0.019943137 | CHH | Col | CL | Region 1 | A-G03 | LerCol |
| 0.018204804 | CG  | Ler | CL | Region 1 | A-G03 | LerCol |
| 0.009370016 | CHG | Ler | CL | Region 1 | A-G03 | LerCol |
| 0.007613599 | CHH | Ler | CL | Region 1 | A-G03 | LerCol |
| 0.897678809 | CG  | Col | CL | Region 2 | A-G03 | LerCol |
| 0.533345033 | CHG | Col | CL | Region 2 | A-G03 | LerCol |
| 0.086604064 | CHH | Col | CL | Region 2 | A-G03 | LerCol |
| 0.707415123 | CG  | Ler | CL | Region 2 | A-G03 | LerCol |
| 0.356863464 | CHG | Ler | CL | Region 2 | A-G03 | LerCol |
| 0.03672153  | CHH | Ler | CL | Region 2 | A-G03 | LerCol |
| 0.375626881 | CG  | Col | CL | Region 1 | A-H03 | LerCol |
| 0.091733474 | CHG | Col | CL | Region 1 | A-H03 | LerCol |
| 0.01821454  | CHH | Col | CL | Region 1 | A-H03 | LerCol |
| 0.038659015 | CG  | Ler | CL | Region 1 | A-H03 | LerCol |
| 0.013230036 | CHG | Ler | CL | Region 1 | A-H03 | LerCol |
| 0.008593647 | CHH | Ler | CL | Region 1 | A-H03 | LerCol |
| 0.905178857 | CG  | Col | CL | Region 2 | A-H03 | LerCol |
| 0.523196951 | CHG | Col | CL | Region 2 | A-H03 | LerCol |
| 0.080011688 | CHH | Col | CL | Region 2 | A-H03 | LerCol |
| 0.864686218 | CG  | Ler | CL | Region 2 | A-H03 | LerCol |
| 0.459951764 | CHG | Ler | CL | Region 2 | A-H03 | LerCol |
| 0.063594289 | CHH | Ler | CL | Region 2 | A-H03 | LerCol |
| 0.468357674 | CG  | Col | CL | Region 1 | A-A04 | LerCol |
| 0.131387598 | CHG | Col | CL | Region 1 | A-A04 | LerCol |
| 0.024437471 | CHH | Col | CL | Region 1 | A-A04 | LerCol |
| 0.032061473 | CG  | Ler | CL | Region 1 | A-A04 | LerCol |
| 0.015569488 | CHG | Ler | CL | Region 1 | A-A04 | LerCol |
| 0.010127809 | CHH | Ler | CL | Region 1 | A-A04 | LerCol |
| 0.90639713  | CG  | Col | CL | Region 2 | A-A04 | LerCol |
| 0.50526447  | CHG | Col | CL | Region 2 | A-A04 | LerCol |
| 0.070914988 | CHH | Col | CL | Region 2 | A-A04 | LerCol |
| 0.729314735 | CG  | Ler | CL | Region 2 | A-A04 | LerCol |

|             |     |     |    |          |       |        |
|-------------|-----|-----|----|----------|-------|--------|
| 0.35468948  | CHG | Ler | CL | Region 2 | A-A04 | LerCol |
| 0.032689313 | CHH | Ler | CL | Region 2 | A-A04 | LerCol |
| 0.53117207  | CG  | Col | CL | Region 1 | A-B04 | LerCol |
| 0.139715741 | CHG | Col | CL | Region 1 | A-B04 | LerCol |
| 0.028114664 | CHH | Col | CL | Region 1 | A-B04 | LerCol |
| 0.052570635 | CG  | Ler | CL | Region 1 | A-B04 | LerCol |
| 0.020341446 | CHG | Ler | CL | Region 1 | A-B04 | LerCol |
| 0.01154016  | CHH | Ler | CL | Region 1 | A-B04 | LerCol |
| 0.916859609 | CG  | Col | CL | Region 2 | A-B04 | LerCol |
| 0.506498068 | CHG | Col | CL | Region 2 | A-B04 | LerCol |
| 0.065119896 | CHH | Col | CL | Region 2 | A-B04 | LerCol |
| 0.735750908 | CG  | Ler | CL | Region 2 | A-B04 | LerCol |
| 0.348584964 | CHG | Ler | CL | Region 2 | A-B04 | LerCol |
| 0.02926064  | CHH | Ler | CL | Region 2 | A-B04 | LerCol |
| 0.512702893 | CG  | Col | CL | Region 1 | A-C04 | LerCol |
| 0.184484916 | CHG | Col | CL | Region 1 | A-C04 | LerCol |
| 0.037561275 | CHH | Col | CL | Region 1 | A-C04 | LerCol |
| 0.178536585 | CG  | Ler | CL | Region 1 | A-C04 | LerCol |
| 0.085323575 | CHG | Ler | CL | Region 1 | A-C04 | LerCol |
| 0.021409722 | CHH | Ler | CL | Region 1 | A-C04 | LerCol |
| 0.884967788 | CG  | Col | CL | Region 2 | A-C04 | LerCol |
| 0.507496701 | CHG | Col | CL | Region 2 | A-C04 | LerCol |
| 0.06552371  | CHH | Col | CL | Region 2 | A-C04 | LerCol |
| 0.74849862  | CG  | Ler | CL | Region 2 | A-C04 | LerCol |
| 0.381897255 | CHG | Ler | CL | Region 2 | A-C04 | LerCol |
| 0.033450921 | CHH | Ler | CL | Region 2 | A-C04 | LerCol |
| 0.409368635 | CG  | Col | CL | Region 1 | A-D04 | LerCol |
| 0.109229382 | CHG | Col | CL | Region 1 | A-D04 | LerCol |
| 0.021930891 | CHH | Col | CL | Region 1 | A-D04 | LerCol |
| 0.015355086 | CG  | Ler | CL | Region 1 | A-D04 | LerCol |
| 0.009024495 | CHG | Ler | CL | Region 1 | A-D04 | LerCol |
| 0.008327995 | CHH | Ler | CL | Region 1 | A-D04 | LerCol |
| 0.883893859 | CG  | Col | CL | Region 2 | A-D04 | LerCol |
| 0.51441004  | CHG | Col | CL | Region 2 | A-D04 | LerCol |
| 0.074126242 | CHH | Col | CL | Region 2 | A-D04 | LerCol |
| 0.836380781 | CG  | Ler | CL | Region 2 | A-D04 | LerCol |

|             |     |     |    |          |       |        |
|-------------|-----|-----|----|----------|-------|--------|
| 0.450277188 | CHG | Ler | CL | Region 2 | A-D04 | LerCol |
| 0.059064633 | CHH | Ler | CL | Region 2 | A-D04 | LerCol |
| 0.485541358 | CG  | Col | CL | Region 1 | A-E04 | LerCol |
| 0.168560106 | CHG | Col | CL | Region 1 | A-E04 | LerCol |
| 0.032985605 | CHH | Col | CL | Region 1 | A-E04 | LerCol |
| 0.028248588 | CG  | Ler | CL | Region 1 | A-E04 | LerCol |
| 0.010074627 | CHG | Ler | CL | Region 1 | A-E04 | LerCol |
| 0.011139533 | CHH | Ler | CL | Region 1 | A-E04 | LerCol |
| 0.910680576 | CG  | Col | CL | Region 2 | A-E04 | LerCol |
| 0.507251209 | CHG | Col | CL | Region 2 | A-E04 | LerCol |
| 0.072321914 | CHH | Col | CL | Region 2 | A-E04 | LerCol |
| 0.864116956 | CG  | Ler | CL | Region 2 | A-E04 | LerCol |
| 0.439231944 | CHG | Ler | CL | Region 2 | A-E04 | LerCol |
| 0.050673662 | CHH | Ler | CL | Region 2 | A-E04 | LerCol |
| 0.401160292 | CG  | Col | CL | Region 1 | A-F04 | LerCol |
| 0.124524152 | CHG | Col | CL | Region 1 | A-F04 | LerCol |
| 0.025855471 | CHH | Col | CL | Region 1 | A-F04 | LerCol |
| 0.056716418 | CG  | Ler | CL | Region 1 | A-F04 | LerCol |
| 0.023126735 | CHG | Ler | CL | Region 1 | A-F04 | LerCol |
| 0.011135485 | CHH | Ler | CL | Region 1 | A-F04 | LerCol |
| 0.884065714 | CG  | Col | CL | Region 2 | A-F04 | LerCol |
| 0.505797748 | CHG | Col | CL | Region 2 | A-F04 | LerCol |
| 0.074844075 | CHH | Col | CL | Region 2 | A-F04 | LerCol |
| 0.721419846 | CG  | Ler | CL | Region 2 | A-F04 | LerCol |
| 0.35608823  | CHG | Ler | CL | Region 2 | A-F04 | LerCol |
| 0.03914676  | CHH | Ler | CL | Region 2 | A-F04 | LerCol |
| 0.531226673 | CG  | Col | CL | Region 1 | A-G04 | LerCol |
| 0.234258166 | CHG | Col | CL | Region 1 | A-G04 | LerCol |
| 0.044655027 | CHH | Col | CL | Region 1 | A-G04 | LerCol |
| 0.049569605 | CG  | Ler | CL | Region 1 | A-G04 | LerCol |
| 0.030433769 | CHG | Ler | CL | Region 1 | A-G04 | LerCol |
| 0.014918054 | CHH | Ler | CL | Region 1 | A-G04 | LerCol |
| 0.871965156 | CG  | Col | CL | Region 2 | A-G04 | LerCol |
| 0.520627835 | CHG | Col | CL | Region 2 | A-G04 | LerCol |
| 0.087497212 | CHH | Col | CL | Region 2 | A-G04 | LerCol |
| 0.696303607 | CG  | Ler | CL | Region 2 | A-G04 | LerCol |

|             |     |     |    |          |       |        |
|-------------|-----|-----|----|----------|-------|--------|
| 0.355266113 | CHG | Ler | CL | Region 2 | A-G04 | LerCol |
| 0.037134953 | CHH | Ler | CL | Region 2 | A-G04 | LerCol |
| 0.446660885 | CG  | Col | CL | Region 1 | A-H04 | LerCol |
| 0.090512821 | CHG | Col | CL | Region 1 | A-H04 | LerCol |
| 0.018395311 | CHH | Col | CL | Region 1 | A-H04 | LerCol |
| 0.057173679 | CG  | Ler | CL | Region 1 | A-H04 | LerCol |
| 0.02230704  | CHG | Ler | CL | Region 1 | A-H04 | LerCol |
| 0.010190485 | CHH | Ler | CL | Region 1 | A-H04 | LerCol |
| 0.912087467 | CG  | Col | CL | Region 2 | A-H04 | LerCol |
| 0.521195321 | CHG | Col | CL | Region 2 | A-H04 | LerCol |
| 0.061380352 | CHH | Col | CL | Region 2 | A-H04 | LerCol |
| 0.816076645 | CG  | Ler | CL | Region 2 | A-H04 | LerCol |
| 0.391148924 | CHG | Ler | CL | Region 2 | A-H04 | LerCol |
| 0.032443046 | CHH | Ler | CL | Region 2 | A-H04 | LerCol |
| 0.421558601 | CG  | Col | CL | Region 1 | A-A05 | LerCol |
| 0.135582329 | CHG | Col | CL | Region 1 | A-A05 | LerCol |
| 0.030752897 | CHH | Col | CL | Region 1 | A-A05 | LerCol |
| 0.050422139 | CG  | Ler | CL | Region 1 | A-A05 | LerCol |
| 0.027004608 | CHG | Ler | CL | Region 1 | A-A05 | LerCol |
| 0.011764945 | CHH | Ler | CL | Region 1 | A-A05 | LerCol |
| 0.875775265 | CG  | Col | CL | Region 2 | A-A05 | LerCol |
| 0.528728637 | CHG | Col | CL | Region 2 | A-A05 | LerCol |
| 0.081152098 | CHH | Col | CL | Region 2 | A-A05 | LerCol |
| 0.719960061 | CG  | Ler | CL | Region 2 | A-A05 | LerCol |
| 0.360915128 | CHG | Ler | CL | Region 2 | A-A05 | LerCol |
| 0.03570956  | CHH | Ler | CL | Region 2 | A-A05 | LerCol |
| 0.497882772 | CG  | Col | CL | Region 1 | A-B05 | LerCol |
| 0.119575699 | CHG | Col | CL | Region 1 | A-B05 | LerCol |
| 0.025333333 | CHH | Col | CL | Region 1 | A-B05 | LerCol |
| 0.057875624 | CG  | Ler | CL | Region 1 | A-B05 | LerCol |
| 0.02162452  | CHG | Ler | CL | Region 1 | A-B05 | LerCol |
| 0.009953983 | CHH | Ler | CL | Region 1 | A-B05 | LerCol |
| 0.918325556 | CG  | Col | CL | Region 2 | A-B05 | LerCol |
| 0.521629779 | CHG | Col | CL | Region 2 | A-B05 | LerCol |
| 0.068749809 | CHH | Col | CL | Region 2 | A-B05 | LerCol |
| 0.867185081 | CG  | Ler | CL | Region 2 | A-B05 | LerCol |

|             |     |     |    |          |       |        |
|-------------|-----|-----|----|----------|-------|--------|
| 0.463655125 | CHG | Ler | CL | Region 2 | A-B05 | LerCol |
| 0.058616843 | CHH | Ler | CL | Region 2 | A-B05 | LerCol |
| 0.426808142 | CG  | Col | CL | Region 1 | A-C05 | LerCol |
| 0.096296296 | CHG | Col | CL | Region 1 | A-C05 | LerCol |
| 0.019771306 | CHH | Col | CL | Region 1 | A-C05 | LerCol |
| 0.037604457 | CG  | Ler | CL | Region 1 | A-C05 | LerCol |
| 0.017366454 | CHG | Ler | CL | Region 1 | A-C05 | LerCol |
| 0.009022374 | CHH | Ler | CL | Region 1 | A-C05 | LerCol |
| 0.918742957 | CG  | Col | CL | Region 2 | A-C05 | LerCol |
| 0.496728948 | CHG | Col | CL | Region 2 | A-C05 | LerCol |
| 0.061386327 | CHH | Col | CL | Region 2 | A-C05 | LerCol |
| 0.823863438 | CG  | Ler | CL | Region 2 | A-C05 | LerCol |
| 0.390922827 | CHG | Ler | CL | Region 2 | A-C05 | LerCol |
| 0.034143145 | CHH | Ler | CL | Region 2 | A-C05 | LerCol |
| 0.472548676 | CG  | Col | CL | Region 1 | A-D05 | LerCol |
| 0.155789328 | CHG | Col | CL | Region 1 | A-D05 | LerCol |
| 0.028356252 | CHH | Col | CL | Region 1 | A-D05 | LerCol |
| 0.028042843 | CG  | Ler | CL | Region 1 | A-D05 | LerCol |
| 0.013678741 | CHG | Ler | CL | Region 1 | A-D05 | LerCol |
| 0.010635604 | CHH | Ler | CL | Region 1 | A-D05 | LerCol |
| 0.913072612 | CG  | Col | CL | Region 2 | A-D05 | LerCol |
| 0.531515491 | CHG | Col | CL | Region 2 | A-D05 | LerCol |
| 0.076273225 | CHH | Col | CL | Region 2 | A-D05 | LerCol |
| 0.748679829 | CG  | Ler | CL | Region 2 | A-D05 | LerCol |
| 0.36623668  | CHG | Ler | CL | Region 2 | A-D05 | LerCol |
| 0.041266275 | CHH | Ler | CL | Region 2 | A-D05 | LerCol |
| 0.376085241 | CG  | Col | CL | Region 1 | A-E05 | LerCol |
| 0.098718447 | CHG | Col | CL | Region 1 | A-E05 | LerCol |
| 0.021961053 | CHH | Col | CL | Region 1 | A-E05 | LerCol |
| 0.036199095 | CG  | Ler | CL | Region 1 | A-E05 | LerCol |
| 0.016451479 | CHG | Ler | CL | Region 1 | A-E05 | LerCol |
| 0.009216908 | CHH | Ler | CL | Region 1 | A-E05 | LerCol |
| 0.893233903 | CG  | Col | CL | Region 2 | A-E05 | LerCol |
| 0.525235348 | CHG | Col | CL | Region 2 | A-E05 | LerCol |
| 0.07847858  | CHH | Col | CL | Region 2 | A-E05 | LerCol |
| 0.801399756 | CG  | Ler | CL | Region 2 | A-E05 | LerCol |



|             |     |     |    |          |       |           |
|-------------|-----|-----|----|----------|-------|-----------|
| 0.396126067 | CHG | Ler | CL | Region 2 | A-E05 | LerCol    |
| 0.040668397 | CHH | Ler | CL | Region 2 | A-E05 | LerCol    |
| 0.515893471 | CG  | Col | CL | Region 1 | A-F05 | ColLer2F2 |
| 0.170042313 | CHG | Col | CL | Region 1 | A-F05 | ColLer2F2 |
| 0.072949801 | CHH | Col | CL | Region 1 | A-F05 | ColLer2F2 |
| 0.564642617 | CG  | Ler | CL | Region 1 | A-F05 | ColLer2F2 |
| 0.287929515 | CHG | Ler | CL | Region 1 | A-F05 | ColLer2F2 |
| 0.095228852 | CHH | Ler | CL | Region 1 | A-F05 | ColLer2F2 |
| 0.909078074 | CG  | Ler | LL | Region 2 | A-F05 | ColLer2F2 |
| 0.453756243 | CHG | Ler | LL | Region 2 | A-F05 | ColLer2F2 |
| 0.070271711 | CHH | Ler | LL | Region 2 | A-F05 | ColLer2F2 |
| 0.151780362 | CG  | Ler | LL | Region 1 | A-G05 | ColLer2F2 |
| 0.097218943 | CHG | Ler | LL | Region 1 | A-G05 | ColLer2F2 |
| 0.084896327 | CHH | Ler | LL | Region 1 | A-G05 | ColLer2F2 |
| 0.909069136 | CG  | Ler | LL | Region 2 | A-G05 | ColLer2F2 |
| 0.44010382  | CHG | Ler | LL | Region 2 | A-G05 | ColLer2F2 |
| 0.05783477  | CHH | Ler | LL | Region 2 | A-G05 | ColLer2F2 |
| 0.186815774 | CG  | Ler | LL | Region 1 | A-H05 | ColLer2F2 |
| 0.127552915 | CHG | Ler | LL | Region 1 | A-H05 | ColLer2F2 |
| 0.143371301 | CHH | Ler | LL | Region 1 | A-H05 | ColLer2F2 |
| 0.92442388  | CG  | Col | CC | Region 2 | A-H05 | ColLer2F2 |
| 0.507556713 | CHG | Col | CC | Region 2 | A-H05 | ColLer2F2 |
| 0.059741175 | CHH | Col | CC | Region 2 | A-H05 | ColLer2F2 |
| 0.861605973 | CG  | Col | CC | Region 1 | A-A06 | ColLer2F2 |
| 0.549253422 | CHG | Col | CC | Region 1 | A-A06 | ColLer2F2 |
| 0.382394099 | CHH | Col | CC | Region 1 | A-A06 | ColLer2F2 |
| 0.905263918 | CG  | Ler | LL | Region 2 | A-A06 | ColLer2F2 |
| 0.488966598 | CHG | Ler | LL | Region 2 | A-A06 | ColLer2F2 |
| 0.079691869 | CHH | Ler | LL | Region 2 | A-A06 | ColLer2F2 |
| 0.012446411 | CG  | Ler | LL | Region 1 | A-B06 | ColLer2F2 |
| 0.008628693 | CHG | Ler | LL | Region 1 | A-B06 | ColLer2F2 |
| 0.00798591  | CHH | Ler | LL | Region 1 | A-B06 | ColLer2F2 |
| 0.918408778 | CG  | Ler | LL | Region 2 | A-B06 | ColLer2F2 |
| 0.479120571 | CHG | Ler | LL | Region 2 | A-B06 | ColLer2F2 |
| 0.058244212 | CHH | Ler | LL | Region 2 | A-B06 | ColLer2F2 |
| 0.686705989 | CG  | Col | CL | Region 1 | A-C06 | ColLer2F2 |

|             |     |     |    |          |       |           |
|-------------|-----|-----|----|----------|-------|-----------|
| 0.25224336  | CHG | Col | CL | Region 1 | A-C06 | ColLer2F2 |
| 0.064871481 | CHH | Col | CL | Region 1 | A-C06 | ColLer2F2 |
| 0.623166604 | CG  | Ler | CL | Region 1 | A-C06 | ColLer2F2 |
| 0.294555192 | CHG | Ler | CL | Region 1 | A-C06 | ColLer2F2 |
| 0.068590164 | CHH | Ler | CL | Region 1 | A-C06 | ColLer2F2 |
| 0.923616217 | CG  | Ler | LL | Region 2 | A-C06 | ColLer2F2 |
| 0.453784872 | CHG | Ler | LL | Region 2 | A-C06 | ColLer2F2 |
| 0.050647711 | CHH | Ler | LL | Region 2 | A-C06 | ColLer2F2 |
| 0.145538201 | CG  | Ler | LL | Region 1 | A-D06 | ColLer2F2 |
| 0.085480709 | CHG | Ler | LL | Region 1 | A-D06 | ColLer2F2 |
| 0.075675505 | CHH | Ler | LL | Region 1 | A-D06 | ColLer2F2 |
| 0.938708157 | CG  | Col | CC | Region 2 | A-D06 | ColLer2F2 |
| 0.528989943 | CHG | Col | CC | Region 2 | A-D06 | ColLer2F2 |
| 0.063566573 | CHH | Col | CC | Region 2 | A-D06 | ColLer2F2 |
| 0.66629485  | CG  | Col | CL | Region 1 | A-E06 | ColLer2F2 |
| 0.287778756 | CHG | Col | CL | Region 1 | A-E06 | ColLer2F2 |
| 0.116654309 | CHH | Col | CL | Region 1 | A-E06 | ColLer2F2 |
| 0.535262206 | CG  | Ler | CL | Region 1 | A-E06 | ColLer2F2 |
| 0.309092769 | CHG | Ler | CL | Region 1 | A-E06 | ColLer2F2 |
| 0.139104424 | CHH | Ler | CL | Region 1 | A-E06 | ColLer2F2 |
| 0.90169313  | CG  | Ler | LL | Region 2 | A-E06 | ColLer2F2 |
| 0.437721939 | CHG | Ler | LL | Region 2 | A-E06 | ColLer2F2 |
| 0.059885364 | CHH | Ler | LL | Region 2 | A-E06 | ColLer2F2 |
| 0.504892368 | CG  | Col | CL | Region 1 | A-F06 | ColLer2F2 |
| 0.101916712 | CHG | Col | CL | Region 1 | A-F06 | ColLer2F2 |
| 0.023269244 | CHH | Col | CL | Region 1 | A-F06 | ColLer2F2 |
| 0.024505184 | CG  | Ler | CL | Region 1 | A-F06 | ColLer2F2 |
| 0.009981516 | CHG | Ler | CL | Region 1 | A-F06 | ColLer2F2 |
| 0.00922901  | CHH | Ler | CL | Region 1 | A-F06 | ColLer2F2 |
| 0.916204825 | CG  | Col | CL | Region 2 | A-F06 | ColLer2F2 |
| 0.512157297 | CHG | Col | CL | Region 2 | A-F06 | ColLer2F2 |
| 0.067821882 | CHH | Col | CL | Region 2 | A-F06 | ColLer2F2 |
| 0.9209469   | CG  | Ler | CL | Region 2 | A-F06 | ColLer2F2 |
| 0.489125181 | CHG | Ler | CL | Region 2 | A-F06 | ColLer2F2 |
| 0.063877499 | CHH | Ler | CL | Region 2 | A-F06 | ColLer2F2 |
| 0.592972402 | CG  | Col | CL | Region 1 | A-G06 | ColLer2F2 |

|             |     |     |    |          |       |           |
|-------------|-----|-----|----|----------|-------|-----------|
| 0.175783797 | CHG | Col | CL | Region 1 | A-G06 | ColLer2F2 |
| 0.062096795 | CHH | Col | CL | Region 1 | A-G06 | ColLer2F2 |
| 0.59654321  | CG  | Ler | CL | Region 1 | A-G06 | ColLer2F2 |
| 0.284305108 | CHG | Ler | CL | Region 1 | A-G06 | ColLer2F2 |
| 0.084540647 | CHH | Ler | CL | Region 1 | A-G06 | ColLer2F2 |
| 0.91851304  | CG  | Col | CL | Region 2 | A-G06 | ColLer2F2 |
| 0.446526361 | CHG | Col | CL | Region 2 | A-G06 | ColLer2F2 |
| 0.054646303 | CHH | Col | CL | Region 2 | A-G06 | ColLer2F2 |
| 0.908166624 | CG  | Ler | CL | Region 2 | A-G06 | ColLer2F2 |
| 0.403925872 | CHG | Ler | CL | Region 2 | A-G06 | ColLer2F2 |
| 0.048557682 | CHH | Ler | CL | Region 2 | A-G06 | ColLer2F2 |
| 0.032248721 | CG  | Ler | LL | Region 1 | A-H06 | ColLer2F2 |
| 0.010943081 | CHG | Ler | LL | Region 1 | A-H06 | ColLer2F2 |
| 0.008827556 | CHH | Ler | LL | Region 1 | A-H06 | ColLer2F2 |
| 0.91215401  | CG  | Ler | LL | Region 2 | A-H06 | ColLer2F2 |
| 0.444267516 | CHG | Ler | LL | Region 2 | A-H06 | ColLer2F2 |
| 0.055891784 | CHH | Ler | LL | Region 2 | A-H06 | ColLer2F2 |
| 0.595028409 | CG  | Col | CL | Region 1 | A-A07 | ColLer2F2 |
| 0.229831039 | CHG | Col | CL | Region 1 | A-A07 | ColLer2F2 |
| 0.097721152 | CHH | Col | CL | Region 1 | A-A07 | ColLer2F2 |
| 0.641374838 | CG  | Ler | CL | Region 1 | A-A07 | ColLer2F2 |
| 0.369897959 | CHG | Ler | CL | Region 1 | A-A07 | ColLer2F2 |
| 0.135299284 | CHH | Ler | CL | Region 1 | A-A07 | ColLer2F2 |
| 0.932950406 | CG  | Col | CL | Region 2 | A-A07 | ColLer2F2 |
| 0.524450678 | CHG | Col | CL | Region 2 | A-A07 | ColLer2F2 |
| 0.076960343 | CHH | Col | CL | Region 2 | A-A07 | ColLer2F2 |
| 0.855321615 | CG  | Ler | CL | Region 2 | A-A07 | ColLer2F2 |
| 0.423773443 | CHG | Ler | CL | Region 2 | A-A07 | ColLer2F2 |
| 0.054102073 | CHH | Ler | CL | Region 2 | A-A07 | ColLer2F2 |
| 0.670803662 | CG  | Col | CL | Region 1 | A-B07 | ColLer2F2 |
| 0.294561206 | CHG | Col | CL | Region 1 | A-B07 | ColLer2F2 |
| 0.12997109  | CHH | Col | CL | Region 1 | A-B07 | ColLer2F2 |
| 0.210581566 | CG  | Ler | CL | Region 1 | A-B07 | ColLer2F2 |
| 0.133338831 | CHG | Ler | CL | Region 1 | A-B07 | ColLer2F2 |
| 0.105654762 | CHH | Ler | CL | Region 1 | A-B07 | ColLer2F2 |
| 0.903688965 | CG  | Col | CL | Region 2 | A-B07 | ColLer2F2 |

|             |     |     |    |          |       |           |
|-------------|-----|-----|----|----------|-------|-----------|
| 0.517309506 | CHG | Col | CL | Region 2 | A-B07 | ColLer2F2 |
| 0.079895813 | CHH | Col | CL | Region 2 | A-B07 | ColLer2F2 |
| 0.89179024  | CG  | Ler | CL | Region 2 | A-B07 | ColLer2F2 |
| 0.493179595 | CHG | Ler | CL | Region 2 | A-B07 | ColLer2F2 |
| 0.075285619 | CHH | Ler | CL | Region 2 | A-B07 | ColLer2F2 |
| 0.613735996 | CG  | Col | CL | Region 1 | A-C07 | ColLer2F2 |
| 0.179509214 | CHG | Col | CL | Region 1 | A-C07 | ColLer2F2 |
| 0.027865991 | CHH | Col | CL | Region 1 | A-C07 | ColLer2F2 |
| 0.116952156 | CG  | Ler | CL | Region 1 | A-C07 | ColLer2F2 |
| 0.04128387  | CHG | Ler | CL | Region 1 | A-C07 | ColLer2F2 |
| 0.012257799 | CHH | Ler | CL | Region 1 | A-C07 | ColLer2F2 |
| 0.912272359 | CG  | Col | CC | Region 2 | A-C07 | ColLer2F2 |
| 0.513173261 | CHG | Col | CC | Region 2 | A-C07 | ColLer2F2 |
| 0.056435736 | CHH | Col | CC | Region 2 | A-C07 | ColLer2F2 |
| 0.68627451  | CG  | Col | CL | Region 1 | A-D07 | ColLer2F2 |
| 0.313147231 | CHG | Col | CL | Region 1 | A-D07 | ColLer2F2 |
| 0.096351592 | CHH | Col | CL | Region 1 | A-D07 | ColLer2F2 |
| 0.297491039 | CG  | Ler | CL | Region 1 | A-D07 | ColLer2F2 |
| 0.157399261 | CHG | Ler | CL | Region 1 | A-D07 | ColLer2F2 |
| 0.067844605 | CHH | Ler | CL | Region 1 | A-D07 | ColLer2F2 |
| 0.922607102 | CG  | Ler | LL | Region 2 | A-D07 | ColLer2F2 |
| 0.498195051 | CHG | Ler | LL | Region 2 | A-D07 | ColLer2F2 |
| 0.075275362 | CHH | Ler | LL | Region 2 | A-D07 | ColLer2F2 |
| 0.488391906 | CG  | Col | CL | Region 1 | A-E07 | ColLer2F2 |
| 0.100435219 | CHG | Col | CL | Region 1 | A-E07 | ColLer2F2 |
| 0.020972953 | CHH | Col | CL | Region 1 | A-E07 | ColLer2F2 |
| 0.079       | CG  | Ler | CL | Region 1 | A-E07 | ColLer2F2 |
| 0.016445101 | CHG | Ler | CL | Region 1 | A-E07 | ColLer2F2 |
| 0.010368213 | CHH | Ler | CL | Region 1 | A-E07 | ColLer2F2 |
| 0.929453914 | CG  | Ler | LL | Region 2 | A-E07 | ColLer2F2 |
| 0.454885013 | CHG | Ler | LL | Region 2 | A-E07 | ColLer2F2 |
| 0.054097735 | CHH | Ler | LL | Region 2 | A-E07 | ColLer2F2 |
| 0.858992467 | CG  | Col | CL | Region 1 | A-F07 | ColLer2F2 |
| 0.56459308  | CHG | Col | CL | Region 1 | A-F07 | ColLer2F2 |
| 0.394643002 | CHH | Col | CL | Region 1 | A-F07 | ColLer2F2 |
| 0.771828415 | CG  | Ler | CL | Region 1 | A-F07 | ColLer2F2 |

|             |     |     |    |          |       |           |
|-------------|-----|-----|----|----------|-------|-----------|
| 0.557441721 | CHG | Ler | CL | Region 1 | A-F07 | ColLer2F2 |
| 0.432773879 | CHH | Ler | CL | Region 1 | A-F07 | ColLer2F2 |
| 0.906880577 | CG  | Ler | LL | Region 2 | A-F07 | ColLer2F2 |
| 0.474948133 | CHG | Ler | LL | Region 2 | A-F07 | ColLer2F2 |
| 0.083211865 | CHH | Ler | LL | Region 2 | A-F07 | ColLer2F2 |
| 0.723659952 | CG  | Ler | LL | Region 1 | A-G07 | ColLer2F2 |
| 0.521591031 | CHG | Ler | LL | Region 1 | A-G07 | ColLer2F2 |
| 0.439989196 | CHH | Ler | LL | Region 1 | A-G07 | ColLer2F2 |
| 0.930111277 | CG  | Col | CL | Region 2 | A-G07 | ColLer2F2 |
| 0.547718072 | CHG | Col | CL | Region 2 | A-G07 | ColLer2F2 |
| 0.089276542 | CHH | Col | CL | Region 2 | A-G07 | ColLer2F2 |
| 0.921937639 | CG  | Ler | CL | Region 2 | A-G07 | ColLer2F2 |
| 0.505449591 | CHG | Ler | CL | Region 2 | A-G07 | ColLer2F2 |
| 0.072868618 | CHH | Ler | CL | Region 2 | A-G07 | ColLer2F2 |
| 0.708503919 | CG  | Ler | LL | Region 1 | A-H07 | ColLer2F2 |
| 0.468885606 | CHG | Ler | LL | Region 1 | A-H07 | ColLer2F2 |
| 0.219575701 | CHH | Ler | LL | Region 1 | A-H07 | ColLer2F2 |
| 0.923014121 | CG  | Col | CL | Region 2 | A-H07 | ColLer2F2 |
| 0.53636961  | CHG | Col | CL | Region 2 | A-H07 | ColLer2F2 |
| 0.073581845 | CHH | Col | CL | Region 2 | A-H07 | ColLer2F2 |
| 0.90929368  | CG  | Ler | CL | Region 2 | A-H07 | ColLer2F2 |
| 0.516450917 | CHG | Ler | CL | Region 2 | A-H07 | ColLer2F2 |
| 0.072757938 | CHH | Ler | CL | Region 2 | A-H07 | ColLer2F2 |
| 0.115822472 | CG  | Ler | LL | Region 1 | A-A08 | ColLer2F2 |
| 0.063001813 | CHG | Ler | LL | Region 1 | A-A08 | ColLer2F2 |
| 0.060941828 | CHH | Ler | LL | Region 1 | A-A08 | ColLer2F2 |
| 0.921371173 | CG  | Col | CC | Region 2 | A-A08 | ColLer2F2 |
| 0.528718079 | CHG | Col | CC | Region 2 | A-A08 | ColLer2F2 |
| 0.066545539 | CHH | Col | CC | Region 2 | A-A08 | ColLer2F2 |
| 0.877509173 | CG  | Col | CC | Region 1 | A-B08 | ColLer2F2 |
| 0.60634663  | CHG | Col | CC | Region 1 | A-B08 | ColLer2F2 |
| 0.393035429 | CHH | Col | CC | Region 1 | A-B08 | ColLer2F2 |
| 0.929745436 | CG  | Col | CL | Region 2 | A-B08 | ColLer2F2 |
| 0.556812414 | CHG | Col | CL | Region 2 | A-B08 | ColLer2F2 |
| 0.074664418 | CHH | Col | CL | Region 2 | A-B08 | ColLer2F2 |
| 0.923456088 | CG  | Ler | CL | Region 2 | A-B08 | ColLer2F2 |

|             |     |     |    |          |       |           |
|-------------|-----|-----|----|----------|-------|-----------|
| 0.531217852 | CHG | Ler | CL | Region 2 | A-B08 | ColLer2F2 |
| 0.074265901 | CHH | Ler | CL | Region 2 | A-B08 | ColLer2F2 |
| 0.678787879 | CG  | Col | CL | Region 1 | A-C08 | ColLer2F2 |
| 0.292954709 | CHG | Col | CL | Region 1 | A-C08 | ColLer2F2 |
| 0.144787696 | CHH | Col | CL | Region 1 | A-C08 | ColLer2F2 |
| 0.159612626 | CG  | Ler | CL | Region 1 | A-C08 | ColLer2F2 |
| 0.088309859 | CHG | Ler | CL | Region 1 | A-C08 | ColLer2F2 |
| 0.100201769 | CHH | Ler | CL | Region 1 | A-C08 | ColLer2F2 |
| 0.92268303  | CG  | Col | CL | Region 2 | A-C08 | ColLer2F2 |
| 0.512610385 | CHG | Col | CL | Region 2 | A-C08 | ColLer2F2 |
| 0.077516291 | CHH | Col | CL | Region 2 | A-C08 | ColLer2F2 |
| 0.918094724 | CG  | Ler | CL | Region 2 | A-C08 | ColLer2F2 |
| 0.508621339 | CHG | Ler | CL | Region 2 | A-C08 | ColLer2F2 |
| 0.071042587 | CHH | Ler | CL | Region 2 | A-C08 | ColLer2F2 |
| 0.766000815 | CG  | Ler | LL | Region 1 | A-D08 | ColLer2F2 |
| 0.520021471 | CHG | Ler | LL | Region 1 | A-D08 | ColLer2F2 |
| 0.355818907 | CHH | Ler | LL | Region 1 | A-D08 | ColLer2F2 |
| 0.933556031 | CG  | Col | CL | Region 2 | A-D08 | ColLer2F2 |
| 0.517418568 | CHG | Col | CL | Region 2 | A-D08 | ColLer2F2 |
| 0.079761697 | CHH | Col | CL | Region 2 | A-D08 | ColLer2F2 |
| 0.918942475 | CG  | Ler | CL | Region 2 | A-D08 | ColLer2F2 |
| 0.473388814 | CHG | Ler | CL | Region 2 | A-D08 | ColLer2F2 |
| 0.065681329 | CHH | Ler | CL | Region 2 | A-D08 | ColLer2F2 |
| 0.761671335 | CG  | Col | CL | Region 1 | A-E08 | ColLer2F2 |
| 0.40776699  | CHG | Col | CL | Region 1 | A-E08 | ColLer2F2 |
| 0.246385334 | CHH | Col | CL | Region 1 | A-E08 | ColLer2F2 |
| 0.723842739 | CG  | Ler | CL | Region 1 | A-E08 | ColLer2F2 |
| 0.449117537 | CHG | Ler | CL | Region 1 | A-E08 | ColLer2F2 |
| 0.29842401  | CHH | Ler | CL | Region 1 | A-E08 | ColLer2F2 |
| 0.913427706 | CG  | Ler | LL | Region 2 | A-E08 | ColLer2F2 |
| 0.434458292 | CHG | Ler | LL | Region 2 | A-E08 | ColLer2F2 |
| 0.067428855 | CHH | Ler | LL | Region 2 | A-E08 | ColLer2F2 |
| 0.902453444 | CG  | Col | CC | Region 1 | A-F08 | ColLer2F2 |
| 0.593893427 | CHG | Col | CC | Region 1 | A-F08 | ColLer2F2 |
| 0.439369744 | CHH | Col | CC | Region 1 | A-F08 | ColLer2F2 |
| 0.917433257 | CG  | Ler | LL | Region 2 | A-F08 | ColLer2F2 |

|             |     |     |    |          |       |           |
|-------------|-----|-----|----|----------|-------|-----------|
| 0.485519511 | CHG | Ler | LL | Region 2 | A-F08 | ColLer2F2 |
| 0.070578079 | CHH | Ler | LL | Region 2 | A-F08 | ColLer2F2 |
| 0.006455399 | CG  | Ler | LL | Region 1 | A-G08 | ColLer2F2 |
| 0.006859185 | CHG | Ler | LL | Region 1 | A-G08 | ColLer2F2 |
| 0.007233457 | CHH | Ler | LL | Region 1 | A-G08 | ColLer2F2 |
| 0.929874894 | CG  | Col | CL | Region 2 | A-G08 | ColLer2F2 |
| 0.506094205 | CHG | Col | CL | Region 2 | A-G08 | ColLer2F2 |
| 0.06606225  | CHH | Col | CL | Region 2 | A-G08 | ColLer2F2 |
| 0.935624601 | CG  | Ler | CL | Region 2 | A-G08 | ColLer2F2 |
| 0.486479298 | CHG | Ler | CL | Region 2 | A-G08 | ColLer2F2 |
| 0.062806927 | CHH | Ler | CL | Region 2 | A-G08 | ColLer2F2 |
| 0.295546079 | CG  | Ler | LL | Region 1 | A-H08 | ColLer2F2 |
| 0.204343765 | CHG | Ler | LL | Region 1 | A-H08 | ColLer2F2 |
| 0.281036583 | CHH | Ler | LL | Region 1 | A-H08 | ColLer2F2 |
| 0.924060232 | CG  | Col | CL | Region 2 | A-H08 | ColLer2F2 |
| 0.526963446 | CHG | Col | CL | Region 2 | A-H08 | ColLer2F2 |
| 0.075455903 | CHH | Col | CL | Region 2 | A-H08 | ColLer2F2 |
| 0.931654251 | CG  | Ler | CL | Region 2 | A-H08 | ColLer2F2 |
| 0.520893016 | CHG | Ler | CL | Region 2 | A-H08 | ColLer2F2 |
| 0.072748496 | CHH | Ler | CL | Region 2 | A-H08 | ColLer2F2 |
| 0.589407115 | CG  | Col | CL | Region 1 | A-A09 | ColLer2F2 |
| 0.246250545 | CHG | Col | CL | Region 1 | A-A09 | ColLer2F2 |
| 0.118093856 | CHH | Col | CL | Region 1 | A-A09 | ColLer2F2 |
| 0.590094574 | CG  | Ler | CL | Region 1 | A-A09 | ColLer2F2 |
| 0.356091819 | CHG | Ler | CL | Region 1 | A-A09 | ColLer2F2 |
| 0.153344244 | CHH | Ler | CL | Region 1 | A-A09 | ColLer2F2 |
| 0.878234086 | CG  | Ler | LL | Region 2 | A-A09 | ColLer2F2 |
| 0.471439111 | CHG | Ler | LL | Region 2 | A-A09 | ColLer2F2 |
| 0.071424809 | CHH | Ler | LL | Region 2 | A-A09 | ColLer2F2 |
| 0.588471742 | CG  | Col | CC | Region 1 | A-B09 | ColLer2F2 |
| 0.207201777 | CHG | Col | CC | Region 1 | A-B09 | ColLer2F2 |
| 0.045021264 | CHH | Col | CC | Region 1 | A-B09 | ColLer2F2 |
| 0.927376525 | CG  | Ler | LL | Region 2 | A-B09 | ColLer2F2 |
| 0.511763955 | CHG | Ler | LL | Region 2 | A-B09 | ColLer2F2 |
| 0.07845234  | CHH | Ler | LL | Region 2 | A-B09 | ColLer2F2 |
| 0.399228544 | CG  | Col | CL | Region 1 | A-C09 | ColLer2F2 |

|             |     |     |    |          |       |           |
|-------------|-----|-----|----|----------|-------|-----------|
| 0.092938209 | CHG | Col | CL | Region 1 | A-C09 | ColLer2F2 |
| 0.036365406 | CHH | Col | CL | Region 1 | A-C09 | ColLer2F2 |
| 0.064413265 | CG  | Ler | CL | Region 1 | A-C09 | ColLer2F2 |
| 0.028230185 | CHG | Ler | CL | Region 1 | A-C09 | ColLer2F2 |
| 0.022675277 | CHH | Ler | CL | Region 1 | A-C09 | ColLer2F2 |
| 0.908603048 | CG  | Col | CL | Region 2 | A-C09 | ColLer2F2 |
| 0.463851593 | CHG | Col | CL | Region 2 | A-C09 | ColLer2F2 |
| 0.080154798 | CHH | Col | CL | Region 2 | A-C09 | ColLer2F2 |
| 0.899872774 | CG  | Ler | CL | Region 2 | A-C09 | ColLer2F2 |
| 0.44500616  | CHG | Ler | CL | Region 2 | A-C09 | ColLer2F2 |
| 0.075456092 | CHH | Ler | CL | Region 2 | A-C09 | ColLer2F2 |
| 0.592808117 | CG  | Col | CL | Region 1 | A-D09 | ColLer4F2 |
| 0.226286386 | CHG | Col | CL | Region 1 | A-D09 | ColLer4F2 |
| 0.093372988 | CHH | Col | CL | Region 1 | A-D09 | ColLer4F2 |
| 0.320188346 | CG  | Ler | CL | Region 1 | A-D09 | ColLer4F2 |
| 0.166202198 | CHG | Ler | CL | Region 1 | A-D09 | ColLer4F2 |
| 0.080400211 | CHH | Ler | CL | Region 1 | A-D09 | ColLer4F2 |
| 0.919262452 | CG  | Col | CL | Region 2 | A-D09 | ColLer4F2 |
| 0.556903155 | CHG | Col | CL | Region 2 | A-D09 | ColLer4F2 |
| 0.078189164 | CHH | Col | CL | Region 2 | A-D09 | ColLer4F2 |
| 0.897390743 | CG  | Ler | CL | Region 2 | A-D09 | ColLer4F2 |
| 0.508100436 | CHG | Ler | CL | Region 2 | A-D09 | ColLer4F2 |
| 0.068351635 | CHH | Ler | CL | Region 2 | A-D09 | ColLer4F2 |
| 0.780180419 | CG  | Col | CL | Region 1 | A-E09 | ColLer4F2 |
| 0.364990298 | CHG | Col | CL | Region 1 | A-E09 | ColLer4F2 |
| 0.148194601 | CHH | Col | CL | Region 1 | A-E09 | ColLer4F2 |
| 0.42962455  | CG  | Ler | CL | Region 1 | A-E09 | ColLer4F2 |
| 0.305624958 | CHG | Ler | CL | Region 1 | A-E09 | ColLer4F2 |
| 0.162484037 | CHH | Ler | CL | Region 1 | A-E09 | ColLer4F2 |
| 0.892708276 | CG  | Col | CC | Region 2 | A-E09 | ColLer4F2 |
| 0.520143835 | CHG | Col | CC | Region 2 | A-E09 | ColLer4F2 |
| 0.06210213  | CHH | Col | CC | Region 2 | A-E09 | ColLer4F2 |
| 0.619157609 | CG  | Col | CL | Region 1 | A-F09 | ColLer4F2 |
| 0.21038266  | CHG | Col | CL | Region 1 | A-F09 | ColLer4F2 |
| 0.104499394 | CHH | Col | CL | Region 1 | A-F09 | ColLer4F2 |
| 0.248761319 | CG  | Ler | CL | Region 1 | A-F09 | ColLer4F2 |



|             |     |     |    |          |       |           |
|-------------|-----|-----|----|----------|-------|-----------|
| 0.114435203 | CHG | Ler | CL | Region 1 | A-F09 | ColLer4F2 |
| 0.082686003 | CHH | Ler | CL | Region 1 | A-F09 | ColLer4F2 |
| 0.929294824 | CG  | Col | CL | Region 2 | A-F09 | ColLer4F2 |
| 0.480352273 | CHG | Col | CL | Region 2 | A-F09 | ColLer4F2 |
| 0.06609572  | CHH | Col | CL | Region 2 | A-F09 | ColLer4F2 |
| 0.900430663 | CG  | Ler | CL | Region 2 | A-F09 | ColLer4F2 |
| 0.434150077 | CHG | Ler | CL | Region 2 | A-F09 | ColLer4F2 |
| 0.055009755 | CHH | Ler | CL | Region 2 | A-F09 | ColLer4F2 |
| 0.873175586 | CG  | Col | CL | Region 1 | A-G09 | ColLer4F2 |
| 0.532776855 | CHG | Col | CL | Region 1 | A-G09 | ColLer4F2 |
| 0.408567115 | CHH | Col | CL | Region 1 | A-G09 | ColLer4F2 |
| 0.607755054 | CG  | Ler | CL | Region 1 | A-G09 | ColLer4F2 |
| 0.438909818 | CHG | Ler | CL | Region 1 | A-G09 | ColLer4F2 |
| 0.446850955 | CHH | Ler | CL | Region 1 | A-G09 | ColLer4F2 |
| 0.870654505 | CG  | Ler | LL | Region 2 | A-G09 | ColLer4F2 |
| 0.445416499 | CHG | Ler | LL | Region 2 | A-G09 | ColLer4F2 |
| 0.060577011 | CHH | Ler | LL | Region 2 | A-G09 | ColLer4F2 |
| 0.84781491  | CG  | Col | CC | Region 1 | A-H09 | ColLer4F2 |
| 0.518479451 | CHG | Col | CC | Region 1 | A-H09 | ColLer4F2 |
| 0.382598966 | CHH | Col | CC | Region 1 | A-H09 | ColLer4F2 |
| 0.914190138 | CG  | Col | CL | Region 2 | A-H09 | ColLer4F2 |
| 0.476771399 | CHG | Col | CL | Region 2 | A-H09 | ColLer4F2 |
| 0.073243214 | CHH | Col | CL | Region 2 | A-H09 | ColLer4F2 |
| 0.863136335 | CG  | Ler | CL | Region 2 | A-H09 | ColLer4F2 |
| 0.417549084 | CHG | Ler | CL | Region 2 | A-H09 | ColLer4F2 |
| 0.065116699 | CHH | Ler | CL | Region 2 | A-H09 | ColLer4F2 |
| 0.688741722 | CG  | Col | CL | Region 1 | A-A10 | ColLer4F2 |
| 0.290542311 | CHG | Col | CL | Region 1 | A-A10 | ColLer4F2 |
| 0.158465436 | CHH | Col | CL | Region 1 | A-A10 | ColLer4F2 |
| 0.162731707 | CG  | Ler | CL | Region 1 | A-A10 | ColLer4F2 |
| 0.100531546 | CHG | Ler | CL | Region 1 | A-A10 | ColLer4F2 |
| 0.123870444 | CHH | Ler | CL | Region 1 | A-A10 | ColLer4F2 |
| 0.914916317 | CG  | Col | CL | Region 2 | A-A10 | ColLer4F2 |
| 0.479485609 | CHG | Col | CL | Region 2 | A-A10 | ColLer4F2 |
| 0.067261441 | CHH | Col | CL | Region 2 | A-A10 | ColLer4F2 |
| 0.846613691 | CG  | Ler | CL | Region 2 | A-A10 | ColLer4F2 |

|             |     |     |    |          |       |           |
|-------------|-----|-----|----|----------|-------|-----------|
| 0.403042288 | CHG | Ler | CL | Region 2 | A-A10 | ColLer4F2 |
| 0.054057347 | CHH | Ler | CL | Region 2 | A-A10 | ColLer4F2 |
| 0.754795278 | CG  | Col | CC | Region 1 | A-B10 | ColLer4F2 |
| 0.404493973 | CHG | Col | CC | Region 1 | A-B10 | ColLer4F2 |
| 0.295517313 | CHH | Col | CC | Region 1 | A-B10 | ColLer4F2 |
| 0.917055944 | CG  | Col | CC | Region 2 | A-B10 | ColLer4F2 |
| 0.518957642 | CHG | Col | CC | Region 2 | A-B10 | ColLer4F2 |
| 0.072258886 | CHH | Col | CC | Region 2 | A-B10 | ColLer4F2 |
| 0.315019689 | CG  | Col | CL | Region 1 | A-C10 | ColLer4F2 |
| 0.021546635 | CHG | Col | CL | Region 1 | A-C10 | ColLer4F2 |
| 0.01277185  | CHH | Col | CL | Region 1 | A-C10 | ColLer4F2 |
| 0.109116809 | CG  | Ler | CL | Region 1 | A-C10 | ColLer4F2 |
| 0.01676727  | CHG | Ler | CL | Region 1 | A-C10 | ColLer4F2 |
| 0.009616811 | CHH | Ler | CL | Region 1 | A-C10 | ColLer4F2 |
| 0.922465895 | CG  | Col | CL | Region 2 | A-C10 | ColLer4F2 |
| 0.470006244 | CHG | Col | CL | Region 2 | A-C10 | ColLer4F2 |
| 0.064262501 | CHH | Col | CL | Region 2 | A-C10 | ColLer4F2 |
| 0.890100592 | CG  | Ler | CL | Region 2 | A-C10 | ColLer4F2 |
| 0.418270491 | CHG | Ler | CL | Region 2 | A-C10 | ColLer4F2 |
| 0.054864199 | CHH | Ler | CL | Region 2 | A-C10 | ColLer4F2 |
| 0.910703364 | CG  | Col | CC | Region 1 | A-D10 | ColLer4F2 |
| 0.624840699 | CHG | Col | CC | Region 1 | A-D10 | ColLer4F2 |
| 0.350516085 | CHH | Col | CC | Region 1 | A-D10 | ColLer4F2 |
| 0.895003571 | CG  | Ler | LL | Region 2 | A-D10 | ColLer4F2 |
| 0.489205772 | CHG | Ler | LL | Region 2 | A-D10 | ColLer4F2 |
| 0.055588287 | CHH | Ler | LL | Region 2 | A-D10 | ColLer4F2 |
| 0.190753425 | CG  | Col | CL | Region 1 | A-E10 | ColLer4F2 |
| 0.076612632 | CHG | Col | CL | Region 1 | A-E10 | ColLer4F2 |
| 0.039915748 | CHH | Col | CL | Region 1 | A-E10 | ColLer4F2 |
| 0.074159021 | CG  | Ler | CL | Region 1 | A-E10 | ColLer4F2 |
| 0.042663996 | CHG | Ler | CL | Region 1 | A-E10 | ColLer4F2 |
| 0.031413034 | CHH | Ler | CL | Region 1 | A-E10 | ColLer4F2 |
| 0.911611731 | CG  | Col | CC | Region 2 | A-E10 | ColLer4F2 |
| 0.466791394 | CHG | Col | CC | Region 2 | A-E10 | ColLer4F2 |
| 0.065582523 | CHH | Col | CC | Region 2 | A-E10 | ColLer4F2 |
| 0.020310766 | CG  | Ler | LL | Region 1 | A-F10 | ColLer4F2 |

|             |     |     |    |          |       |           |
|-------------|-----|-----|----|----------|-------|-----------|
| 0.009684063 | CHG | Ler | LL | Region 1 | A-F10 | ColLer4F2 |
| 0.008149936 | CHH | Ler | LL | Region 1 | A-F10 | ColLer4F2 |
| 0.931970811 | CG  | Col | CL | Region 2 | A-F10 | ColLer4F2 |
| 0.493735431 | CHG | Col | CL | Region 2 | A-F10 | ColLer4F2 |
| 0.066597184 | CHH | Col | CL | Region 2 | A-F10 | ColLer4F2 |
| 0.852630559 | CG  | Ler | CL | Region 2 | A-F10 | ColLer4F2 |
| 0.415642518 | CHG | Ler | CL | Region 2 | A-F10 | ColLer4F2 |
| 0.051016001 | CHH | Ler | CL | Region 2 | A-F10 | ColLer4F2 |
| 0.40199268  | CG  | Col | CL | Region 1 | A-G10 | ColLer4F2 |
| 0.259345607 | CHG | Col | CL | Region 1 | A-G10 | ColLer4F2 |
| 0.193548956 | CHH | Col | CL | Region 1 | A-G10 | ColLer4F2 |
| 0.229724902 | CG  | Ler | CL | Region 1 | A-G10 | ColLer4F2 |
| 0.146841327 | CHG | Ler | CL | Region 1 | A-G10 | ColLer4F2 |
| 0.183348301 | CHH | Ler | CL | Region 1 | A-G10 | ColLer4F2 |
| 0.940831249 | CG  | Col | CL | Region 2 | A-G10 | ColLer4F2 |
| 0.529806299 | CHG | Col | CL | Region 2 | A-G10 | ColLer4F2 |
| 0.083871031 | CHH | Col | CL | Region 2 | A-G10 | ColLer4F2 |
| 0.899844972 | CG  | Ler | CL | Region 2 | A-G10 | ColLer4F2 |
| 0.489958386 | CHG | Ler | CL | Region 2 | A-G10 | ColLer4F2 |
| 0.073376182 | CHH | Ler | CL | Region 2 | A-G10 | ColLer4F2 |
| 0.829170384 | CG  | Col | CL | Region 1 | A-H10 | ColLer4F2 |
| 0.470758693 | CHG | Col | CL | Region 1 | A-H10 | ColLer4F2 |
| 0.255889599 | CHH | Col | CL | Region 1 | A-H10 | ColLer4F2 |
| 0.456210647 | CG  | Ler | CL | Region 1 | A-H10 | ColLer4F2 |
| 0.328846154 | CHG | Ler | CL | Region 1 | A-H10 | ColLer4F2 |
| 0.263178785 | CHH | Ler | CL | Region 1 | A-H10 | ColLer4F2 |
| 0.929766912 | CG  | Col | CL | Region 2 | A-H10 | ColLer4F2 |
| 0.552728073 | CHG | Col | CL | Region 2 | A-H10 | ColLer4F2 |
| 0.069477158 | CHH | Col | CL | Region 2 | A-H10 | ColLer4F2 |
| 0.883438744 | CG  | Ler | CL | Region 2 | A-H10 | ColLer4F2 |
| 0.499490556 | CHG | Ler | CL | Region 2 | A-H10 | ColLer4F2 |
| 0.056914856 | CHH | Ler | CL | Region 2 | A-H10 | ColLer4F2 |
| 0.064527758 | CG  | Ler | LL | Region 1 | A-A11 | ColLer4F2 |
| 0.028958806 | CHG | Ler | LL | Region 1 | A-A11 | ColLer4F2 |
| 0.024980964 | CHH | Ler | LL | Region 1 | A-A11 | ColLer4F2 |
| 0.908559511 | CG  | Col | CL | Region 2 | A-A11 | ColLer4F2 |

|             |     |     |    |          |       |           |
|-------------|-----|-----|----|----------|-------|-----------|
| 0.433179724 | CHG | Col | CL | Region 2 | A-A11 | ColLer4F2 |
| 0.059655037 | CHH | Col | CL | Region 2 | A-A11 | ColLer4F2 |
| 0.861479782 | CG  | Ler | CL | Region 2 | A-A11 | ColLer4F2 |
| 0.395431761 | CHG | Ler | CL | Region 2 | A-A11 | ColLer4F2 |
| 0.053512933 | CHH | Ler | CL | Region 2 | A-A11 | ColLer4F2 |
| 0.234827382 | CG  | Ler | LL | Region 1 | A-B11 | ColLer4F2 |
| 0.165248604 | CHG | Ler | LL | Region 1 | A-B11 | ColLer4F2 |
| 0.262344125 | CHH | Ler | LL | Region 1 | A-B11 | ColLer4F2 |
| 0.901511668 | CG  | Col | CL | Region 2 | A-B11 | ColLer4F2 |
| 0.492684097 | CHG | Col | CL | Region 2 | A-B11 | ColLer4F2 |
| 0.073575419 | CHH | Col | CL | Region 2 | A-B11 | ColLer4F2 |
| 0.839048826 | CG  | Ler | CL | Region 2 | A-B11 | ColLer4F2 |
| 0.427190488 | CHG | Ler | CL | Region 2 | A-B11 | ColLer4F2 |
| 0.058736143 | CHH | Ler | CL | Region 2 | A-B11 | ColLer4F2 |
| 0.324185249 | CG  | Col | CL | Region 1 | A-C11 | ColLer4F2 |
| 0.055353979 | CHG | Col | CL | Region 1 | A-C11 | ColLer4F2 |
| 0.011998731 | CHH | Col | CL | Region 1 | A-C11 | ColLer4F2 |
| 0.039232781 | CG  | Ler | CL | Region 1 | A-C11 | ColLer4F2 |
| 0.010994674 | CHG | Ler | CL | Region 1 | A-C11 | ColLer4F2 |
| 0.008443151 | CHH | Ler | CL | Region 1 | A-C11 | ColLer4F2 |
| 0.940444302 | CG  | Col | CC | Region 2 | A-C11 | ColLer4F2 |
| 0.55013992  | CHG | Col | CC | Region 2 | A-C11 | ColLer4F2 |
| 0.081908816 | CHH | Col | CC | Region 2 | A-C11 | ColLer4F2 |
| 0.560734463 | CG  | Col | CL | Region 1 | A-D11 | ColLer4F2 |
| 0.190639481 | CHG | Col | CL | Region 1 | A-D11 | ColLer4F2 |
| 0.060286652 | CHH | Col | CL | Region 1 | A-D11 | ColLer4F2 |
| 0.122789288 | CG  | Ler | CL | Region 1 | A-D11 | ColLer4F2 |
| 0.054975644 | CHG | Ler | CL | Region 1 | A-D11 | ColLer4F2 |
| 0.034603063 | CHH | Ler | CL | Region 1 | A-D11 | ColLer4F2 |
| 0.924147202 | CG  | Col | CL | Region 2 | A-D11 | ColLer4F2 |
| 0.524973313 | CHG | Col | CL | Region 2 | A-D11 | ColLer4F2 |
| 0.077121688 | CHH | Col | CL | Region 2 | A-D11 | ColLer4F2 |
| 0.894405695 | CG  | Ler | CL | Region 2 | A-D11 | ColLer4F2 |
| 0.465251544 | CHG | Ler | CL | Region 2 | A-D11 | ColLer4F2 |
| 0.061226936 | CHH | Ler | CL | Region 2 | A-D11 | ColLer4F2 |
| 0.511234797 | CG  | Col | CL | Region 1 | A-E11 | ColLer4F2 |

|             |     |     |    |          |       |           |
|-------------|-----|-----|----|----------|-------|-----------|
| 0.077223533 | CHG | Col | CL | Region 1 | A-E11 | ColLer4F2 |
| 0.019877292 | CHH | Col | CL | Region 1 | A-E11 | ColLer4F2 |
| 0.033625385 | CG  | Ler | CL | Region 1 | A-E11 | ColLer4F2 |
| 0.010935601 | CHG | Ler | CL | Region 1 | A-E11 | ColLer4F2 |
| 0.007934212 | CHH | Ler | CL | Region 1 | A-E11 | ColLer4F2 |
| 0.937415649 | CG  | Col | CL | Region 2 | A-E11 | ColLer4F2 |
| 0.506089878 | CHG | Col | CL | Region 2 | A-E11 | ColLer4F2 |
| 0.072418208 | CHH | Col | CL | Region 2 | A-E11 | ColLer4F2 |
| 0.852434128 | CG  | Ler | CL | Region 2 | A-E11 | ColLer4F2 |
| 0.416356248 | CHG | Ler | CL | Region 2 | A-E11 | ColLer4F2 |
| 0.054521714 | CHH | Ler | CL | Region 2 | A-E11 | ColLer4F2 |
| 0.415519126 | CG  | Col | CL | Region 1 | A-F11 | ColLer4F2 |
| 0.068381972 | CHG | Col | CL | Region 1 | A-F11 | ColLer4F2 |
| 0.016213639 | CHH | Col | CL | Region 1 | A-F11 | ColLer4F2 |
| 0.057490212 | CG  | Ler | CL | Region 1 | A-F11 | ColLer4F2 |
| 0.011235955 | CHG | Ler | CL | Region 1 | A-F11 | ColLer4F2 |
| 0.008370988 | CHH | Ler | CL | Region 1 | A-F11 | ColLer4F2 |
| 0.918039216 | CG  | Col | CL | Region 2 | A-F11 | ColLer4F2 |
| 0.487718149 | CHG | Col | CL | Region 2 | A-F11 | ColLer4F2 |
| 0.058910087 | CHH | Col | CL | Region 2 | A-F11 | ColLer4F2 |
| 0.837777778 | CG  | Ler | CL | Region 2 | A-F11 | ColLer4F2 |
| 0.427743374 | CHG | Ler | CL | Region 2 | A-F11 | ColLer4F2 |
| 0.048931647 | CHH | Ler | CL | Region 2 | A-F11 | ColLer4F2 |
| 0.675319149 | CG  | Col | CC | Region 1 | A-G11 | ColLer4F2 |
| 0.278757939 | CHG | Col | CC | Region 1 | A-G11 | ColLer4F2 |
| 0.08514004  | CHH | Col | CC | Region 1 | A-G11 | ColLer4F2 |
| 0.902490451 | CG  | Col | CL | Region 2 | A-G11 | ColLer4F2 |
| 0.546271706 | CHG | Col | CL | Region 2 | A-G11 | ColLer4F2 |
| 0.077602506 | CHH | Col | CL | Region 2 | A-G11 | ColLer4F2 |
| 0.851957248 | CG  | Ler | CL | Region 2 | A-G11 | ColLer4F2 |
| 0.48682102  | CHG | Ler | CL | Region 2 | A-G11 | ColLer4F2 |
| 0.0601627   | CHH | Ler | CL | Region 2 | A-G11 | ColLer4F2 |
| 0.850322008 | CG  | Col | CC | Region 1 | A-H11 | ColLer4F2 |
| 0.498299519 | CHG | Col | CC | Region 1 | A-H11 | ColLer4F2 |
| 0.384138046 | CHH | Col | CC | Region 1 | A-H11 | ColLer4F2 |
| 0.911376066 | CG  | Col | CL | Region 2 | A-H11 | ColLer4F2 |

|             |     |     |    |          |       |           |
|-------------|-----|-----|----|----------|-------|-----------|
| 0.522231662 | CHG | Col | CL | Region 2 | A-H11 | ColLer4F2 |
| 0.085398768 | CHH | Col | CL | Region 2 | A-H11 | ColLer4F2 |
| 0.838134384 | CG  | Ler | CL | Region 2 | A-H11 | ColLer4F2 |
| 0.445877607 | CHG | Ler | CL | Region 2 | A-H11 | ColLer4F2 |
| 0.062672887 | CHH | Ler | CL | Region 2 | A-H11 | ColLer4F2 |
| 0.053251183 | CG  | Ler | LL | Region 1 | A-A12 | ColLer4F2 |
| 0.01990785  | CHG | Ler | LL | Region 1 | A-A12 | ColLer4F2 |
| 0.016699014 | CHH | Ler | LL | Region 1 | A-A12 | ColLer4F2 |
| 0.909787484 | CG  | Col | CC | Region 2 | A-A12 | ColLer4F2 |
| 0.480731917 | CHG | Col | CC | Region 2 | A-A12 | ColLer4F2 |
| 0.067802059 | CHH | Col | CC | Region 2 | A-A12 | ColLer4F2 |
| 0.612997526 | CG  | Col | CL | Region 1 | A-B12 | ColLer4F2 |
| 0.242273535 | CHG | Col | CL | Region 1 | A-B12 | ColLer4F2 |
| 0.121178378 | CHH | Col | CL | Region 1 | A-B12 | ColLer4F2 |
| 0.201899795 | CG  | Ler | CL | Region 1 | A-B12 | ColLer4F2 |
| 0.10301121  | CHG | Ler | CL | Region 1 | A-B12 | ColLer4F2 |
| 0.080765813 | CHH | Ler | CL | Region 1 | A-B12 | ColLer4F2 |
| 0.905866906 | CG  | Col | CC | Region 2 | A-B12 | ColLer4F2 |
| 0.536936776 | CHG | Col | CC | Region 2 | A-B12 | ColLer4F2 |
| 0.07178377  | CHH | Col | CC | Region 2 | A-B12 | ColLer4F2 |
| 0.843783209 | CG  | Col | CL | Region 1 | A-C12 | ColLer4F2 |
| 0.513451974 | CHG | Col | CL | Region 1 | A-C12 | ColLer4F2 |
| 0.285986241 | CHH | Col | CL | Region 1 | A-C12 | ColLer4F2 |
| 0.384103812 | CG  | Ler | CL | Region 1 | A-C12 | ColLer4F2 |
| 0.291474654 | CHG | Ler | CL | Region 1 | A-C12 | ColLer4F2 |
| 0.276705711 | CHH | Ler | CL | Region 1 | A-C12 | ColLer4F2 |
| 0.933088084 | CG  | Col | CL | Region 2 | A-C12 | ColLer4F2 |
| 0.556734238 | CHG | Col | CL | Region 2 | A-C12 | ColLer4F2 |
| 0.085314685 | CHH | Col | CL | Region 2 | A-C12 | ColLer4F2 |
| 0.880042139 | CG  | Ler | CL | Region 2 | A-C12 | ColLer4F2 |
| 0.470034762 | CHG | Ler | CL | Region 2 | A-C12 | ColLer4F2 |
| 0.061105534 | CHH | Ler | CL | Region 2 | A-C12 | ColLer4F2 |
| 0.140244613 | CG  | Ler | LL | Region 1 | A-D12 | ColLer4F2 |
| 0.078812081 | CHG | Ler | LL | Region 1 | A-D12 | ColLer4F2 |
| 0.058705459 | CHH | Ler | LL | Region 1 | A-D12 | ColLer4F2 |
| 0.917734265 | CG  | Col | CC | Region 2 | A-D12 | ColLer4F2 |

|             |     |     |    |          |       |           |
|-------------|-----|-----|----|----------|-------|-----------|
| 0.466972017 | CHG | Col | CC | Region 2 | A-D12 | ColLer4F2 |
| 0.054833166 | CHH | Col | CC | Region 2 | A-D12 | ColLer4F2 |
| 0.836111442 | CG  | Col | CC | Region 1 | A-E12 | ColLer4F2 |
| 0.529538685 | CHG | Col | CC | Region 1 | A-E12 | ColLer4F2 |
| 0.369367935 | CHH | Col | CC | Region 1 | A-E12 | ColLer4F2 |
| 0.925917132 | CG  | Col | CL | Region 2 | A-E12 | ColLer4F2 |
| 0.516105055 | CHG | Col | CL | Region 2 | A-E12 | ColLer4F2 |
| 0.075566773 | CHH | Col | CL | Region 2 | A-E12 | ColLer4F2 |
| 0.881473148 | CG  | Ler | CL | Region 2 | A-E12 | ColLer4F2 |
| 0.463732862 | CHG | Ler | CL | Region 2 | A-E12 | ColLer4F2 |
| 0.062922978 | CHH | Ler | CL | Region 2 | A-E12 | ColLer4F2 |
| 0.667995651 | CG  | Col | CL | Region 1 | A-F12 | ColLer4F2 |
| 0.283473028 | CHG | Col | CL | Region 1 | A-F12 | ColLer4F2 |
| 0.164160302 | CHH | Col | CL | Region 1 | A-F12 | ColLer4F2 |
| 0.164830386 | CG  | Ler | CL | Region 1 | A-F12 | ColLer4F2 |
| 0.096413068 | CHG | Ler | CL | Region 1 | A-F12 | ColLer4F2 |
| 0.114631815 | CHH | Ler | CL | Region 1 | A-F12 | ColLer4F2 |
| 0.90803143  | CG  | Col | CC | Region 2 | A-F12 | ColLer4F2 |
| 0.456635572 | CHG | Col | CC | Region 2 | A-F12 | ColLer4F2 |
| 0.068242551 | CHH | Col | CC | Region 2 | A-F12 | ColLer4F2 |
| 0.528802805 | CG  | Col | CL | Region 1 | A-G12 | ColLer4F2 |
| 0.147573326 | CHG | Col | CL | Region 1 | A-G12 | ColLer4F2 |
| 0.05428302  | CHH | Col | CL | Region 1 | A-G12 | ColLer4F2 |
| 0.149370232 | CG  | Ler | CL | Region 1 | A-G12 | ColLer4F2 |
| 0.066414989 | CHG | Ler | CL | Region 1 | A-G12 | ColLer4F2 |
| 0.038970259 | CHH | Ler | CL | Region 1 | A-G12 | ColLer4F2 |
| 0.906138477 | CG  | Col | CC | Region 2 | A-G12 | ColLer4F2 |
| 0.507390909 | CHG | Col | CC | Region 2 | A-G12 | ColLer4F2 |
| 0.061673316 | CHH | Col | CC | Region 2 | A-G12 | ColLer4F2 |
| 0.766276907 | CG  | Col | CC | Region 1 | B-A01 | LerCol3F2 |
| 0.404818139 | CHG | Col | CC | Region 1 | B-A01 | LerCol3F2 |
| 0.238679479 | CHH | Col | CC | Region 1 | B-A01 | LerCol3F2 |
| 0.910792439 | CG  | Col | CL | Region 2 | B-A01 | LerCol3F2 |
| 0.491041839 | CHG | Col | CL | Region 2 | B-A01 | LerCol3F2 |
| 0.056488779 | CHH | Col | CL | Region 2 | B-A01 | LerCol3F2 |
| 0.912327124 | CG  | Ler | CL | Region 2 | B-A01 | LerCol3F2 |

|             |     |     |    |          |       |           |
|-------------|-----|-----|----|----------|-------|-----------|
| 0.471462264 | CHG | Ler | CL | Region 2 | B-A01 | LerCol3F2 |
| 0.05556747  | CHH | Ler | CL | Region 2 | B-A01 | LerCol3F2 |
| 0.646757054 | CG  | Col | CL | Region 1 | B-B01 | LerCol3F2 |
| 0.222230237 | CHG | Col | CL | Region 1 | B-B01 | LerCol3F2 |
| 0.038924015 | CHH | Col | CL | Region 1 | B-B01 | LerCol3F2 |
| 0.146250665 | CG  | Ler | CL | Region 1 | B-B01 | LerCol3F2 |
| 0.061744779 | CHG | Ler | CL | Region 1 | B-B01 | LerCol3F2 |
| 0.026504983 | CHH | Ler | CL | Region 1 | B-B01 | LerCol3F2 |
| 0.903710849 | CG  | Col | CC | Region 2 | B-B01 | LerCol3F2 |
| 0.504945809 | CHG | Col | CC | Region 2 | B-B01 | LerCol3F2 |
| 0.05900815  | CHH | Col | CC | Region 2 | B-B01 | LerCol3F2 |
| 0.524803388 | CG  | Col | CL | Region 1 | B-C01 | LerCol3F2 |
| 0.130393325 | CHG | Col | CL | Region 1 | B-C01 | LerCol3F2 |
| 0.020342725 | CHH | Col | CL | Region 1 | B-C01 | LerCol3F2 |
| 0.317046208 | CG  | Ler | CL | Region 1 | B-C01 | LerCol3F2 |
| 0.111169057 | CHG | Ler | CL | Region 1 | B-C01 | LerCol3F2 |
| 0.014895863 | CHH | Ler | CL | Region 1 | B-C01 | LerCol3F2 |
| 0.928870902 | CG  | Ler | LL | Region 2 | B-C01 | LerCol3F2 |
| 0.510167348 | CHG | Ler | LL | Region 2 | B-C01 | LerCol3F2 |
| 0.05700574  | CHH | Ler | LL | Region 2 | B-C01 | LerCol3F2 |
| 0.65078329  | CG  | Col | CL | Region 1 | B-D01 | LerCol3F2 |
| 0.235127843 | CHG | Col | CL | Region 1 | B-D01 | LerCol3F2 |
| 0.076661712 | CHH | Col | CL | Region 1 | B-D01 | LerCol3F2 |
| 0.133511859 | CG  | Ler | CL | Region 1 | B-D01 | LerCol3F2 |
| 0.068592871 | CHG | Ler | CL | Region 1 | B-D01 | LerCol3F2 |
| 0.048936346 | CHH | Ler | CL | Region 1 | B-D01 | LerCol3F2 |
| 0.930600119 | CG  | Col | CC | Region 2 | B-D01 | LerCol3F2 |
| 0.513101087 | CHG | Col | CC | Region 2 | B-D01 | LerCol3F2 |
| 0.068673731 | CHH | Col | CC | Region 2 | B-D01 | LerCol3F2 |
| 0.522450239 | CG  | Col | CL | Region 1 | B-E01 | LerCol3F2 |
| 0.200255412 | CHG | Col | CL | Region 1 | B-E01 | LerCol3F2 |
| 0.091058871 | CHH | Col | CL | Region 1 | B-E01 | LerCol3F2 |
| 0.465578111 | CG  | Ler | CL | Region 1 | B-E01 | LerCol3F2 |
| 0.244214373 | CHG | Ler | CL | Region 1 | B-E01 | LerCol3F2 |
| 0.108853578 | CHH | Ler | CL | Region 1 | B-E01 | LerCol3F2 |
| 0.920193152 | CG  | Col | CL | Region 2 | B-E01 | LerCol3F2 |



|             |     |     |    |          |       |           |
|-------------|-----|-----|----|----------|-------|-----------|
| 0.500024425 | CHG | Col | CL | Region 2 | B-E01 | LerCol3F2 |
| 0.076832834 | CHH | Col | CL | Region 2 | B-E01 | LerCol3F2 |
| 0.918764978 | CG  | Ler | CL | Region 2 | B-E01 | LerCol3F2 |
| 0.480060283 | CHG | Ler | CL | Region 2 | B-E01 | LerCol3F2 |
| 0.074219451 | CHH | Ler | CL | Region 2 | B-E01 | LerCol3F2 |
| 0.858397366 | CG  | Col | CC | Region 1 | B-F01 | LerCol3F2 |
| 0.501646206 | CHG | Col | CC | Region 1 | B-F01 | LerCol3F2 |
| 0.333523362 | CHH | Col | CC | Region 1 | B-F01 | LerCol3F2 |
| 0.935523439 | CG  | Col | CL | Region 2 | B-F01 | LerCol3F2 |
| 0.526037501 | CHG | Col | CL | Region 2 | B-F01 | LerCol3F2 |
| 0.070208207 | CHH | Col | CL | Region 2 | B-F01 | LerCol3F2 |
| 0.927232513 | CG  | Ler | CL | Region 2 | B-F01 | LerCol3F2 |
| 0.497206962 | CHG | Ler | CL | Region 2 | B-F01 | LerCol3F2 |
| 0.064387517 | CHH | Ler | CL | Region 2 | B-F01 | LerCol3F2 |
| 0.797915891 | CG  | Col | CC | Region 1 | B-G01 | LerCol3F2 |
| 0.449583909 | CHG | Col | CC | Region 1 | B-G01 | LerCol3F2 |
| 0.250215831 | CHH | Col | CC | Region 1 | B-G01 | LerCol3F2 |
| 0.903319716 | CG  | Col | CC | Region 2 | B-G01 | LerCol3F2 |
| 0.508177448 | CHG | Col | CC | Region 2 | B-G01 | LerCol3F2 |
| 0.069077917 | CHH | Col | CC | Region 2 | B-G01 | LerCol3F2 |
| 0.518961739 | CG  | Col | CL | Region 1 | B-H01 | LerCol3F2 |
| 0.145943796 | CHG | Col | CL | Region 1 | B-H01 | LerCol3F2 |
| 0.033262665 | CHH | Col | CL | Region 1 | B-H01 | LerCol3F2 |
| 0.127837707 | CG  | Ler | CL | Region 1 | B-H01 | LerCol3F2 |
| 0.039161016 | CHG | Ler | CL | Region 1 | B-H01 | LerCol3F2 |
| 0.016594254 | CHH | Ler | CL | Region 1 | B-H01 | LerCol3F2 |
| 0.925824085 | CG  | Ler | LL | Region 2 | B-H01 | LerCol3F2 |
| 0.487519565 | CHG | Ler | LL | Region 2 | B-H01 | LerCol3F2 |
| 0.066140459 | CHH | Ler | LL | Region 2 | B-H01 | LerCol3F2 |
| 0.066331788 | CG  | Ler | LL | Region 1 | B-A02 | LerCol3F2 |
| 0.022750304 | CHG | Ler | LL | Region 1 | B-A02 | LerCol3F2 |
| 0.011616444 | CHH | Ler | LL | Region 1 | B-A02 | LerCol3F2 |
| 0.928992477 | CG  | Col | CL | Region 2 | B-A02 | LerCol3F2 |
| 0.525137496 | CHG | Col | CL | Region 2 | B-A02 | LerCol3F2 |
| 0.059043938 | CHH | Col | CL | Region 2 | B-A02 | LerCol3F2 |
| 0.924055247 | CG  | Ler | CL | Region 2 | B-A02 | LerCol3F2 |

|             |     |     |    |          |       |           |
|-------------|-----|-----|----|----------|-------|-----------|
| 0.521331173 | CHG | Ler | CL | Region 2 | B-A02 | LerCol3F2 |
| 0.059017361 | CHH | Ler | CL | Region 2 | B-A02 | LerCol3F2 |
| 0.443888194 | CG  | Col | CL | Region 1 | B-B02 | LerCol3F2 |
| 0.117801909 | CHG | Col | CL | Region 1 | B-B02 | LerCol3F2 |
| 0.042259141 | CHH | Col | CL | Region 1 | B-B02 | LerCol3F2 |
| 0.070874862 | CG  | Ler | CL | Region 1 | B-B02 | LerCol3F2 |
| 0.027850305 | CHG | Ler | CL | Region 1 | B-B02 | LerCol3F2 |
| 0.02241937  | CHH | Ler | CL | Region 1 | B-B02 | LerCol3F2 |
| 0.898586113 | CG  | Col | CL | Region 2 | B-B02 | LerCol3F2 |
| 0.463620201 | CHG | Col | CL | Region 2 | B-B02 | LerCol3F2 |
| 0.071903634 | CHH | Col | CL | Region 2 | B-B02 | LerCol3F2 |
| 0.889693356 | CG  | Ler | CL | Region 2 | B-B02 | LerCol3F2 |
| 0.439235741 | CHG | Ler | CL | Region 2 | B-B02 | LerCol3F2 |
| 0.063807748 | CHH | Ler | CL | Region 2 | B-B02 | LerCol3F2 |
| 0.792580703 | CG  | Col | CL | Region 1 | B-C02 | LerCol3F2 |
| 0.378325123 | CHG | Col | CL | Region 1 | B-C02 | LerCol3F2 |
| 0.294502376 | CHH | Col | CL | Region 1 | B-C02 | LerCol3F2 |
| 0.634413039 | CG  | Ler | CL | Region 1 | B-C02 | LerCol3F2 |
| 0.375203252 | CHG | Ler | CL | Region 1 | B-C02 | LerCol3F2 |
| 0.344026805 | CHH | Ler | CL | Region 1 | B-C02 | LerCol3F2 |
| 0.914585635 | CG  | Col | CL | Region 2 | B-C02 | LerCol3F2 |
| 0.440891235 | CHG | Col | CL | Region 2 | B-C02 | LerCol3F2 |
| 0.065763052 | CHH | Col | CL | Region 2 | B-C02 | LerCol3F2 |
| 0.907258396 | CG  | Ler | CL | Region 2 | B-C02 | LerCol3F2 |
| 0.424878616 | CHG | Ler | CL | Region 2 | B-C02 | LerCol3F2 |
| 0.061113745 | CHH | Ler | CL | Region 2 | B-C02 | LerCol3F2 |
| 0.786109928 | CG  | Col | CL | Region 1 | B-D02 | LerCol3F2 |
| 0.427177935 | CHG | Col | CL | Region 1 | B-D02 | LerCol3F2 |
| 0.23381295  | CHH | Col | CL | Region 1 | B-D02 | LerCol3F2 |
| 0.498910675 | CG  | Ler | CL | Region 1 | B-D02 | LerCol3F2 |
| 0.30772164  | CHG | Ler | CL | Region 1 | B-D02 | LerCol3F2 |
| 0.231094548 | CHH | Ler | CL | Region 1 | B-D02 | LerCol3F2 |
| 0.917690556 | CG  | Ler | LL | Region 2 | B-D02 | LerCol3F2 |
| 0.488585505 | CHG | Ler | LL | Region 2 | B-D02 | LerCol3F2 |
| 0.071717974 | CHH | Ler | LL | Region 2 | B-D02 | LerCol3F2 |
| 0.61259542  | CG  | Ler | LL | Region 1 | B-E02 | LerCol3F2 |

|             |     |     |    |          |       |           |
|-------------|-----|-----|----|----------|-------|-----------|
| 0.322112753 | CHG | Ler | LL | Region 1 | B-E02 | LerCol3F2 |
| 0.090253414 | CHH | Ler | LL | Region 1 | B-E02 | LerCol3F2 |
| 0.910513938 | CG  | Col | CL | Region 2 | B-E02 | LerCol3F2 |
| 0.457973999 | CHG | Col | CL | Region 2 | B-E02 | LerCol3F2 |
| 0.057115436 | CHH | Col | CL | Region 2 | B-E02 | LerCol3F2 |
| 0.912173359 | CG  | Ler | CL | Region 2 | B-E02 | LerCol3F2 |
| 0.425136535 | CHG | Ler | CL | Region 2 | B-E02 | LerCol3F2 |
| 0.048168538 | CHH | Ler | CL | Region 2 | B-E02 | LerCol3F2 |
| 0.48961566  | CG  | Col | CL | Region 1 | B-F02 | LerCol3F2 |
| 0.106231898 | CHG | Col | CL | Region 1 | B-F02 | LerCol3F2 |
| 0.021100521 | CHH | Col | CL | Region 1 | B-F02 | LerCol3F2 |
| 0.253820961 | CG  | Ler | CL | Region 1 | B-F02 | LerCol3F2 |
| 0.052987962 | CHG | Ler | CL | Region 1 | B-F02 | LerCol3F2 |
| 0.013427914 | CHH | Ler | CL | Region 1 | B-F02 | LerCol3F2 |
| 0.924701733 | CG  | Col | CL | Region 2 | B-F02 | LerCol3F2 |
| 0.502976004 | CHG | Col | CL | Region 2 | B-F02 | LerCol3F2 |
| 0.063749872 | CHH | Col | CL | Region 2 | B-F02 | LerCol3F2 |
| 0.924053546 | CG  | Ler | CL | Region 2 | B-F02 | LerCol3F2 |
| 0.487399258 | CHG | Ler | CL | Region 2 | B-F02 | LerCol3F2 |
| 0.058659933 | CHH | Ler | CL | Region 2 | B-F02 | LerCol3F2 |
| 0.717874675 | CG  | Ler | LL | Region 1 | B-G02 | LerCol3F2 |
| 0.532735375 | CHG | Ler | LL | Region 1 | B-G02 | LerCol3F2 |
| 0.481476384 | CHH | Ler | LL | Region 1 | B-G02 | LerCol3F2 |
| 0.927511158 | CG  | Col | CC | Region 2 | B-G02 | LerCol3F2 |
| 0.569418858 | CHG | Col | CC | Region 2 | B-G02 | LerCol3F2 |
| 0.079682366 | CHH | Col | CC | Region 2 | B-G02 | LerCol3F2 |
| 0.269688529 | CG  | Ler | LL | Region 1 | B-H02 | LerCol3F2 |
| 0.195490982 | CHG | Ler | LL | Region 1 | B-H02 | LerCol3F2 |
| 0.27879785  | CHH | Ler | LL | Region 1 | B-H02 | LerCol3F2 |
| 0.922282806 | CG  | Col | CL | Region 2 | B-H02 | LerCol3F2 |
| 0.49756454  | CHG | Col | CL | Region 2 | B-H02 | LerCol3F2 |
| 0.077901114 | CHH | Col | CL | Region 2 | B-H02 | LerCol3F2 |
| 0.913629595 | CG  | Ler | CL | Region 2 | B-H02 | LerCol3F2 |
| 0.478368841 | CHG | Ler | CL | Region 2 | B-H02 | LerCol3F2 |
| 0.063550558 | CHH | Ler | CL | Region 2 | B-H02 | LerCol3F2 |
| 0.765201686 | CG  | Col | CL | Region 1 | B-A03 | LerCol3F2 |

|             |     |     |    |          |       |           |
|-------------|-----|-----|----|----------|-------|-----------|
| 0.415535983 | CHG | Col | CL | Region 1 | B-A03 | LerCol3F2 |
| 0.219819788 | CHH | Col | CL | Region 1 | B-A03 | LerCol3F2 |
| 0.185822785 | CG  | Ler | CL | Region 1 | B-A03 | LerCol3F2 |
| 0.129514073 | CHG | Ler | CL | Region 1 | B-A03 | LerCol3F2 |
| 0.131320379 | CHH | Ler | CL | Region 1 | B-A03 | LerCol3F2 |
| 0.929464241 | CG  | Ler | LL | Region 2 | B-A03 | LerCol3F2 |
| 0.536393771 | CHG | Ler | LL | Region 2 | B-A03 | LerCol3F2 |
| 0.081163247 | CHH | Ler | LL | Region 2 | B-A03 | LerCol3F2 |
| 0.849424712 | CG  | Col | CL | Region 1 | B-B03 | LerCol3F2 |
| 0.534616148 | CHG | Col | CL | Region 1 | B-B03 | LerCol3F2 |
| 0.313855631 | CHH | Col | CL | Region 1 | B-B03 | LerCol3F2 |
| 0.328836425 | CG  | Ler | CL | Region 1 | B-B03 | LerCol3F2 |
| 0.262736374 | CHG | Ler | CL | Region 1 | B-B03 | LerCol3F2 |
| 0.281699761 | CHH | Ler | CL | Region 1 | B-B03 | LerCol3F2 |
| 0.928588471 | CG  | Ler | LL | Region 2 | B-B03 | LerCol3F2 |
| 0.531300801 | CHG | Ler | LL | Region 2 | B-B03 | LerCol3F2 |
| 0.083050923 | CHH | Ler | LL | Region 2 | B-B03 | LerCol3F2 |
| 0.776780809 | CG  | Col | CL | Region 1 | B-C03 | LerCol3F2 |
| 0.443962087 | CHG | Col | CL | Region 1 | B-C03 | LerCol3F2 |
| 0.256671626 | CHH | Col | CL | Region 1 | B-C03 | LerCol3F2 |
| 0.305823017 | CG  | Ler | CL | Region 1 | B-C03 | LerCol3F2 |
| 0.218594555 | CHG | Ler | CL | Region 1 | B-C03 | LerCol3F2 |
| 0.240054788 | CHH | Ler | CL | Region 1 | B-C03 | LerCol3F2 |
| 0.92103478  | CG  | Col | CL | Region 2 | B-C03 | LerCol3F2 |
| 0.526378095 | CHG | Col | CL | Region 2 | B-C03 | LerCol3F2 |
| 0.074585558 | CHH | Col | CL | Region 2 | B-C03 | LerCol3F2 |
| 0.908676759 | CG  | Ler | CL | Region 2 | B-C03 | LerCol3F2 |
| 0.49809641  | CHG | Ler | CL | Region 2 | B-C03 | LerCol3F2 |
| 0.071859093 | CHH | Ler | CL | Region 2 | B-C03 | LerCol3F2 |
| 0.675303066 | CG  | Col | CL | Region 1 | B-D03 | LerCol3F2 |
| 0.30382708  | CHG | Col | CL | Region 1 | B-D03 | LerCol3F2 |
| 0.091617813 | CHH | Col | CL | Region 1 | B-D03 | LerCol3F2 |
| 0.171792153 | CG  | Ler | CL | Region 1 | B-D03 | LerCol3F2 |
| 0.112405116 | CHG | Ler | CL | Region 1 | B-D03 | LerCol3F2 |
| 0.068680627 | CHH | Ler | CL | Region 1 | B-D03 | LerCol3F2 |
| 0.934962499 | CG  | Col | CL | Region 2 | B-D03 | LerCol3F2 |

|             |     |     |    |          |       |           |
|-------------|-----|-----|----|----------|-------|-----------|
| 0.547818396 | CHG | Col | CL | Region 2 | B-D03 | LerCol3F2 |
| 0.072775329 | CHH | Col | CL | Region 2 | B-D03 | LerCol3F2 |
| 0.933140097 | CG  | Ler | CL | Region 2 | B-D03 | LerCol3F2 |
| 0.525614489 | CHG | Ler | CL | Region 2 | B-D03 | LerCol3F2 |
| 0.066961874 | CHH | Ler | CL | Region 2 | B-D03 | LerCol3F2 |
| 0.808507249 | CG  | Col | CC | Region 1 | B-E03 | LerCol3F2 |
| 0.431568056 | CHG | Col | CC | Region 1 | B-E03 | LerCol3F2 |
| 0.282656908 | CHH | Col | CC | Region 1 | B-E03 | LerCol3F2 |
| 0.91553804  | CG  | Ler | LL | Region 2 | B-E03 | LerCol3F2 |
| 0.430300784 | CHG | Ler | LL | Region 2 | B-E03 | LerCol3F2 |
| 0.060791709 | CHH | Ler | LL | Region 2 | B-E03 | LerCol3F2 |
| 0.52579698  | CG  | Col | CL | Region 1 | B-F03 | LerCol3F2 |
| 0.162079763 | CHG | Col | CL | Region 1 | B-F03 | LerCol3F2 |
| 0.02961821  | CHH | Col | CL | Region 1 | B-F03 | LerCol3F2 |
| 0.086191537 | CG  | Ler | CL | Region 1 | B-F03 | LerCol3F2 |
| 0.012798036 | CHG | Ler | CL | Region 1 | B-F03 | LerCol3F2 |
| 0.00840678  | CHH | Ler | CL | Region 1 | B-F03 | LerCol3F2 |
| 0.937683364 | CG  | Ler | LL | Region 2 | B-F03 | LerCol3F2 |
| 0.535185297 | CHG | Ler | LL | Region 2 | B-F03 | LerCol3F2 |
| 0.076637457 | CHH | Ler | LL | Region 2 | B-F03 | LerCol3F2 |
| 0.838186482 | CG  | Col | CC | Region 1 | B-G03 | LerCol3F2 |
| 0.515021715 | CHG | Col | CC | Region 1 | B-G03 | LerCol3F2 |
| 0.331172466 | CHH | Col | CC | Region 1 | B-G03 | LerCol3F2 |
| 0.926158735 | CG  | Col | CL | Region 2 | B-G03 | LerCol3F2 |
| 0.517872611 | CHG | Col | CL | Region 2 | B-G03 | LerCol3F2 |
| 0.072136246 | CHH | Col | CL | Region 2 | B-G03 | LerCol3F2 |
| 0.917170423 | CG  | Ler | CL | Region 2 | B-G03 | LerCol3F2 |
| 0.485014718 | CHG | Ler | CL | Region 2 | B-G03 | LerCol3F2 |
| 0.06982404  | CHH | Ler | CL | Region 2 | B-G03 | LerCol3F2 |
| 0.514937836 | CG  | Col | CL | Region 1 | B-H03 | LerCol3F2 |
| 0.107897421 | CHG | Col | CL | Region 1 | B-H03 | LerCol3F2 |
| 0.021269076 | CHH | Col | CL | Region 1 | B-H03 | LerCol3F2 |
| 0.472162412 | CG  | Ler | CL | Region 1 | B-H03 | LerCol3F2 |
| 0.199321048 | CHG | Ler | CL | Region 1 | B-H03 | LerCol3F2 |
| 0.022518431 | CHH | Ler | CL | Region 1 | B-H03 | LerCol3F2 |
| 0.927885741 | CG  | Col | CL | Region 2 | B-H03 | LerCol3F2 |

|             |     |     |    |          |       |           |
|-------------|-----|-----|----|----------|-------|-----------|
| 0.507056452 | CHG | Col | CL | Region 2 | B-H03 | LerCol3F2 |
| 0.068929769 | CHH | Col | CL | Region 2 | B-H03 | LerCol3F2 |
| 0.927611093 | CG  | Ler | CL | Region 2 | B-H03 | LerCol3F2 |
| 0.482444336 | CHG | Ler | CL | Region 2 | B-H03 | LerCol3F2 |
| 0.05907619  | CHH | Ler | CL | Region 2 | B-H03 | LerCol3F2 |
| 0.894488189 | CG  | Col | CC | Region 1 | B-A04 | LerCol3F2 |
| 0.562329886 | CHG | Col | CC | Region 1 | B-A04 | LerCol3F2 |
| 0.397434153 | CHH | Col | CC | Region 1 | B-A04 | LerCol3F2 |
| 0.927414934 | CG  | Ler | LL | Region 2 | B-A04 | LerCol3F2 |
| 0.479146903 | CHG | Ler | LL | Region 2 | B-A04 | LerCol3F2 |
| 0.063113631 | CHH | Ler | LL | Region 2 | B-A04 | LerCol3F2 |
| 0.125433218 | CG  | Ler | LL | Region 1 | B-B04 | LerCol3F2 |
| 0.079327555 | CHG | Ler | LL | Region 1 | B-B04 | LerCol3F2 |
| 0.130287394 | CHH | Ler | LL | Region 1 | B-B04 | LerCol3F2 |
| 0.917454989 | CG  | Ler | LL | Region 2 | B-B04 | LerCol3F2 |
| 0.436736641 | CHG | Ler | LL | Region 2 | B-B04 | LerCol3F2 |
| 0.057108437 | CHH | Ler | LL | Region 2 | B-B04 | LerCol3F2 |
| 0.37039907  | CG  | Col | CL | Region 1 | B-C04 | LerCol3F2 |
| 0.039093398 | CHG | Col | CL | Region 1 | B-C04 | LerCol3F2 |
| 0.013400054 | CHH | Col | CL | Region 1 | B-C04 | LerCol3F2 |
| 0.017319964 | CG  | Ler | CL | Region 1 | B-C04 | LerCol3F2 |
| 0.008616047 | CHG | Ler | CL | Region 1 | B-C04 | LerCol3F2 |
| 0.00843197  | CHH | Ler | CL | Region 1 | B-C04 | LerCol3F2 |
| 0.91399195  | CG  | Col | CL | Region 2 | B-C04 | LerCol3F2 |
| 0.461806924 | CHG | Col | CL | Region 2 | B-C04 | LerCol3F2 |
| 0.062778798 | CHH | Col | CL | Region 2 | B-C04 | LerCol3F2 |
| 0.910051753 | CG  | Ler | CL | Region 2 | B-C04 | LerCol3F2 |
| 0.434502462 | CHG | Ler | CL | Region 2 | B-C04 | LerCol3F2 |
| 0.05987123  | CHH | Ler | CL | Region 2 | B-C04 | LerCol3F2 |
| 0.814792398 | CG  | Col | CC | Region 1 | B-D04 | LerCol3F2 |
| 0.454380173 | CHG | Col | CC | Region 1 | B-D04 | LerCol3F2 |
| 0.255367326 | CHH | Col | CC | Region 1 | B-D04 | LerCol3F2 |
| 0.935546436 | CG  | Col | CC | Region 2 | B-D04 | LerCol3F2 |
| 0.512988118 | CHG | Col | CC | Region 2 | B-D04 | LerCol3F2 |
| 0.065631926 | CHH | Col | CC | Region 2 | B-D04 | LerCol3F2 |
| 0.473982147 | CG  | Col | CL | Region 1 | B-E04 | LerCol3F2 |

|             |     |     |    |          |       |           |
|-------------|-----|-----|----|----------|-------|-----------|
| 0.114124872 | CHG | Col | CL | Region 1 | B-E04 | LerCol3F2 |
| 0.024954398 | CHH | Col | CL | Region 1 | B-E04 | LerCol3F2 |
| 0.080133051 | CG  | Ler | CL | Region 1 | B-E04 | LerCol3F2 |
| 0.020415473 | CHG | Ler | CL | Region 1 | B-E04 | LerCol3F2 |
| 0.010980599 | CHH | Ler | CL | Region 1 | B-E04 | LerCol3F2 |
| 0.912513527 | CG  | Ler | LL | Region 2 | B-E04 | LerCol3F2 |
| 0.472683483 | CHG | Ler | LL | Region 2 | B-E04 | LerCol3F2 |
| 0.065744105 | CHH | Ler | LL | Region 2 | B-E04 | LerCol3F2 |
| 0.825653031 | CG  | Col | CC | Region 1 | B-F04 | LerCol3F2 |
| 0.518339909 | CHG | Col | CC | Region 1 | B-F04 | LerCol3F2 |
| 0.291990133 | CHH | Col | CC | Region 1 | B-F04 | LerCol3F2 |
| 0.913636002 | CG  | Col | CC | Region 2 | B-F04 | LerCol3F2 |
| 0.518077484 | CHG | Col | CC | Region 2 | B-F04 | LerCol3F2 |
| 0.065806078 | CHH | Col | CC | Region 2 | B-F04 | LerCol3F2 |
| 0.053337922 | CG  | Ler | LL | Region 1 | B-G04 | LerCol4F2 |
| 0.015591253 | CHG | Ler | LL | Region 1 | B-G04 | LerCol4F2 |
| 0.008568533 | CHH | Ler | LL | Region 1 | B-G04 | LerCol4F2 |
| 0.919975004 | CG  | Col | CL | Region 2 | B-G04 | LerCol4F2 |
| 0.443429762 | CHG | Col | CL | Region 2 | B-G04 | LerCol4F2 |
| 0.058268244 | CHH | Col | CL | Region 2 | B-G04 | LerCol4F2 |
| 0.920556107 | CG  | Ler | CL | Region 2 | B-G04 | LerCol4F2 |
| 0.416319238 | CHG | Ler | CL | Region 2 | B-G04 | LerCol4F2 |
| 0.048018311 | CHH | Ler | CL | Region 2 | B-G04 | LerCol4F2 |
| 0.615755627 | CG  | Col | CC | Region 1 | B-H04 | LerCol4F2 |
| 0.233985049 | CHG | Col | CC | Region 1 | B-H04 | LerCol4F2 |
| 0.143113379 | CHH | Col | CC | Region 1 | B-H04 | LerCol4F2 |
| 0.914274706 | CG  | Col | CL | Region 2 | B-H04 | LerCol4F2 |
| 0.440035344 | CHG | Col | CL | Region 2 | B-H04 | LerCol4F2 |
| 0.058699812 | CHH | Col | CL | Region 2 | B-H04 | LerCol4F2 |
| 0.903428687 | CG  | Ler | CL | Region 2 | B-H04 | LerCol4F2 |
| 0.435142905 | CHG | Ler | CL | Region 2 | B-H04 | LerCol4F2 |
| 0.061535861 | CHH | Ler | CL | Region 2 | B-H04 | LerCol4F2 |
| 0.583237921 | CG  | Col | CL | Region 1 | B-A05 | LerCol4F2 |
| 0.190955677 | CHG | Col | CL | Region 1 | B-A05 | LerCol4F2 |
| 0.024783417 | CHH | Col | CL | Region 1 | B-A05 | LerCol4F2 |
| 0.169889914 | CG  | Ler | CL | Region 1 | B-A05 | LerCol4F2 |

|             |     |     |    |          |       |           |
|-------------|-----|-----|----|----------|-------|-----------|
| 0.056892523 | CHG | Ler | CL | Region 1 | B-A05 | LerCol4F2 |
| 0.013305485 | CHH | Ler | CL | Region 1 | B-A05 | LerCol4F2 |
| 0.927306684 | CG  | Col | CC | Region 2 | B-A05 | LerCol4F2 |
| 0.549891866 | CHG | Col | CC | Region 2 | B-A05 | LerCol4F2 |
| 0.064769071 | CHH | Col | CC | Region 2 | B-A05 | LerCol4F2 |
| 0.76787117  | CG  | Col | CL | Region 1 | B-B05 | LerCol4F2 |
| 0.353869969 | CHG | Col | CL | Region 1 | B-B05 | LerCol4F2 |
| 0.185464425 | CHH | Col | CL | Region 1 | B-B05 | LerCol4F2 |
| 0.368635002 | CG  | Ler | CL | Region 1 | B-B05 | LerCol4F2 |
| 0.213442402 | CHG | Ler | CL | Region 1 | B-B05 | LerCol4F2 |
| 0.192182229 | CHH | Ler | CL | Region 1 | B-B05 | LerCol4F2 |
| 0.927710064 | CG  | Col | CC | Region 2 | B-B05 | LerCol4F2 |
| 0.500148444 | CHG | Col | CC | Region 2 | B-B05 | LerCol4F2 |
| 0.068835388 | CHH | Col | CC | Region 2 | B-B05 | LerCol4F2 |
| 0.095992083 | CG  | Ler | LL | Region 1 | B-C05 | LerCol4F2 |
| 0.049474094 | CHG | Ler | LL | Region 1 | B-C05 | LerCol4F2 |
| 0.058075237 | CHH | Ler | LL | Region 1 | B-C05 | LerCol4F2 |
| 0.917935269 | CG  | Col | CL | Region 2 | B-C05 | LerCol4F2 |
| 0.537635557 | CHG | Col | CL | Region 2 | B-C05 | LerCol4F2 |
| 0.06640105  | CHH | Col | CL | Region 2 | B-C05 | LerCol4F2 |
| 0.873445305 | CG  | Ler | CL | Region 2 | B-C05 | LerCol4F2 |
| 0.487947079 | CHG | Ler | CL | Region 2 | B-C05 | LerCol4F2 |
| 0.054117959 | CHH | Ler | CL | Region 2 | B-C05 | LerCol4F2 |
| 0.136768559 | CG  | Ler | LL | Region 1 | B-D05 | LerCol4F2 |
| 0.065664883 | CHG | Ler | LL | Region 1 | B-D05 | LerCol4F2 |
| 0.026162087 | CHH | Ler | LL | Region 1 | B-D05 | LerCol4F2 |
| 0.916134268 | CG  | Ler | LL | Region 2 | B-D05 | LerCol4F2 |
| 0.515124621 | CHG | Ler | LL | Region 2 | B-D05 | LerCol4F2 |
| 0.065000246 | CHH | Ler | LL | Region 2 | B-D05 | LerCol4F2 |
| 0.851344918 | CG  | Col | CC | Region 1 | B-E05 | LerCol4F2 |
| 0.511636654 | CHG | Col | CC | Region 1 | B-E05 | LerCol4F2 |
| 0.354599788 | CHH | Col | CC | Region 1 | B-E05 | LerCol4F2 |
| 0.931635959 | CG  | Col | CL | Region 2 | B-E05 | LerCol4F2 |
| 0.503939162 | CHG | Col | CL | Region 2 | B-E05 | LerCol4F2 |
| 0.06789927  | CHH | Col | CL | Region 2 | B-E05 | LerCol4F2 |
| 0.925033921 | CG  | Ler | CL | Region 2 | B-E05 | LerCol4F2 |



|             |     |     |    |          |       |           |
|-------------|-----|-----|----|----------|-------|-----------|
| 0.478204257 | CHG | Ler | CL | Region 2 | B-E05 | LerCol4F2 |
| 0.064342722 | CHH | Ler | CL | Region 2 | B-E05 | LerCol4F2 |
| 0.803694033 | CG  | Col | CC | Region 1 | B-F05 | LerCol4F2 |
| 0.43839738  | CHG | Col | CC | Region 1 | B-F05 | LerCol4F2 |
| 0.280238721 | CHH | Col | CC | Region 1 | B-F05 | LerCol4F2 |
| 0.918776371 | CG  | Ler | LL | Region 2 | B-F05 | LerCol4F2 |
| 0.465310337 | CHG | Ler | LL | Region 2 | B-F05 | LerCol4F2 |
| 0.061515718 | CHH | Ler | LL | Region 2 | B-F05 | LerCol4F2 |
| 0.695539906 | CG  | Col | CL | Region 1 | B-G05 | LerCol4F2 |
| 0.30553758  | CHG | Col | CL | Region 1 | B-G05 | LerCol4F2 |
| 0.070919683 | CHH | Col | CL | Region 1 | B-G05 | LerCol4F2 |
| 0.314643603 | CG  | Ler | CL | Region 1 | B-G05 | LerCol4F2 |
| 0.203077284 | CHG | Ler | CL | Region 1 | B-G05 | LerCol4F2 |
| 0.064570437 | CHH | Ler | CL | Region 1 | B-G05 | LerCol4F2 |
| 0.927999157 | CG  | Col | CL | Region 2 | B-G05 | LerCol4F2 |
| 0.562177382 | CHG | Col | CL | Region 2 | B-G05 | LerCol4F2 |
| 0.072299317 | CHH | Col | CL | Region 2 | B-G05 | LerCol4F2 |
| 0.9219022   | CG  | Ler | CL | Region 2 | B-G05 | LerCol4F2 |
| 0.548271988 | CHG | Ler | CL | Region 2 | B-G05 | LerCol4F2 |
| 0.067152443 | CHH | Ler | CL | Region 2 | B-G05 | LerCol4F2 |
| 0.016123883 | CG  | Ler | LL | Region 1 | B-A06 | LerCol4F2 |
| 0.008879652 | CHG | Ler | LL | Region 1 | B-A06 | LerCol4F2 |
| 0.007334317 | CHH | Ler | LL | Region 1 | B-A06 | LerCol4F2 |
| 0.914451215 | CG  | Ler | LL | Region 2 | B-A06 | LerCol4F2 |
| 0.458199492 | CHG | Ler | LL | Region 2 | B-A06 | LerCol4F2 |
| 0.051915902 | CHH | Ler | LL | Region 2 | B-A06 | LerCol4F2 |
| 0.701829506 | CG  | Col | CL | Region 1 | B-B06 | LerCol4F2 |
| 0.298096115 | CHG | Col | CL | Region 1 | B-B06 | LerCol4F2 |
| 0.170496727 | CHH | Col | CL | Region 1 | B-B06 | LerCol4F2 |
| 0.244546248 | CG  | Ler | CL | Region 1 | B-B06 | LerCol4F2 |
| 0.145751073 | CHG | Ler | CL | Region 1 | B-B06 | LerCol4F2 |
| 0.127812305 | CHH | Ler | CL | Region 1 | B-B06 | LerCol4F2 |
| 0.922444321 | CG  | Ler | LL | Region 2 | B-B06 | LerCol4F2 |
| 0.477771871 | CHG | Ler | LL | Region 2 | B-B06 | LerCol4F2 |
| 0.066780317 | CHH | Ler | LL | Region 2 | B-B06 | LerCol4F2 |
| 0.778228533 | CG  | Col | CC | Region 1 | B-C06 | LerCol4F2 |

|             |     |     |    |          |       |           |
|-------------|-----|-----|----|----------|-------|-----------|
| 0.369200244 | CHG | Col | CC | Region 1 | B-C06 | LerCol4F2 |
| 0.191622275 | CHH | Col | CC | Region 1 | B-C06 | LerCol4F2 |
| 0.934516732 | CG  | Col | CL | Region 2 | B-C06 | LerCol4F2 |
| 0.46922496  | CHG | Col | CL | Region 2 | B-C06 | LerCol4F2 |
| 0.055164652 | CHH | Col | CL | Region 2 | B-C06 | LerCol4F2 |
| 0.931058795 | CG  | Ler | CL | Region 2 | B-C06 | LerCol4F2 |
| 0.449915717 | CHG | Ler | CL | Region 2 | B-C06 | LerCol4F2 |
| 0.051325474 | CHH | Ler | CL | Region 2 | B-C06 | LerCol4F2 |
| 0.529920692 | CG  | Col | CL | Region 1 | B-D06 | LerCol4F2 |
| 0.129402901 | CHG | Col | CL | Region 1 | B-D06 | LerCol4F2 |
| 0.028269359 | CHH | Col | CL | Region 1 | B-D06 | LerCol4F2 |
| 0.288941335 | CG  | Ler | CL | Region 1 | B-D06 | LerCol4F2 |
| 0.097270077 | CHG | Ler | CL | Region 1 | B-D06 | LerCol4F2 |
| 0.020022182 | CHH | Ler | CL | Region 1 | B-D06 | LerCol4F2 |
| 0.939685511 | CG  | Col | CL | Region 2 | B-D06 | LerCol4F2 |
| 0.500140656 | CHG | Col | CL | Region 2 | B-D06 | LerCol4F2 |
| 0.057536209 | CHH | Col | CL | Region 2 | B-D06 | LerCol4F2 |
| 0.848178459 | CG  | Ler | CL | Region 2 | B-D06 | LerCol4F2 |
| 0.418066183 | CHG | Ler | CL | Region 2 | B-D06 | LerCol4F2 |
| 0.042470343 | CHH | Ler | CL | Region 2 | B-D06 | LerCol4F2 |
| 0.483207676 | CG  | Col | CL | Region 1 | B-E06 | LerCol4F2 |
| 0.119000539 | CHG | Col | CL | Region 1 | B-E06 | LerCol4F2 |
| 0.021311183 | CHH | Col | CL | Region 1 | B-E06 | LerCol4F2 |
| 0.151534527 | CG  | Ler | CL | Region 1 | B-E06 | LerCol4F2 |
| 0.035187287 | CHG | Ler | CL | Region 1 | B-E06 | LerCol4F2 |
| 0.009435013 | CHH | Ler | CL | Region 1 | B-E06 | LerCol4F2 |
| 0.923506439 | CG  | Col | CL | Region 2 | B-E06 | LerCol4F2 |
| 0.51800345  | CHG | Col | CL | Region 2 | B-E06 | LerCol4F2 |
| 0.062466285 | CHH | Col | CL | Region 2 | B-E06 | LerCol4F2 |
| 0.915790232 | CG  | Ler | CL | Region 2 | B-E06 | LerCol4F2 |
| 0.485165794 | CHG | Ler | CL | Region 2 | B-E06 | LerCol4F2 |
| 0.056759478 | CHH | Ler | CL | Region 2 | B-E06 | LerCol4F2 |
| 0.80509165  | CG  | Col | CC | Region 1 | B-F06 | LerCol4F2 |
| 0.454706071 | CHG | Col | CC | Region 1 | B-F06 | LerCol4F2 |
| 0.203946037 | CHH | Col | CC | Region 1 | B-F06 | LerCol4F2 |
| 0.916848371 | CG  | Col | CL | Region 2 | B-F06 | LerCol4F2 |

|             |     |     |    |          |       |           |
|-------------|-----|-----|----|----------|-------|-----------|
| 0.516771592 | CHG | Col | CL | Region 2 | B-F06 | LerCol4F2 |
| 0.060454302 | CHH | Col | CL | Region 2 | B-F06 | LerCol4F2 |
| 0.911845819 | CG  | Ler | CL | Region 2 | B-F06 | LerCol4F2 |
| 0.509088942 | CHG | Ler | CL | Region 2 | B-F06 | LerCol4F2 |
| 0.06043123  | CHH | Ler | CL | Region 2 | B-F06 | LerCol4F2 |
| 0.698200993 | CG  | Col | CL | Region 1 | B-G06 | LerCol4F2 |
| 0.258384333 | CHG | Col | CL | Region 1 | B-G06 | LerCol4F2 |
| 0.055038948 | CHH | Col | CL | Region 1 | B-G06 | LerCol4F2 |
| 0.459383754 | CG  | Ler | CL | Region 1 | B-G06 | LerCol4F2 |
| 0.259537784 | CHG | Ler | CL | Region 1 | B-G06 | LerCol4F2 |
| 0.052488871 | CHH | Ler | CL | Region 1 | B-G06 | LerCol4F2 |
| 0.913671266 | CG  | Col | CC | Region 2 | B-G06 | LerCol4F2 |
| 0.523061962 | CHG | Col | CC | Region 2 | B-G06 | LerCol4F2 |
| 0.06597079  | CHH | Col | CC | Region 2 | B-G06 | LerCol4F2 |
| 0.166507406 | CG  | Ler | LL | Region 1 | B-H06 | LerCol4F2 |
| 0.095414479 | CHG | Ler | LL | Region 1 | B-H06 | LerCol4F2 |
| 0.055122178 | CHH | Ler | LL | Region 1 | B-H06 | LerCol4F2 |
| 0.941871818 | CG  | Col | CL | Region 2 | B-H06 | LerCol4F2 |
| 0.535317067 | CHG | Col | CL | Region 2 | B-H06 | LerCol4F2 |
| 0.057573673 | CHH | Col | CL | Region 2 | B-H06 | LerCol4F2 |
| 0.938559242 | CG  | Ler | CL | Region 2 | B-H06 | LerCol4F2 |
| 0.515971133 | CHG | Ler | CL | Region 2 | B-H06 | LerCol4F2 |
| 0.053422313 | CHH | Ler | CL | Region 2 | B-H06 | LerCol4F2 |
| 0.671162171 | CG  | Col | CL | Region 1 | B-A07 | LerCol4F2 |
| 0.22987302  | CHG | Col | CL | Region 1 | B-A07 | LerCol4F2 |
| 0.109432333 | CHH | Col | CL | Region 1 | B-A07 | LerCol4F2 |
| 0.359267735 | CG  | Ler | CL | Region 1 | B-A07 | LerCol4F2 |
| 0.187020605 | CHG | Ler | CL | Region 1 | B-A07 | LerCol4F2 |
| 0.122646664 | CHH | Ler | CL | Region 1 | B-A07 | LerCol4F2 |
| 0.910379412 | CG  | Col | CC | Region 2 | B-A07 | LerCol4F2 |
| 0.440797629 | CHG | Col | CC | Region 2 | B-A07 | LerCol4F2 |
| 0.049994368 | CHH | Col | CC | Region 2 | B-A07 | LerCol4F2 |
| 0.676624225 | CG  | Col | CL | Region 1 | B-B07 | LerCol4F2 |
| 0.295915085 | CHG | Col | CL | Region 1 | B-B07 | LerCol4F2 |
| 0.143014862 | CHH | Col | CL | Region 1 | B-B07 | LerCol4F2 |
| 0.623866015 | CG  | Ler | CL | Region 1 | B-B07 | LerCol4F2 |

|             |     |     |    |          |       |           |
|-------------|-----|-----|----|----------|-------|-----------|
| 0.354708684 | CHG | Ler | CL | Region 1 | B-B07 | LerCol4F2 |
| 0.16879058  | CHH | Ler | CL | Region 1 | B-B07 | LerCol4F2 |
| 0.931985172 | CG  | Col | CL | Region 2 | B-B07 | LerCol4F2 |
| 0.466957916 | CHG | Col | CL | Region 2 | B-B07 | LerCol4F2 |
| 0.063765549 | CHH | Col | CL | Region 2 | B-B07 | LerCol4F2 |
| 0.927541456 | CG  | Ler | CL | Region 2 | B-B07 | LerCol4F2 |
| 0.447148106 | CHG | Ler | CL | Region 2 | B-B07 | LerCol4F2 |
| 0.059392598 | CHH | Ler | CL | Region 2 | B-B07 | LerCol4F2 |
| 0.652958456 | CG  | Col | CL | Region 1 | B-C07 | LerCol4F2 |
| 0.190472259 | CHG | Col | CL | Region 1 | B-C07 | LerCol4F2 |
| 0.057214518 | CHH | Col | CL | Region 1 | B-C07 | LerCol4F2 |
| 0.21277205  | CG  | Ler | CL | Region 1 | B-C07 | LerCol4F2 |
| 0.093495014 | CHG | Ler | CL | Region 1 | B-C07 | LerCol4F2 |
| 0.044458328 | CHH | Ler | CL | Region 1 | B-C07 | LerCol4F2 |
| 0.861897024 | CG  | Ler | LL | Region 2 | B-C07 | LerCol4F2 |
| 0.367560514 | CHG | Ler | LL | Region 2 | B-C07 | LerCol4F2 |
| 0.039534388 | CHH | Ler | LL | Region 2 | B-C07 | LerCol4F2 |
| 0.012060908 | CG  | Ler | LL | Region 1 | B-D07 | LerCol4F2 |
| 0.007600499 | CHG | Ler | LL | Region 1 | B-D07 | LerCol4F2 |
| 0.00703893  | CHH | Ler | LL | Region 1 | B-D07 | LerCol4F2 |
| 0.849671298 | CG  | Ler | LL | Region 2 | B-D07 | LerCol4F2 |
| 0.40045457  | CHG | Ler | LL | Region 2 | B-D07 | LerCol4F2 |
| 0.045230117 | CHH | Ler | LL | Region 2 | B-D07 | LerCol4F2 |
| 0.138209983 | CG  | Ler | LL | Region 1 | B-E07 | LerCol4F2 |
| 0.045439109 | CHG | Ler | LL | Region 1 | B-E07 | LerCol4F2 |
| 0.010845726 | CHH | Ler | LL | Region 1 | B-E07 | LerCol4F2 |
| 0.851843489 | CG  | Col | CL | Region 2 | B-E07 | LerCol4F2 |
| 0.481565575 | CHG | Col | CL | Region 2 | B-E07 | LerCol4F2 |
| 0.048185324 | CHH | Col | CL | Region 2 | B-E07 | LerCol4F2 |
| 0.920586141 | CG  | Ler | CL | Region 2 | B-E07 | LerCol4F2 |
| 0.494615577 | CHG | Ler | CL | Region 2 | B-E07 | LerCol4F2 |
| 0.051181327 | CHH | Ler | CL | Region 2 | B-E07 | LerCol4F2 |
| 0.486081782 | CG  | Col | CL | Region 1 | B-F07 | LerCol4F2 |
| 0.094348188 | CHG | Col | CL | Region 1 | B-F07 | LerCol4F2 |
| 0.017741021 | CHH | Col | CL | Region 1 | B-F07 | LerCol4F2 |
| 0.035674779 | CG  | Ler | CL | Region 1 | B-F07 | LerCol4F2 |

|             |     |     |    |          |       |           |
|-------------|-----|-----|----|----------|-------|-----------|
| 0.014557306 | CHG | Ler | CL | Region 1 | B-F07 | LerCol4F2 |
| 0.007986378 | CHH | Ler | CL | Region 1 | B-F07 | LerCol4F2 |
| 0.926577614 | CG  | Col | CL | Region 2 | B-F07 | LerCol4F2 |
| 0.476749551 | CHG | Col | CL | Region 2 | B-F07 | LerCol4F2 |
| 0.054652495 | CHH | Col | CL | Region 2 | B-F07 | LerCol4F2 |
| 0.924253966 | CG  | Ler | CL | Region 2 | B-F07 | LerCol4F2 |
| 0.456284908 | CHG | Ler | CL | Region 2 | B-F07 | LerCol4F2 |
| 0.052104712 | CHH | Ler | CL | Region 2 | B-F07 | LerCol4F2 |
| 0.788644054 | CG  | Col | CC | Region 1 | B-G07 | LerCol4F2 |
| 0.377540386 | CHG | Col | CC | Region 1 | B-G07 | LerCol4F2 |
| 0.201223517 | CHH | Col | CC | Region 1 | B-G07 | LerCol4F2 |
| 0.916321204 | CG  | Ler | LL | Region 2 | B-G07 | LerCol4F2 |
| 0.418059023 | CHG | Ler | LL | Region 2 | B-G07 | LerCol4F2 |
| 0.04939215  | CHH | Ler | LL | Region 2 | B-G07 | LerCol4F2 |
| 0.528825055 | CG  | Col | CL | Region 1 | B-H07 | LerCol4F2 |
| 0.152695789 | CHG | Col | CL | Region 1 | B-H07 | LerCol4F2 |
| 0.059081228 | CHH | Col | CL | Region 1 | B-H07 | LerCol4F2 |
| 0.070851165 | CG  | Ler | CL | Region 1 | B-H07 | LerCol4F2 |
| 0.036978094 | CHG | Ler | CL | Region 1 | B-H07 | LerCol4F2 |
| 0.034546959 | CHH | Ler | CL | Region 1 | B-H07 | LerCol4F2 |
| 0.85495306  | CG  | Ler | LL | Region 2 | B-H07 | LerCol4F2 |
| 0.410728536 | CHG | Ler | LL | Region 2 | B-H07 | LerCol4F2 |
| 0.049355243 | CHH | Ler | LL | Region 2 | B-H07 | LerCol4F2 |
| 0.759294995 | CG  | Col | CC | Region 1 | B-A08 | LerCol4F2 |
| 0.30427498  | CHG | Col | CC | Region 1 | B-A08 | LerCol4F2 |
| 0.088768156 | CHH | Col | CC | Region 1 | B-A08 | LerCol4F2 |
| 0.924934918 | CG  | Col | CC | Region 2 | B-A08 | LerCol4F2 |
| 0.454998678 | CHG | Col | CC | Region 2 | B-A08 | LerCol4F2 |
| 0.046877362 | CHH | Col | CC | Region 2 | B-A08 | LerCol4F2 |
| 0.052015088 | CG  | Ler | LL | Region 1 | B-B08 | LerCol4F2 |
| 0.011328125 | CHG | Ler | LL | Region 1 | B-B08 | LerCol4F2 |
| 0.008355488 | CHH | Ler | LL | Region 1 | B-B08 | LerCol4F2 |
| 0.936983842 | CG  | Col | CC | Region 2 | B-B08 | LerCol4F2 |
| 0.539608414 | CHG | Col | CC | Region 2 | B-B08 | LerCol4F2 |
| 0.053322945 | CHH | Col | CC | Region 2 | B-B08 | LerCol4F2 |
| 0.719740049 | CG  | Col | CL | Region 1 | B-C08 | LerCol4F2 |

|             |     |     |    |          |       |           |
|-------------|-----|-----|----|----------|-------|-----------|
| 0.347257926 | CHG | Col | CL | Region 1 | B-C08 | LerCol4F2 |
| 0.136816679 | CHH | Col | CL | Region 1 | B-C08 | LerCol4F2 |
| 0.245481433 | CG  | Ler | CL | Region 1 | B-C08 | LerCol4F2 |
| 0.176159794 | CHG | Ler | CL | Region 1 | B-C08 | LerCol4F2 |
| 0.128537769 | CHH | Ler | CL | Region 1 | B-C08 | LerCol4F2 |
| 0.910597341 | CG  | Ler | LL | Region 2 | B-C08 | LerCol4F2 |
| 0.53498506  | CHG | Ler | LL | Region 2 | B-C08 | LerCol4F2 |
| 0.06840445  | CHH | Ler | LL | Region 2 | B-C08 | LerCol4F2 |
| 0.743702081 | CG  | Col | CL | Region 1 | B-D08 | LerCol4F2 |
| 0.329011812 | CHG | Col | CL | Region 1 | B-D08 | LerCol4F2 |
| 0.169009635 | CHH | Col | CL | Region 1 | B-D08 | LerCol4F2 |
| 0.255010661 | CG  | Ler | CL | Region 1 | B-D08 | LerCol4F2 |
| 0.152596315 | CHG | Ler | CL | Region 1 | B-D08 | LerCol4F2 |
| 0.143230605 | CHH | Ler | CL | Region 1 | B-D08 | LerCol4F2 |
| 0.93491767  | CG  | Col | CL | Region 2 | B-D08 | LerCol4F2 |
| 0.514256693 | CHG | Col | CL | Region 2 | B-D08 | LerCol4F2 |
| 0.068798143 | CHH | Col | CL | Region 2 | B-D08 | LerCol4F2 |
| 0.928567866 | CG  | Ler | CL | Region 2 | B-D08 | LerCol4F2 |
| 0.488030695 | CHG | Ler | CL | Region 2 | B-D08 | LerCol4F2 |
| 0.063251414 | CHH | Ler | CL | Region 2 | B-D08 | LerCol4F2 |

---

**Supplementary Table S6 BLASTN search of region 1 & 2 in nuclear genome**

| Query                      | Subject     | %homology | Length | query start | query end | subject start | subject end | evalue   | score |
|----------------------------|-------------|-----------|--------|-------------|-----------|---------------|-------------|----------|-------|
| Region 1                   | NC_003074.8 | 100       | 194    | 1           | 194       | 16574327      | 16574520    | 3.94E-96 | 351   |
| (Chr3: 16574327..16574520) | NC_003074.8 | 85.714    | 28     | 88          | 115       | 10957907      | 10957880    | 1.4      | 33.7  |
|                            | NC_003074.8 | 95        | 20     | 148         | 167       | 1310505       | 1310524     | 4.8      | 31.9  |
|                            | NC_003074.8 | 88        | 25     | 92          | 116       | 8498072       | 8498096     | 4.8      | 31.9  |
|                            | NC_003074.8 | 82.857    | 35     | 95          | 127       | 11797694      | 11797726    | 4.8      | 31.9  |
|                            | NC_003074.8 | 95        | 20     | 173         | 192       | 19588363      | 19588382    | 4.8      | 31.9  |
|                            | NC_003076.8 | 83.784    | 37     | 131         | 167       | 4530896       | 4530931     | 0.11     | 37.4  |
|                            | NC_003076.8 | 100       | 18     | 91          | 108       | 5269926       | 5269909     | 1.4      | 33.7  |
|                            | NC_003076.8 | 91.304    | 23     | 8           | 30        | 8442048       | 8442070     | 1.4      | 33.7  |
|                            | NC_003076.8 | 86.667    | 30     | 122         | 150       | 14250474      | 14250503    | 1.4      | 33.7  |
|                            | NC_003076.8 | 91.304    | 23     | 92          | 114       | 16930225      | 16930247    | 1.4      | 33.7  |
|                            | NC_003076.8 | 91.304    | 23     | 130         | 152       | 17847755      | 17847777    | 1.4      | 33.7  |
|                            | NC_003076.8 | 88.462    | 26     | 8           | 33        | 25050969      | 25050944    | 1.4      | 33.7  |
|                            | NC_003076.8 | 88.889    | 27     | 159         | 184       | 875451        | 875425      | 4.8      | 31.9  |
|                            | NC_003076.8 | 100       | 17     | 172         | 188       | 6321088       | 6321072     | 4.8      | 31.9  |
|                            | NC_003076.8 | 95        | 20     | 86          | 105       | 9788535       | 9788516     | 4.8      | 31.9  |
|                            | NC_003076.8 | 85.185    | 27     | 145         | 171       | 12630759      | 12630733    | 4.8      | 31.9  |
|                            | NC_003076.8 | 88        | 25     | 91          | 115       | 21412086      | 21412062    | 4.8      | 31.9  |
|                            | NC_003076.8 | 88        | 25     | 82          | 106       | 24816273      | 24816297    | 4.8      | 31.9  |
|                            | NC_003070.9 | 89.286    | 28     | 68          | 95        | 21197751      | 21197724    | 0.11     | 37.4  |
|                            | NC_003070.9 | 91.667    | 24     | 21          | 44        | 539007        | 539030      | 0.4      | 35.6  |

|             |        |    |     |     |          |          |     |      |
|-------------|--------|----|-----|-----|----------|----------|-----|------|
| NC_003070.9 | 91.667 | 24 | 69  | 92  | 784731   | 784708   | 0.4 | 35.6 |
| NC_003070.9 | 89.286 | 28 | 91  | 116 | 18238124 | 18238151 | 0.4 | 35.6 |
| NC_003070.9 | 79.545 | 44 | 146 | 188 | 23294086 | 23294129 | 0.4 | 35.6 |
| NC_003070.9 | 90.909 | 22 | 85  | 106 | 2316432  | 2316411  | 4.8 | 31.9 |
| NC_003070.9 | 95     | 20 | 84  | 103 | 2993857  | 2993838  | 4.8 | 31.9 |
| NC_003070.9 | 95     | 20 | 14  | 33  | 7277405  | 7277386  | 4.8 | 31.9 |
| NC_003070.9 | 88     | 25 | 143 | 167 | 7682737  | 7682761  | 4.8 | 31.9 |
| NC_003070.9 | 80.556 | 36 | 150 | 185 | 11411221 | 11411253 | 4.8 | 31.9 |
| NC_003070.9 | 80     | 35 | 137 | 171 | 14457508 | 14457542 | 4.8 | 31.9 |
| NC_003070.9 | 100    | 17 | 177 | 193 | 19683805 | 19683789 | 4.8 | 31.9 |
| NC_003070.9 | 95     | 20 | 15  | 34  | 19965363 | 19965382 | 4.8 | 31.9 |
| NC_003070.9 | 100    | 17 | 25  | 41  | 26468731 | 26468715 | 4.8 | 31.9 |
| NC_003071.7 | 91.667 | 24 | 85  | 108 | 8267106  | 8267129  | 0.4 | 35.6 |
| NC_003071.7 | 81.081 | 37 | 131 | 167 | 18286713 | 18286679 | 1.4 | 33.7 |
| NC_003071.7 | 90.909 | 22 | 86  | 107 | 899921   | 899942   | 4.8 | 31.9 |
| NC_003071.7 | 78.571 | 42 | 91  | 132 | 8458064  | 8458104  | 4.8 | 31.9 |
| NC_003071.7 | 100    | 17 | 178 | 194 | 19052605 | 19052589 | 4.8 | 31.9 |
| NC_003075.7 | 95.238 | 21 | 146 | 166 | 7797147  | 7797167  | 1.4 | 33.7 |
| NC_003075.7 | 88     | 25 | 160 | 184 | 3632363  | 3632339  | 4.8 | 31.9 |
| NC_003075.7 | 95     | 20 | 75  | 94  | 8123542  | 8123523  | 4.8 | 31.9 |
| NC_003075.7 | 100    | 17 | 135 | 151 | 10167761 | 10167745 | 4.8 | 31.9 |
| NC_003075.7 | 85.714 | 28 | 161 | 188 | 10489418 | 10489442 | 4.8 | 31.9 |



|                          |             |        |     |     |     |          |          |           |      |
|--------------------------|-------------|--------|-----|-----|-----|----------|----------|-----------|------|
| Region 2                 | NC_003075.7 | 100    | 260 | 1   | 260 | 6341136  | 6341395  | 8.15E-132 | 470  |
| (Chr4: 6341136..6341395) | NC_003075.7 | 81.818 | 33  | 69  | 101 | 12071441 | 12071473 | 1.9       | 33.7 |
|                          | NC_003075.7 | 85.714 | 28  | 68  | 95  | 15808007 | 15808034 | 1.9       | 33.7 |
|                          | NC_003075.7 | 95     | 20  | 125 | 144 | 62004    | 62023    | 6.7       | 31.9 |
|                          | NC_003075.7 | 84.375 | 32  | 63  | 93  | 4167889  | 4167920  | 6.7       | 31.9 |
|                          | NC_003075.7 | 95     | 20  | 73  | 92  | 5598753  | 5598734  | 6.7       | 31.9 |
|                          | NC_003075.7 | 90.909 | 22  | 79  | 100 | 6640708  | 6640687  | 6.7       | 31.9 |
|                          | NC_003075.7 | 85.714 | 28  | 59  | 86  | 7855492  | 7855516  | 6.7       | 31.9 |
|                          | NC_003075.7 | 90.909 | 22  | 83  | 104 | 13691361 | 13691340 | 6.7       | 31.9 |
|                          | NC_003071.7 | 90.26  | 154 | 1   | 153 | 3294203  | 3294050  | 1.48E-52  | 206  |
|                          | NC_003071.7 | 95.833 | 48  | 151 | 198 | 3416715  | 3416762  | 5.17E-14  | 78.8 |
|                          | NC_003071.7 | 96.296 | 27  | 234 | 260 | 3259261  | 3259287  | 0.001     | 44.6 |
|                          | NC_003071.7 | 87.097 | 31  | 66  | 96  | 13656321 | 13656351 | 0.045     | 39.2 |
|                          | NC_003071.7 | 91.667 | 24  | 77  | 100 | 11628536 | 11628559 | 0.55      | 35.6 |
|                          | NC_003071.7 | 85.714 | 28  | 70  | 97  | 8345227  | 8345200  | 1.9       | 33.7 |
|                          | NC_003071.7 | 83.333 | 36  | 58  | 91  | 11647753 | 11647786 | 1.9       | 33.7 |
|                          | NC_003071.7 | 100    | 17  | 70  | 86  | 1589727  | 1589743  | 6.7       | 31.9 |
|                          | NC_003071.7 | 81.25  | 32  | 53  | 84  | 4415403  | 4415372  | 6.7       | 31.9 |
|                          | NC_003071.7 | 90.909 | 22  | 80  | 101 | 4476727  | 4476748  | 6.7       | 31.9 |
|                          | NC_003071.7 | 90.909 | 22  | 131 | 152 | 8820713  | 8820692  | 6.7       | 31.9 |
|                          | NC_003071.7 | 90.909 | 22  | 70  | 91  | 17907668 | 17907689 | 6.7       | 31.9 |
|                          | NC_003074.8 | 87.5   | 32  | 70  | 100 | 16292665 | 16292696 | 0.16      | 37.4 |
|                          | NC_003074.8 | 91.667 | 24  | 77  | 100 | 5417544  | 5417521  | 0.55      | 35.6 |

|             |        |    |     |     |          |          |      |      |
|-------------|--------|----|-----|-----|----------|----------|------|------|
| NC_003074.8 | 79.487 | 39 | 124 | 162 | 10583081 | 10583119 | 0.55 | 35.6 |
| NC_003074.8 | 89.286 | 28 | 124 | 151 | 11120973 | 11120948 | 0.55 | 35.6 |
| NC_003074.8 | 85.714 | 28 | 192 | 219 | 18117042 | 18117015 | 1.9  | 33.7 |
| NC_003074.8 | 88.462 | 26 | 131 | 156 | 18831080 | 18831105 | 1.9  | 33.7 |
| NC_003074.8 | 90.909 | 22 | 18  | 39  | 3060486  | 3060465  | 6.7  | 31.9 |
| NC_003074.8 | 86.207 | 29 | 67  | 94  | 4681053  | 4681081  | 6.7  | 31.9 |
| NC_003074.8 | 90.909 | 22 | 78  | 99  | 8545415  | 8545436  | 6.7  | 31.9 |
| NC_003074.8 | 88     | 25 | 67  | 91  | 9058074  | 9058050  | 6.7  | 31.9 |
| NC_003074.8 | 95.455 | 22 | 67  | 88  | 16208070 | 16208050 | 6.7  | 31.9 |
| NC_003074.8 | 100    | 17 | 56  | 72  | 18821135 | 18821151 | 6.7  | 31.9 |
| NC_003074.8 | 95     | 20 | 205 | 224 | 19085785 | 19085804 | 6.7  | 31.9 |
| NC_003076.8 | 100    | 19 | 86  | 104 | 7958151  | 7958133  | 0.55 | 35.6 |
| NC_003076.8 | 95.455 | 22 | 73  | 94  | 16409766 | 16409745 | 0.55 | 35.6 |
| NC_003076.8 | 95.455 | 22 | 122 | 143 | 18146787 | 18146766 | 0.55 | 35.6 |
| NC_003076.8 | 86.207 | 29 | 161 | 189 | 21758572 | 21758544 | 0.55 | 35.6 |
| NC_003076.8 | 100    | 18 | 85  | 102 | 18337399 | 18337382 | 1.9  | 33.7 |
| NC_003076.8 | 88.462 | 26 | 131 | 156 | 21814724 | 21814749 | 1.9  | 33.7 |
| NC_003076.8 | 81.25  | 32 | 6   | 37  | 2341249  | 2341280  | 6.7  | 31.9 |
| NC_003076.8 | 90.909 | 22 | 80  | 101 | 12569493 | 12569514 | 6.7  | 31.9 |
| NC_003076.8 | 88.462 | 26 | 75  | 100 | 14903690 | 14903667 | 6.7  | 31.9 |
| NC_003076.8 | 90.909 | 22 | 62  | 83  | 18172201 | 18172180 | 6.7  | 31.9 |
| NC_003076.8 | 95     | 20 | 81  | 100 | 20821360 | 20821341 | 6.7  | 31.9 |
| NC_003076.8 | 81.579 | 38 | 67  | 101 | 22537802 | 22537765 | 6.7  | 31.9 |

|             |        |    |     |     |          |          |     |      |
|-------------|--------|----|-----|-----|----------|----------|-----|------|
| NC_003070.9 | 91.304 | 23 | 79  | 101 | 11063045 | 11063023 | 1.9 | 33.7 |
| NC_003070.9 | 91.304 | 23 | 79  | 101 | 24013078 | 24013056 | 1.9 | 33.7 |
| NC_003070.9 | 95.652 | 23 | 175 | 197 | 24439859 | 24439880 | 1.9 | 33.7 |
| NC_003070.9 | 88.462 | 26 | 131 | 156 | 24918439 | 24918414 | 1.9 | 33.7 |
| NC_003070.9 | 88.462 | 26 | 115 | 140 | 28953545 | 28953570 | 1.9 | 33.7 |
| NC_003070.9 | 90.909 | 22 | 79  | 100 | 3318818  | 3318839  | 6.7 | 31.9 |
| NC_003070.9 | 83.333 | 30 | 116 | 145 | 17443217 | 17443246 | 6.7 | 31.9 |
| NC_003070.9 | 90.909 | 22 | 74  | 95  | 17648101 | 17648080 | 6.7 | 31.9 |
| NC_003070.9 | 86.207 | 29 | 68  | 95  | 20446559 | 20446531 | 6.7 | 31.9 |
| NC_003070.9 | 95     | 20 | 84  | 103 | 22324791 | 22324772 | 6.7 | 31.9 |
| NC_003070.9 | 90.909 | 22 | 67  | 88  | 22501897 | 22501876 | 6.7 | 31.9 |
| NC_003070.9 | 100    | 17 | 66  | 82  | 23714121 | 23714105 | 6.7 | 31.9 |
| NC_003070.9 | 100    | 17 | 71  | 87  | 25261407 | 25261423 | 6.7 | 31.9 |
| NC_003070.9 | 88.889 | 27 | 66  | 92  | 28123874 | 28123899 | 6.7 | 31.9 |

---
