# Supplementary material for: DNA Methylation Diversification at the Integrated Organellar DNA-Like Sequence
Source: MDPI journal article supplement (doi:10.3390/genes9120602), 2018-12-03
Supplement: s1 [file s1]

# Supplemental File 2

# Commands of data analysis

# Trimming of Fastq file

```
java -jar trimmomatic-0.35.jar PE -threads 24 -trimlog file.log R1.fastq.gz R2.fastq.gz  
R1_paired.fastq.gz R1_unpaired.fastq.gz R2_paired.fastq.gz R2_unpaired.fastq.gz  
ILLUMINACLIP:adaptor.fasta:2:30:10 HEADCROP:25 TRAILING:3 SLIDINGWINDOW:4:15  
MINLEN:123
```

# Reference sequence preparation

```
bismark_genome_preparation --bowtie2 --verbose /path/to/bismark_ref_b2/
```

# Mapping of reads

```
bismark --bowtie2 -N 1 -L 20 -e 90 -p 4 -o /path/to/result/dir /path/to/bismark_ref_b2/ -1  
/path/to/R1_paired.fastq.gz -2 /path/to/R2_paired.fastq.gz
```

# Methylation data extraction

```
samtools view -h results_bsmrk_bt2_pe.bam > results_bsmrk_bt2_pe.sam
```

```
bismark_methylation_extractor -p --no_overlap --cytosine_report --CX -o out_dir --  
genome_folder /path/to/bismark_ref_b2 results_bsmrk_bt2_pe.sam
```
